# Supplementary material for: Medium-sized cyclic bis(anisylphosphonothioyl)disulfanes and their corresponding cyclic sulfane-structures and most characteristic reactions
Source: Royal Society of Chemistry journal article supplement (doi:10.1039/c9nj03682b), 2019-01-01
Supplement: c9nj03682b1.pdf [file c9nj03682b1.pdf]

## Medium sized cyclic bis(anisylphosphonothioyl) disulfanes and the corresponding related cyclic sulfanes - structure and the most characteristic reactions

Witold Przychodzeń\*, Jarosław Chojnacki, Łukasz Nierzwicki

Faculty of Chemistry, Gdańsk University of Technology, Narutowicza 11, 80233 Gdansk (Poland) E-mail:  
[witold.przychodzen@pg.edu.pl](mailto:witold.przychodzen@pg.edu.pl)

### Electronic Supplementary Information

| CONTENT                                                                                                                                                   | Page   |
|-----------------------------------------------------------------------------------------------------------------------------------------------------------|--------|
| Materials                                                                                                                                                 | S4     |
| Instrumentation                                                                                                                                           | S4     |
| Characterization data for compounds <b>2b</b> , <b>2b'</b> , <b>2d</b> , <b>3a-3c</b> and <b>4a</b>                                                       | S5     |
| NMR Spectra and NMR spectral parameters of compounds <b>2 - 4</b>                                                                                         | S8-S24 |
| Figure S1. <sup>1</sup> H NMR spectrum of <b>2b'</b> in CDCl <sub>3</sub>                                                                                 | S8     |
| Figure S2. <sup>13</sup> C NMR spectrum of <b>2b'</b> in CDCl <sub>3</sub>                                                                                | S8     |
| Figure S3. <sup>31</sup> P { <sup>1</sup> H} NMR spectrum of <b>2b'</b> in CDCl <sub>3</sub>                                                              | S9     |
| Figure S4. <sup>1</sup> H NMR spectrum of <b>2d</b> in CDCl <sub>3</sub>                                                                                  | S9     |
| Figure S5. <sup>13</sup> C NMR spectrum of <b>2d</b> in CDCl <sub>3</sub>                                                                                 | S10    |
| Figure S6. <sup>31</sup> P NMR spectrum of <b>2d</b> in CDCl <sub>3</sub>                                                                                 | S10    |
| Figure S7. <sup>1</sup> H NMR spectrum of <i>cis</i> - <b>3a</b> in CDCl <sub>3</sub>                                                                     | S11    |
| Figure S8. <sup>13</sup> C NMR spectrum of <i>cis</i> - <b>3a</b> in CDCl <sub>3</sub>                                                                    | S11    |
| Figure S9. <sup>1</sup> H NMR spectrum of <i>trans</i> - <b>3a</b> in CDCl <sub>3</sub>                                                                   | S12    |
| Figure S10. <sup>13</sup> C NMR spectrum of <i>trans</i> - <b>3a</b> in CDCl <sub>3</sub>                                                                 | S12    |
| Figure S11. <sup>1</sup> H NMR spectrum of <i>cis</i> - <b>3b</b> in CDCl <sub>3</sub>                                                                    | S13    |
| Figure S12. <sup>13</sup> C NMR spectrum of <i>cis</i> - <b>3b</b> in CDCl <sub>3</sub>                                                                   | S13    |
| Figure S13. <sup>1</sup> H NMR spectrum of <i>trans</i> - <b>3b</b> in CDCl <sub>3</sub>                                                                  | S14    |
| Figure S14. <sup>13</sup> C NMR spectrum of <i>trans</i> - <b>3b</b> in CDCl <sub>3</sub>                                                                 | S14    |
| Figure S15. <sup>1</sup> H NMR spectrum of a crude mixture of <i>cis</i> - <b>3b</b> and <i>trans</i> - <b>3b</b> (4:1) in C <sub>6</sub> D <sub>6</sub>  | S15    |
| Figure S16. <sup>31</sup> P NMR spectrum of a crude mixture of <i>cis</i> - <b>3b</b> and <i>trans</i> - <b>3b</b> (4:1) in C <sub>6</sub> D <sub>6</sub> | S15    |
| Figure S17. <sup>1</sup> H NMR spectrum of <i>cis</i> - <b>3c</b> in CDCl <sub>3</sub>                                                                    | S16    |
| Figure S18. <sup>13</sup> C NMR spectrum of <i>cis</i> - <b>3c</b> in CDCl <sub>3</sub>                                                                   | S16    |
| Figure S19. <sup>1</sup> H NMR spectrum of <i>trans</i> - <b>3c</b> in CDCl <sub>3</sub>                                                                  | S17    |
| Figure S20. <sup>13</sup> C NMR spectrum of <i>trans</i> - <b>3c</b> in CDCl <sub>3</sub>                                                                 | S17    |
| Figure S21. <sup>1</sup> H NMR spectrum of <b>4a</b> in CDCl <sub>3</sub>                                                                                 | S18    |

|                                                                                                                                                                                                                                                                                                                                                                          |                |
|--------------------------------------------------------------------------------------------------------------------------------------------------------------------------------------------------------------------------------------------------------------------------------------------------------------------------------------------------------------------------|----------------|
| <b>Figure S22.</b> $^{13}\text{C}$ NMR spectrum of <b>4a</b> in $\text{CDCl}_3$                                                                                                                                                                                                                                                                                          | <b>S18</b>     |
| <b>Figure S23.</b> $^1\text{H}$ and $^{31}\text{P}$ NMR spectra of <b>2b</b> in $\text{CDCl}_3$ recorded at room and low temperatures                                                                                                                                                                                                                                    | <b>S19</b>     |
| <b>Figure S24.</b> $^1\text{H}$ NMR spectra of <b>2b</b> in $\text{C}_2\text{Cl}_4$ recorded at a) $50^\circ\text{C}$ and b) $100^\circ\text{C}$                                                                                                                                                                                                                         | <b>S20</b>     |
| <b>Figure S25.</b> $^1\text{H}$ NMR spectra of <b>2b</b> in $\text{C}_5\text{D}_6\text{NO}_2$ recorded at a) $70^\circ\text{C}$ , b) $110^\circ\text{C}$ , c) $150^\circ\text{C}$ , d) $185^\circ\text{C}$ and e) $185^\circ\text{C}$ for 15 min.                                                                                                                        | <b>S20</b>     |
| <b>Figure S26.</b> $^{31}\text{P}$ NMR spectra of <b>2a</b> + $\text{Ph}_3\text{P}$ (a) and <b>2a</b> + $\text{Ph}_3\text{P}$ plus 2,4- $(\text{NO}_2)_2\text{C}_6\text{H}_3\text{COOH}$ (b) in $\text{MeCN-CH}_2\text{Cl}_2$ (1:1) plus 10% $\text{C}_6\text{D}_6$                                                                                                      | <b>S21</b>     |
| <b>Figure S27.</b> $^{31}\text{P}$ NMR spectra of reaction products obtained using the general procedure (see experimental section), which was intended to give rise to 14- and 20-membered disulfanes                                                                                                                                                                   | <b>S21</b>     |
| <b>Figure S28.</b> 202 MHz $^{31}\text{P}$ NMR spectra of the solution of disulfane <b>2b</b> in $\text{DMSO-d}_6$ showing the presence of <b>2b</b> S-oxides as its initial oxidation products.                                                                                                                                                                         | <b>S22</b>     |
| <b>Figure S29.</b> Correlations of cyclic disulfanes <b>2</b> (except for <b>2b'</b> ) ring size and the difference in chemical shifts for geminal protons $\Delta\delta_{\text{Hax-Heq}}$ (blue line) and for aromatic $\Delta\delta_{\text{Hortho-Hmeta}}$ protons (red line) taken from NMR spectra recorded in $\text{CDCl}_3$ at room temperature.                  | <b>S22</b>     |
| <b>Figure S30.</b> 202 MHz $^{31}\text{P}$ NMR spectra of sulfane <b>3c</b> isomers containing $^{13}\text{C}$ satellites showing a difference in P-P couplings: a) <i>cis-3c</i> (dd, $^1J_{\text{PC}} = 135$ Hz, $^2J_{\text{PP}} = -19.3$ Hz) and b) <i>trans-3c</i> (dd, $^1J_{\text{PC}} = 135$ Hz, $^2J_{\text{PP}} = -12.8$ Hz).                                  | <b>S23</b>     |
| <b>Figure S31.</b> AA'X ( $\text{OCH}_2$ ), C2' and C3' false multiplets observed in $^{13}\text{C}$ NMR spectra of (a) disulfane <b>2c</b> ( $^3J_{\text{PP}} = 4$ Hz), (b) sulfane <i>cis-3c</i> ( $^2J_{\text{PP}} = -21$ Hz), and sulfane <i>trans-3c</i> ( $^2J_{\text{PP}} = -14$ Hz) caused by second-order effects of phosphorus atoms magnetic non-equivalence. | <b>S23</b>     |
| <b>Table S1.</b> Calculated and experimental $^{31}\text{P}$ NMR parameters for cyclic <b>2</b> and <b>3</b>                                                                                                                                                                                                                                                             | <b>S24</b>     |
| <b>IR and Raman spectra</b>                                                                                                                                                                                                                                                                                                                                              | <b>S25-S27</b> |
| <b>Figure S32.</b> IR spectrum of disulfane <b>2a</b>                                                                                                                                                                                                                                                                                                                    | <b>S25</b>     |
| <b>Figure S33.</b> Raman spectrum of disulfane <b>2a</b>                                                                                                                                                                                                                                                                                                                 | <b>S25</b>     |
| <b>Figure S34.</b> IR spectrum of disulfane <b>2b</b>                                                                                                                                                                                                                                                                                                                    | <b>S26</b>     |
| <b>Figure S35.</b> IR spectrum of disulfane <b>2c</b>                                                                                                                                                                                                                                                                                                                    | <b>S27</b>     |
| <b>Figure S36.</b> Raman spectrum of disulfane <b>2c</b>                                                                                                                                                                                                                                                                                                                 | <b>S27</b>     |
| <b>X-Ray structural analysis</b>                                                                                                                                                                                                                                                                                                                                         | <b>S28-S33</b> |
| <b>Figure S37.</b> View of structure <b>2a</b> showing atom labelling scheme.                                                                                                                                                                                                                                                                                            | <b>S28</b>     |
| <b>Figure S38.</b> View of structure <b>2b</b> showing atom labelling scheme.                                                                                                                                                                                                                                                                                            | <b>S28</b>     |
| <b>Figure S39.</b> View of structure <b>2b'</b> showing atom labelling scheme.                                                                                                                                                                                                                                                                                           | <b>S29</b>     |
| <b>Figure S40.</b> View of structure <b>2c</b> showing atom labelling scheme.                                                                                                                                                                                                                                                                                            | <b>S29</b>     |
| <b>Figure S41.</b> View of structure <b>2d_triclinic</b> showing atom labelling scheme.                                                                                                                                                                                                                                                                                  | <b>S30</b>     |
| <b>Figure S42.</b> View of structure <b>2d_monoclinic</b> showing atom labelling scheme.                                                                                                                                                                                                                                                                                 | <b>S30</b>     |
| <b>Figure S43.</b> View of structure <i>trans-3a</i> showing atom labelling scheme.                                                                                                                                                                                                                                                                                      | <b>S31</b>     |
| <b>Figure S44.</b> View of structure <i>cis-3a</i> showing atom labelling scheme.                                                                                                                                                                                                                                                                                        | <b>S31</b>     |
| <b>Figure S45.</b> View of structure <i>trans-3b</i> showing atom labelling scheme.                                                                                                                                                                                                                                                                                      | <b>S32</b>     |
| <b>Figure S46.</b> View of structure <i>cis-3b</i> showing atom labelling scheme.                                                                                                                                                                                                                                                                                        | <b>S32</b>     |
| <b>Figure S47.</b> View of structure <i>trans-3c</i> showing atom labelling scheme.                                                                                                                                                                                                                                                                                      | <b>S33</b>     |

|                                                                                                                                                                                                          |                          |
|----------------------------------------------------------------------------------------------------------------------------------------------------------------------------------------------------------|--------------------------|
| <b>Figure S48.</b> View of structure <i>cis-3c</i> showing atom labelling scheme.                                                                                                                        | <b>S33</b>               |
| <b>Table S2.</b> Details of the X-ray data collections and refinements for cyclic disulfanes <b>2a-d*</b>                                                                                                | <b>S34</b>               |
| <b>Table S3.</b> Details of the X-ray data collections and refinements for cyclic sulfanes <b>3</b>                                                                                                      | <b>S35</b>               |
| <b>Table S4.</b> Geometric parameters for cyclic disulfanes <b>2</b> and a reference, acyclic structure                                                                                                  | <b>S36</b>               |
| <b>Table S5.</b> Geometric parameters for cyclic sulfanes <b>3</b>                                                                                                                                       |                          |
| <b>Table S6.</b> Hydrogen-bond geometry (Å, °) for investigated cyclic disulfanes <b>2</b> .                                                                                                             | <b>S37</b>               |
| <b>Table S7.</b> Hydrogen-bond geometry (Å, °) for investigated sulfides <b>3</b>                                                                                                                        | <b>S39</b>               |
| <b>Table S8.</b> Transannular hydrogens and transannular H-H repulsive and H-S attractive interactions taken from X-Ray structures and from calculated structures (in brackets) of <b>2</b> and <b>3</b> | <b>S40</b><br><b>S43</b> |
| <b>Calculations</b>                                                                                                                                                                                      | <b>S45-S48</b>           |
| <b>Figure S49.</b> Dipole moment and its orientation for <i>cis-3a</i>                                                                                                                                   | <b>S46</b>               |
| <b>Figure S50.</b> Dipole moment and its orientation for <i>trans-3a</i>                                                                                                                                 | <b>S46</b>               |
| <b>Figure S51.</b> Dipole moment and its orientation for <i>cis-3b</i>                                                                                                                                   | <b>S47</b>               |
| <b>Figure S51.</b> Dipole moment and its orientation for <i>trans-3b</i>                                                                                                                                 | <b>S47</b>               |
| <b>Figure S53.</b> Dipole moment and its orientation for <i>cis-3c</i>                                                                                                                                   | <b>S48</b>               |
| <b>Figure S54.</b> Dipole moment and its orientation for <i>trans-3c</i>                                                                                                                                 | <b>S48</b>               |

## Materials

Merck silica gel (particle size 0.04–0.063 mm) was used for conventional silica gel chromatography, while thin-layer chromatography was performed using Merck silica-gel 60 F254 coated on aluminium sheets. THF was distilled from potassium-benzophenone ketyl. Lawesson's reagent (Sigma-Aldrich) was recrystallized from chlorobenzene prior to use. Ethylene glycol, neopentyl glycol, 1,4-butanediol, 1,6-hexanediol and 2-chloro-*N*-methylpyridinium iodide (Mukaiyama's reagent MR) were commercially available (Sigma-Aldrich) and were used as received. Ethyl 3-hydroxy-2-(hydroxymethyl)propanoate was prepared according to a reported procedure.<sup>1</sup> Cyclic disulfanes **2a**, **2b** and **2c** were obtained using the previously described procedure<sup>8,12</sup> and acyclic **2h** according to Grossmann's procedure<sup>22</sup>.

## Instrumentation

NMR spectra were recorded on a Varian Unity Inova 500 MHz and on a Bruker AVANCE 400 MHz spectrometers with TMS or H<sub>3</sub>PO<sub>4</sub> as external standards. <sup>1</sup>H and <sup>13</sup>C spectra were obtained in CDCl<sub>3</sub> and <sup>31</sup>P NMR spectra in CDCl<sub>3</sub> or MeCN/C<sub>6</sub>D<sub>6</sub> 10:1 (v/v) solutions. The assignment of the chemical shifts and coupling constants of the complex spin systems formed by the OCH<sub>2</sub> protons in cyclic disulfanes **2** and sulfanes **3** was made by <sup>1</sup>H, <sup>1</sup>H-COSY and decoupled <sup>31</sup>P and/or <sup>1</sup>H NMR experiments. The couplings <sup>n</sup>J<sub>PC</sub> observed as deceptive triplets or quintets, indicating the second-order effects, were described as multiplets (m) and their values were estimated by measuring the distances between the external transitions of the respective multiplets. IR spectra were recorded on a Thermo Scientific Nicolet 6700 spectrometer outfitted with a Smart Orbit diamond ATR cell or on a FTIR spectrometer (ATR method; NICOLET iS5; Thermo Fisher Scientific, Waltham, MA, USA) at wavenumbers of 400 to 4000 cm<sup>-1</sup>. Powder samples of pure analyte were pressed onto the cell window. Raman spectra of crystals were recorded with an Aramis Horiba Jobin-Yvon micro-Raman spectrometer, using a solid state 500 mW visible laser operating at 532 nm. MS/MS positive ion mode mass spectra (70-120 V) were obtained using a 4000 Q TRAP hybrid triple quadrupole linear ion trap mass spectrometer (Applied Biosystems/MDS Sciex).

X-ray analyses were carried out using KUMA KM4 CCD (6 cases) or Stoe IPDS instruments (4 cases, see Supp. Info.). KUMA: Diffraction data were recorded at 120.0 (2) K or at room temperature 293.0 (2) K on a KUMA KM4 (Wrocław, Poland) diffractometer with graphite-monochromated Mo K $\alpha$  radiation (0.71073 Å), equipped with a Sapphire 2 CCD camera (Oxford Diffraction, Yarnton, England). Data collection was performed using CrysAlisPro (Agilent Technologies, 2013) in the  $\omega$ -scan mode. Analytical absorption correction was applied for all strongly absorbing crystals.

Stoe: Diffraction intensity data were collected on an IPDS 2T dual-beam diffractometer (Stoe & Cie GmbH, Darmstadt, Germany) at 120.0 (2) K with Mo K $\alpha$  radiation of a microfocus X-ray source (GeniX 3D Mo High Flux, Xenocs, Sassenage, 50 kV, 1.0 mA,  $\lambda = 0.71069$  Å). The crystal was thermostated in a nitrogen stream at 120 K using a Cryo-Stream-800 device

---

<sup>1</sup> S. Yoshida, K. Obitsu, Y. Hayashi, M. Shibasaki, T. Kimura, T. Takahashi, T. Asano, H. Kubota, and T. Mukuta, *Org. Process Res. Dev.*, 2012, **16**, 1527–1537.

(Oxford CryoSystem, UK) during the entire experiment. Data collection and reduction were controlled by X-Area\_1.75 (Stoe, 2015). An absorption correction was performed on the integrated reflections by a combination of frame scaling, reflection scaling and a spherical absorption correction. Outliers have been rejected according to Blessing's method (Blessing, 1997).

## Characterization data for compounds 2b, 2b', 2d, 3a-3c and 4a

**8-Ethoxycarbonyl-2,5-bis(4-methoxyphenyl)-8-methyl-1,6,3,4,2,5-dioxadithiadiphosphonane 2,5-disulfide (2b').** Yield: 0.468 g (85%); mp 112 °C (from ethyl acetate-cyclohexane). NMR ( $\delta$  in ppm):  $^1\text{H}$  NMR ( $\text{CDCl}_3$ ) 1.32 (t, 3H,  $\text{CH}_3$ ), 3.29 (m, 1H, C2H), 3.87 and 3.88 (2 x s,  $\text{OCH}_3$ ), 4.29 (m, 2H,  $\text{OCH}_2\text{CH}_3$ ), 4.49 (ddd,  $^2J_{\text{HH}} = 10.2$  Hz,  $^3J_{\text{HH}} = 5.3$  Hz,  $^3J_{\text{HP}} = 1.5$  Hz, 1H, C1/3 $\text{H}_{\text{eq1}}$ ), 4.66 (ddd,  $^2J_{\text{HH}} = 10.2$  Hz,  $^3J_{\text{HH}} = 2.0$  Hz,  $^3J_{\text{HP}} = 1.5$  Hz, 1H, C1/3 $\text{H}_{\text{eq2}}$ ), 4.82 (ddd,  $^2J_{\text{HH}} = 10.2$  Hz,  $^3J_{\text{PH}} = 7.1$  Hz,  $^3J_{\text{HH}} = 3.0$  Hz, 1H, C1/3 $\text{H}_{\text{ax1}}$ ), 4.85 (ddd,  $^2J_{\text{HH}} = 10.2$  Hz,  $^3J_{\text{PH}} = 7.1$  Hz,  $^3J_{\text{HH}} = 1.0$  Hz, 1H, C1/3 $\text{H}_{\text{ax2}}$ ), 7.01 (dd,  $^3J_{\text{HH}} = 8.8$  Hz,  $^4J_{\text{HP}} = 3.9$  Hz, 2H, C3'/5'), 7.02 (dd,  $^3J_{\text{HH}} = 8.8$  Hz,  $^4J_{\text{HP}} = 3.9$  Hz, 2H, C3'/5'), 7.87 (dd,  $^3J_{\text{HP}} = 13.7$  Hz,  $^3J_{\text{HH}} = 8.8$  Hz, 2H, C2'/6'), 7.91 (dd,  $^3J_{\text{HP}} = 13.7$  Hz,  $^3J_{\text{HH}} = 8.8$  Hz, 2H, C2'/6');  $^{13}\text{C}$  NMR ( $\text{CDCl}_3$ ) 14.44 ( $\text{CH}_3$ ), 44.48 (t,  $^3J_{\text{CP}} = 10.1$  Hz, CH), 55.79 and 55.80 ( $\text{OCH}_3$ ), 60.62 (d,  $^2J_{\text{CP}} = 4.3$  Hz,  $\text{POCH}_2$ ), 62.03 ( $\text{COOCH}_2$ ), 114.43 (d,  $J = 16.7$  Hz, C3'/5'), 114.46 (d,  $J = 16.8$  Hz, C3'/5'), 124.03 (d,  $J_1 = 134$  Hz, C1'), 124.09 (d,  $J_1 = 134$  Hz, C1'), 133.40 (d,  $J = 13.4$  Hz, C2'/6'), 133.42 (d,  $J = 13.5$  Hz, C2'/6'), 163.72 (C4'), 163.75 (C4');  $^{31}\text{P}\{^1\text{H}\}$  NMR ( $\text{CDCl}_3$ ) 88.9 ( $^3J_{\text{PP}} = 4.2$  Hz), 89.9 ( $^3J_{\text{PP}} = 4.2$  Hz);  $^{31}\text{P}$  NMR (noded): 88.9 (tddtd,  $^3J_{\text{PHaryl}} = 14.1$  Hz,  $^3J_{\text{PHalkyl}} = 13.3$  Hz,  $^3J_{\text{PP}} = 4.2$  Hz,  $^4J_{\text{PHaryl}} = 3.9$  Hz,  $^3J_{\text{PHalkyl}} = 1.5$  Hz) 89.9 (tddtd,  $^3J_{\text{PHaryl}} = 14.1$  Hz,  $^3J_{\text{PHalkyl}} = 13.3$  Hz,  $^3J_{\text{PP}} = 4.2$  Hz,  $^4J_{\text{PHaryl}} = 3.9$  Hz,  $^3J_{\text{PHalkyl}} = 1.5$  Hz). MS calcd for  $[\text{C}_{20}\text{H}_{24}\text{O}_6\text{P}_2\text{S}_4]^+$  (M) $^+$ : 549.99; found: 551.1  $[\text{M}+\text{H}]^+$ .

**2,5-bis(4-methoxyphenyl)-1,6,3,4,2,5-dioxadithiadiphosphacyclododecane 2,5-disulfide (2d).** Yield: 0.094 g (18%); mp 157-159 °C (from chloroform-cyclohexane). NMR ( $\delta$  in ppm):  $^1\text{H}$  NMR ( $\text{CDCl}_3$ ) 1.67 (m, 4H), 1.82 (m, 2H), 2.09 (m, 2H), 3.84 (s, 6H,  $\text{OCH}_3$ ), 4.27 (dddd,  $^3J_{\text{HH}} = 11.6$  Hz,  $^2J_{\text{HH}} = 10.0$  Hz,  $^3J_{\text{HP}} = 5.4$  Hz,  $^3J_{\text{HH}} = 2.2$  Hz, 2H,  $\text{H}_A$ , 2H), 4.49 (ddt,  $^2J_{\text{HH}} = 10.0$  Hz,  $^3J_{\text{HP}} = 9.3$  Hz,  $^3J_{\text{HH}} = 3.5$  Hz, 2H,  $\text{H}_B$ ), 7.01 (dd,  $^3J_{\text{HH}} = 8.8$  Hz,  $^4J_{\text{HP}} = 3.9$  Hz, 4H), 7.83 (dd,  $^3J_{\text{HP}} = 13.7$  Hz,  $^3J_{\text{HH}} = 8.8$  Hz, 4H);  $^{13}\text{C}$  NMR ( $\text{CDCl}_3$ ): 21.42 (C3), 28.59 (d,  $J = 11.4$  Hz, C2), 55.76 (C-7'), 63.79 (m,  $J = 4.8$  Hz, C1), 114.47 (d,  $J = 17.6$  Hz, C-3'/5'), 124.52 (d,  $J = 134$  Hz, C-1'), 133.33 (d,  $J = 14.5$  Hz, C-2'/6'), 163.49 (C-4');  $^{31}\text{P}\{^1\text{H}\}$  NMR ( $\text{CDCl}_3$ ): 89.99 ( $^3J_{\text{PP}} = 4$  Hz). Calc. for  $\text{C}_{20}\text{H}_{26}\text{O}_4\text{P}_2\text{S}_4$ : 520.02. Found: 521.0  $[\text{M}+\text{H}]^+$ .

**cis-2,4-bis(4-methoxyphenyl)-1,5,3,2,4-dioxathiadiphosphepane 2,4-disulfide (cis-3a).** Yield: 0.039 g (9%); colourless needles; mp 133-134 °C (from ethyl acetate-hexane);  $R_f = 0.06$  (chloroform-hexane 1:1),  $R_f = 0.29$  (hexane-ethyl acetate 7:3). NMR ( $\delta$  in ppm):  $^1\text{H}$  NMR ( $\text{CDCl}_3$ ) 3.83 (s, 6H,  $\text{OCH}_3$ ), 4.48 (m, 2H), 5.17 (m, 2H), 6.79 (dd,  $^3J_{\text{HH}} = 8.8$  Hz,  $^4J_{\text{HP}} = 3.4$  Hz, 4H), 7.62 (dd,  $^3J_{\text{HP}} = 14.7$  Hz,  $^3J_{\text{HH}} = 8.8$  Hz, 4H);  $^{13}\text{C}$  NMR ( $\text{CDCl}_3$ ) 55.49 ( $\text{CH}_3\text{O}$ ), 65.18 (d,  $^2J_{\text{CP}} = 7$  Hz,  $\text{OCH}_2$ ), 113.84 (d,  $^3J_{\text{CP}} = 17.0$  Hz, C-3'/5'), 126.62 (d,  $^1J_{\text{CP}} = 135$  Hz, C-1'), 132.69 (m,  $^2J_{\text{CP}} = 14.5$  Hz, C2'/6'), 163.09 (d,  $^4J_{\text{CP}} = 3.4$  Hz, C-4');  $^{31}\text{P}\{^1\text{H}\}$  NMR ( $\text{MeCN-CH}_2\text{Cl}_2$  1:1, 10%  $\text{C}_6\text{D}_6$ ) 85.92. Calc. for  $\text{C}_{16}\text{H}_{18}\text{O}_4\text{P}_2\text{S}_3$ : 431.98. Found: 433.0  $[\text{M}+\text{H}]^+$ .

**trans-2,4-bis(4-methoxyphenyl)-[1,5,3,2,4-dioxathiadiphosphepane 2,4-disulfide (trans-3a).** Yield: 0.329 g (76%); colourless needles; mp 129-130 °C (from ethyl acetate-hexane);  $R_f = 0.15$  (chloroform-hexane 1:1),  $R_f = 0.53$  (hexane-ethyl acetate 7:3); NMR ( $\delta$  in ppm):  $^1\text{H}$  NMR ( $\text{CDCl}_3$ ) 3.86 (s, 6H,  $\text{OCH}_3$ ), 4.32 (m, 2H), 5.23 (m, 2H), 6.99 (dd,  $^3J_{\text{HH}} = 8.8$  Hz,  $^4J_{\text{HP}} = 3.4$  Hz, 4H), 8.13 (dd,  $^3J_{\text{HP}} = 14.7$  Hz,  $^3J_{\text{HH}} = 8.8$  Hz, 4H);  $^{13}\text{C}$  NMR ( $\text{CDCl}_3$ ) 55.77

(CH<sub>3</sub>O), 66.38 (m, <sup>2</sup>J<sub>CP</sub> = 7.0 Hz, OCH<sub>2</sub>), 114.12 (m, <sup>3</sup>J<sub>CP</sub> = 16.8 Hz, C-3'/5'), 125.85 (d, <sup>1</sup>J<sub>CP</sub> = 136.1 Hz, C-1'), 133.88 (m, <sup>2</sup>J<sub>CP</sub> = 14.2 Hz, C2'/6'), 163.69 (s, C-4'); <sup>31</sup>P{<sup>1</sup>H} NMR (MeCN-CH<sub>2</sub>Cl<sub>2</sub> 1:1, 10% C<sub>6</sub>D<sub>6</sub>): 89.04 (<sup>2</sup>J<sub>PP</sub> = -13 Hz). Calc. for C<sub>16</sub>H<sub>18</sub>O<sub>4</sub>P<sub>2</sub>S<sub>3</sub>: 431.98. Found: 433.0 [M+H]<sup>+</sup>.

**cis-2,4-bis(4-methoxyphenyl)-7,7-dimethyl-1,5,3,2,4-dioxathiadiphosphocane 2,4-disulfide (cis-3b).** Yield: 0.186 g (43%); colourless prisms; mp 196-198 °C (from ethyl acetate-cyclohexane); R<sub>f</sub> = 0.50 (hexane-ethyl acetate 7:3). NMR (δ in ppm): <sup>1</sup>H NMR (CDCl<sub>3</sub>) 1.01 and 1.41 (2 x s, 6H, CH<sub>3</sub>C), 3.76 (s, 6H, OCH<sub>3</sub>), 3.83 (dd, <sup>2</sup>J<sub>HH</sub> = 10.7 Hz, <sup>3</sup>J<sub>HP</sub> = 7.3 Hz, 2H, H<sub>A</sub>), 4.52 (dd, <sup>2</sup>J<sub>HH</sub> = 10.7 Hz, <sup>3</sup>J<sub>HP</sub> = 18.6 Hz, 2H, H<sub>B</sub>), 6.53 (dd, <sup>3</sup>J<sub>HH</sub> = 8.8 Hz, <sup>4</sup>J<sub>HP</sub> = 3.0 Hz, 4H), 7.34 (dd, <sup>3</sup>J<sub>HP</sub> = 14.1 Hz, <sup>3</sup>J<sub>HH</sub> = 8.8 Hz, 4H); <sup>1</sup>H NMR (C<sub>6</sub>D<sub>6</sub>) 0.13 and 0.95 (2 x s, 6H, CH<sub>3</sub>C), 3.07 (s, 6H, OCH<sub>3</sub>), 3.32 (dd, <sup>2</sup>J<sub>HH</sub> = 10.9 Hz, <sup>3</sup>J<sub>HP</sub> = 7.5 Hz, 2H, H<sub>A</sub>), 4.56 (dd, <sup>2</sup>J<sub>HH</sub> = 11.0 Hz, <sup>3</sup>J<sub>HP</sub> = 18.8 Hz, 2H, H<sub>B</sub>), 6.09 (dd, <sup>3</sup>J<sub>HH</sub> = 8.7 Hz, <sup>4</sup>J<sub>HP</sub> = 3.0 Hz, 4H), 7.31 (dd, <sup>3</sup>J<sub>HP</sub> = 14.0 Hz, <sup>3</sup>J<sub>HH</sub> = 8.7 Hz, 4H); <sup>13</sup>C NMR (CDCl<sub>3</sub>) 21.68 and 21.79 (2 x s, CH<sub>3</sub>), 36.18 (m, <sup>3</sup>J<sub>CP</sub> = 9.6 Hz, CCH<sub>3</sub>), 55.37 (s, CH<sub>3</sub>O), 74.02 (m, <sup>2</sup>J<sub>CP</sub> = 6.7 Hz, OCH<sub>2</sub>), 113.88 (m, <sup>3</sup>J<sub>CP</sub> = 16.8 Hz, C-3'/5'), 124.89 (d, <sup>1</sup>J<sub>CP</sub> = 139.7 Hz, C-1'), 132.18 (m, <sup>2</sup>J<sub>CP</sub> = 13.8 Hz, C2'/6'), 162.65 (m, <sup>4</sup>J<sub>CP</sub> = 3.5 Hz, C-4'); <sup>31</sup>P{<sup>1</sup>H} NMR (MeCN-CH<sub>2</sub>Cl<sub>2</sub> 1:1, 10% C<sub>6</sub>D<sub>6</sub>) 86.09. Calc. for C<sub>19</sub>H<sub>24</sub>O<sub>4</sub>P<sub>2</sub>S<sub>3</sub>: 474.03. Found: 475.1 [M+H]<sup>+</sup>.

**trans-2,4-bis(4-methoxyphenyl)-7,7-dimethyl-1,5,3,2,4-dioxathiadiphosphocane 2,4-disulfide (trans-3b).** Yield: 0.242 g (51%); colourless needles; mp 161-163 °C (from ethyl acetate-hexanes); R<sub>f</sub> = 0.58 (hexane-ethyl acetate 7:3). NMR (δ in ppm): <sup>1</sup>H NMR (CDCl<sub>3</sub>) 1.17 (s, 6H, CCH<sub>3</sub>), 3.74 (dd, <sup>2</sup>J<sub>HH</sub> = 11.0, <sup>3</sup>J<sub>HP</sub> = 8.0 Hz, 2H), 3.87 (s, 6H, OCH<sub>3</sub>), 4.74 (dd, <sup>2</sup>J<sub>HH</sub> = 11.0 Hz, <sup>3</sup>J<sub>HP</sub> = 18.0 Hz, 2H), 6.98 (dd, <sup>3</sup>J<sub>HH</sub> = 8.8 Hz, <sup>4</sup>J<sub>HP</sub> = 2.9 Hz, 4H), 7.93 (dd, <sup>3</sup>J<sub>HP</sub> = 14.1 Hz, <sup>3</sup>J<sub>HH</sub> = 8.8 Hz, 4H, ArH); <sup>1</sup>H NMR (C<sub>6</sub>D<sub>6</sub>) 0.64 (s, 6H, CCH<sub>3</sub>), 3.05 (s, 6H, OCH<sub>3</sub>), 3.37 (dd, <sup>2</sup>J<sub>HH</sub> = 10.8, <sup>3</sup>J<sub>HP</sub> = 7.3 Hz, 2H), 4.76 (dd, <sup>2</sup>J<sub>HH</sub> = 10.8 Hz, <sup>3</sup>J<sub>HP</sub> = 17.5 Hz, 2H), 6.61 (dd, <sup>3</sup>J<sub>HH</sub> = 8.8 Hz, <sup>4</sup>J<sub>HP</sub> = 3.0 Hz, 4H), 8.07 (dd, <sup>3</sup>J<sub>HP</sub> = 13.9 Hz, <sup>3</sup>J<sub>HH</sub> = 8.7 Hz, 4H, ArH); <sup>13</sup>C NMR (CDCl<sub>3</sub>) 22.37 (s, CH<sub>3</sub>), 36.24 (m, <sup>3</sup>J<sub>CP</sub> = 10.5 Hz, CCH<sub>3</sub>), 55.72 (s, C-7'), 71.82 (m, <sup>2</sup>J<sub>CP</sub> = 6.4 Hz, OCH<sub>2</sub>), 114.05 (m, <sup>3</sup>J<sub>CP</sub> = 16.8 Hz, C-3'/5'), 125.35 (d, <sup>1</sup>J<sub>CP</sub> = 136 Hz, C-1'), 133.34 (m, <sup>2</sup>J<sub>CP</sub> = 14.0 Hz, C2'/6'), 163.47 (m, <sup>4</sup>J<sub>CP</sub> = 3.5 Hz, C-4'); <sup>31</sup>P{<sup>1</sup>H} NMR (MeCN-CH<sub>2</sub>Cl<sub>2</sub> 1:1, 10% C<sub>6</sub>D<sub>6</sub>) 87.70. Calc. for C<sub>19</sub>H<sub>24</sub>O<sub>4</sub>P<sub>2</sub>S<sub>3</sub>: 474.03. Found: 475.1 [M+H]<sup>+</sup>.

**cis-2,4-bis(4-methoxyphenyl)-1,5,3,2,4-dioxathiadiphosphonane 2,4-disulfide (cis-3c).** Yield: 0.170 g (37%); colourless prisms; mp 197-199 °C (from benzene-cyclohexane); R<sub>f</sub> = 0.52 (hexane-ethyl acetate 7:3). NMR (δ in ppm): <sup>1</sup>H NMR (CDCl<sub>3</sub>) 2.17 (m, 2H, CH<sub>2</sub>), 2.27 (m, 2H, CH<sub>2</sub>), 3.76 (s, 6H, OCH<sub>3</sub>), 4.21 (m, 2H, OCH<sub>2</sub>), 4.91 (m, 2H, OCH<sub>2</sub>), 6.55 (dd, <sup>3</sup>J<sub>HH</sub> = 8.8 Hz, <sup>4</sup>J<sub>HP</sub> = 3.5 Hz, 4H, ArH), 7.37 (dd, <sup>3</sup>J<sub>HP</sub> = 14.2 Hz, <sup>3</sup>J<sub>HH</sub> = 8.8 Hz, 4H, ArH); <sup>13</sup>C NMR (CDCl<sub>3</sub>) 27.90 (m, <sup>3</sup>J<sub>CP</sub> = 4.4 Hz, CH<sub>2</sub>CH<sub>2</sub>O), 55.15 (s, CH<sub>3</sub>O), 67.38 (m, <sup>2</sup>J<sub>CP</sub> = 7.2 Hz, OCH<sub>2</sub>), 113.55 (m, <sup>3</sup>J<sub>CP</sub> = 16.9 Hz, C-3'/5'), 125.61 (m, <sup>1</sup>J<sub>CP</sub> = 137.4 Hz, C-1'), 132.06 (m, <sup>2</sup>J<sub>CP</sub> = 14.0 Hz, C2'/6'), 162.27 (m, <sup>4</sup>J<sub>CP</sub> = 3.7 Hz, C-4'); <sup>31</sup>P{<sup>1</sup>H} NMR (MeCN-CH<sub>2</sub>Cl<sub>2</sub> 1:1, 10% C<sub>6</sub>D<sub>6</sub>) 85.6 (<sup>2</sup>J<sub>PP</sub> = -21 Hz). Calc. for C<sub>18</sub>H<sub>22</sub>O<sub>4</sub>P<sub>2</sub>S<sub>3</sub>: 460.02. Found: 461.1 [M+H]<sup>+</sup>.

**trans-2,4-bis(4-methoxyphenyl)-1,5,3,2,4-dioxathiadiphosphonane 2,4-disulfide (trans-3c).** Yield: 0.110 g (24%); colourless needles; mp 171-172 °C (from ethyl acetate-cyclohexane); R<sub>f</sub> = 0.57 (hexane-ethyl acetate 7:3). NMR (δ in ppm): <sup>1</sup>H NMR (CDCl<sub>3</sub>) 2.06 (m, 2H, CH<sub>2</sub>), 2.22 (m, 2H, CH<sub>2</sub>), 3.86 (s, 6H, OCH<sub>3</sub>), 4.20 (m, 2H, OCH<sub>2</sub>), 4.95 (m, 2H, OCH<sub>2</sub>), 6.96 (dd, <sup>3</sup>J<sub>HH</sub> = 8.8 Hz, <sup>4</sup>J<sub>HP</sub> = 3.5 Hz, 4H, ArH), 7.89 (dd, <sup>3</sup>J<sub>HP</sub> = 14.2 Hz, <sup>3</sup>J<sub>HH</sub> = 8.8 Hz, 4H, ArH); <sup>13</sup>C NMR (CDCl<sub>3</sub>) 27.36 (m, <sup>3</sup>J<sub>PC</sub> = 5.3 Hz, CH<sub>2</sub>CH<sub>3</sub>), 55.69 (s, CH<sub>3</sub>O), 68.09 (m, <sup>2</sup>J<sub>CP</sub> = 7.1 Hz, OCH<sub>2</sub>), 114.05 (m, <sup>3</sup>J<sub>CP</sub> = 16.8 Hz, C-3'/5'), 127.66 (d, <sup>1</sup>J<sub>CP</sub> = 135.2 Hz, C-1'), 133.08 (m, <sup>2</sup>J<sub>CP</sub> = 14.1 Hz, C2'/6'), 163.24 (s, C-4'); <sup>31</sup>P{<sup>1</sup>H} NMR (MeCN-CH<sub>2</sub>Cl<sub>2</sub> 1:1, 10% C<sub>6</sub>D<sub>6</sub>) 86.5 (<sup>2</sup>J<sub>PP</sub> = -14 Hz). Calc. for C<sub>18</sub>H<sub>22</sub>O<sub>4</sub>P<sub>2</sub>S<sub>3</sub>: 460.02. Found: 461.1 [M+H]<sup>+</sup>.

**2-(4-methoxyphenyl)-1,3,2-dioxaphospholane 2-sulfide (4a)** (Method B). Yield: 0.075 g (30%); colourless prisms; mp 84-85 °C (from ethyl acetate-cyclohexane, lit. <sup>14</sup> m.p 76 °C);  $R_f = 0.27$  (hexane-ethyl acetate 7:3). NMR ( $\delta$  in ppm): <sup>1</sup>H NMR (CDCl<sub>3</sub>) 3.89 (s, 3H, OCH<sub>3</sub>), 4.43 (m, 2H, OCH<sub>2</sub>), 4.62 (m, 2H, OCH<sub>2</sub>), 6.99 (dd, <sup>3</sup> $J_{HH} = 8.8$  Hz, <sup>4</sup> $J_{HP} = 3.4$  Hz, 4H, ArH), 7.85 (dd, <sup>3</sup> $J_{HP} = 14.3$  Hz, <sup>3</sup> $J_{HH} = 8.8$  Hz, 4H, ArH); <sup>13</sup>C NMR (CDCl<sub>3</sub>) 55.32 (s, CH<sub>3</sub>O), 66.77 (d, <sup>2</sup> $J_{CP} = 7.1$  Hz, OCH<sub>2</sub>), 113.82 (d, <sup>3</sup> $J_{CP} = 16.5$  Hz, C-3'/5'), 123.97 (d, <sup>1</sup> $J_{CP} = 145.0$  Hz, C-1'), 133.28 (d, <sup>2</sup> $J_{CP} = 14.4$  Hz, C2'/6'), 163.26 (d, <sup>4</sup> $J_{CP} = 3.3$  Hz, C-4'); <sup>31</sup>P NMR (CDCl<sub>3</sub>) 106.5 (tddd, <sup>3</sup> $J_{PH} = 23.4$ , <sup>3</sup> $J_{PH'} = 14.3$ , <sup>4</sup> $J_{PH'} = 3.4$ , <sup>3</sup> $J_{PH} = 1.4$  Hz).

# NMR Spectra and NMR spectral parameters of Compounds 2 - 4

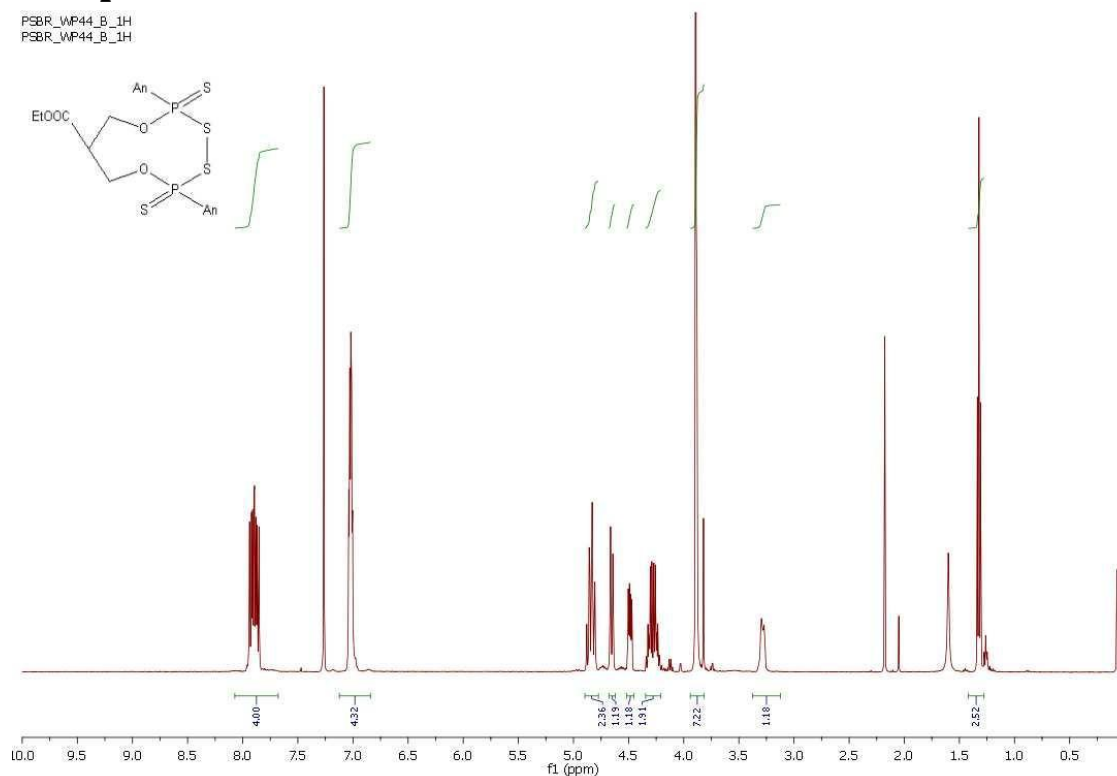

Figure

## S1. <sup>1</sup>H NMR spectrum of 2b' in CDCl<sub>3</sub>

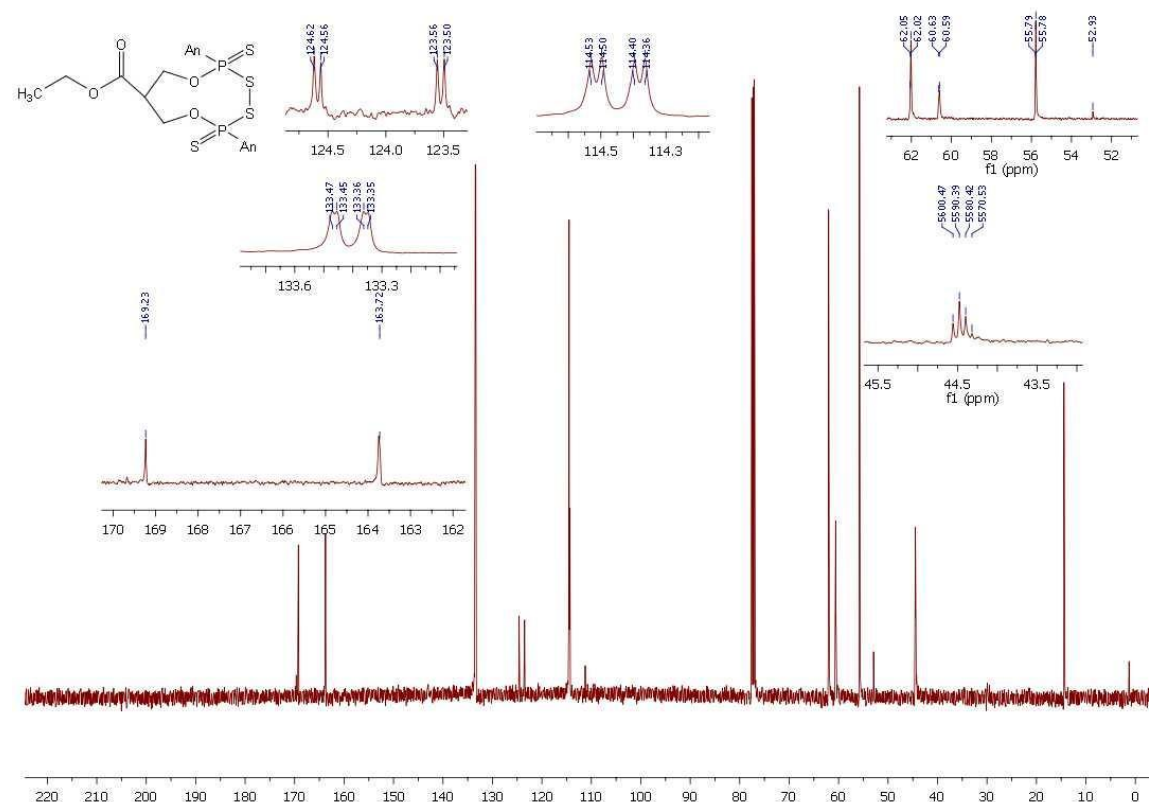

Figure S2. <sup>13</sup>C NMR spectrum of 2b' in CDCl<sub>3</sub>



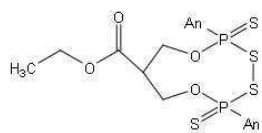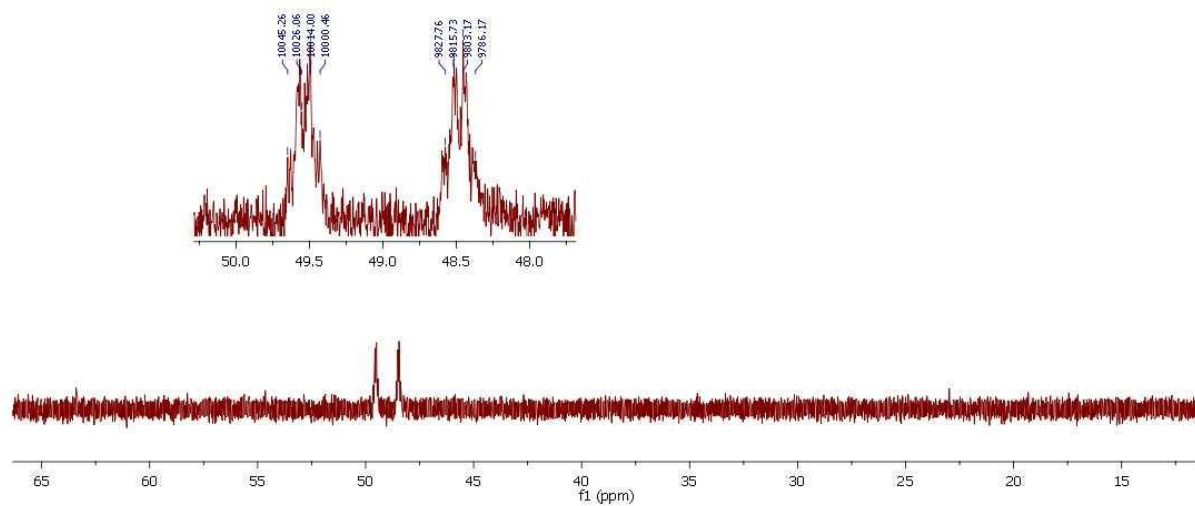

Figure S3. <sup>31</sup>P {<sup>1</sup>H} NMR spectrum of **2b'** in CDCl<sub>3</sub>

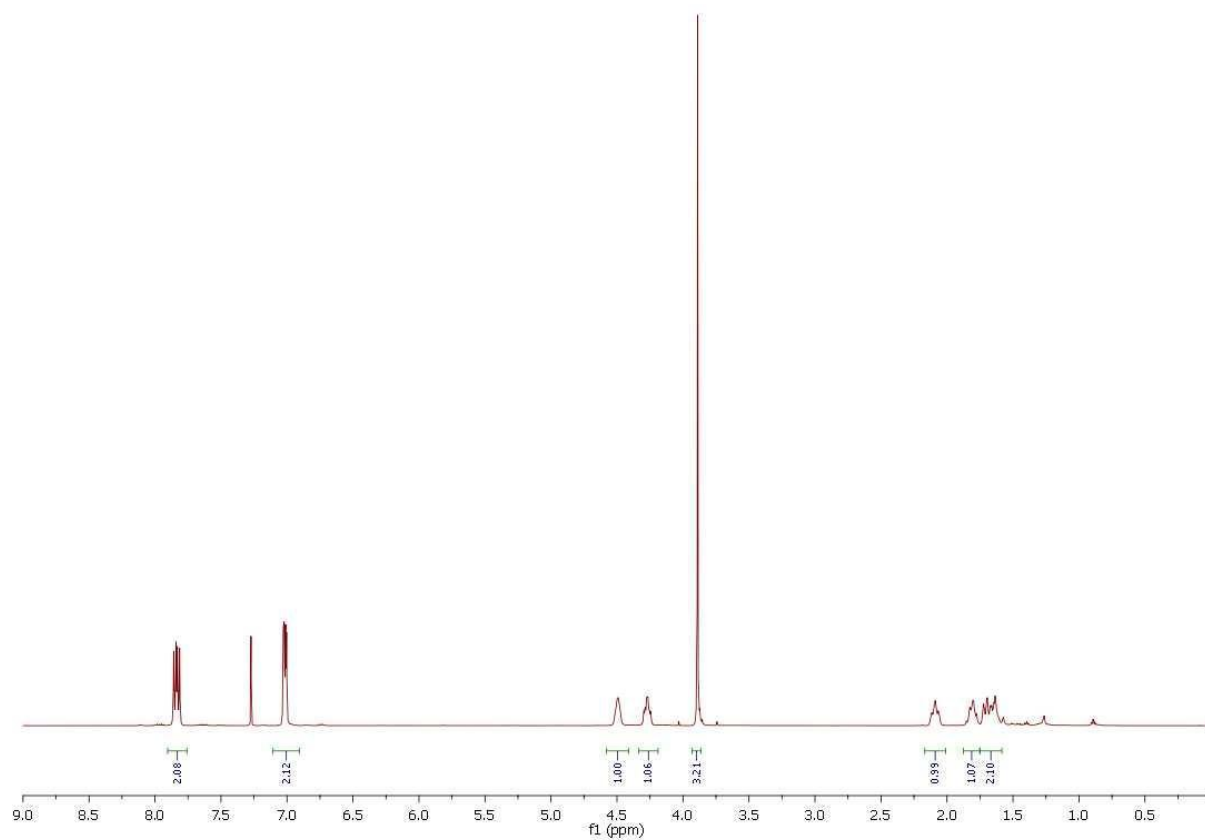

Figure S4. <sup>1</sup>H NMR spectrum of **2d** in CDCl<sub>3</sub>

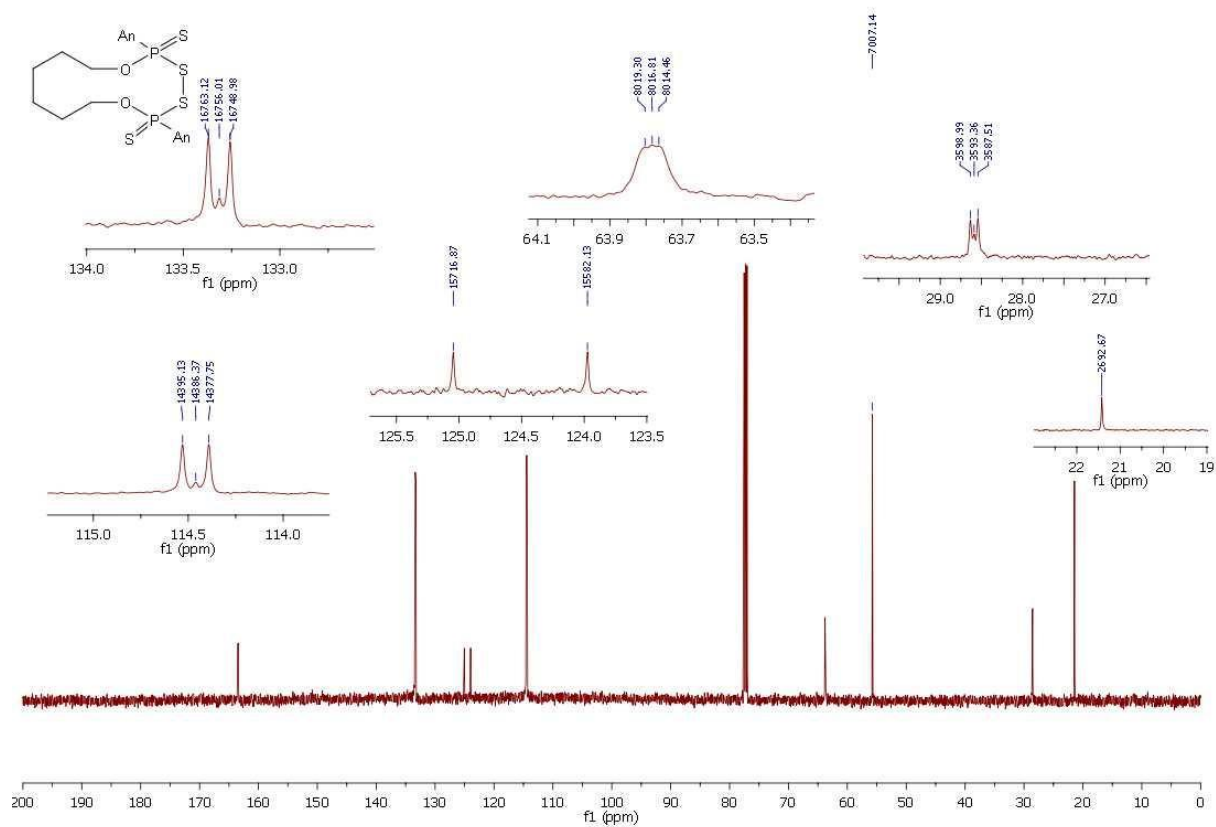

Figure S5.  $^{13}\text{C}$  NMR spectrum of **2d** in  $\text{CDCl}_3$

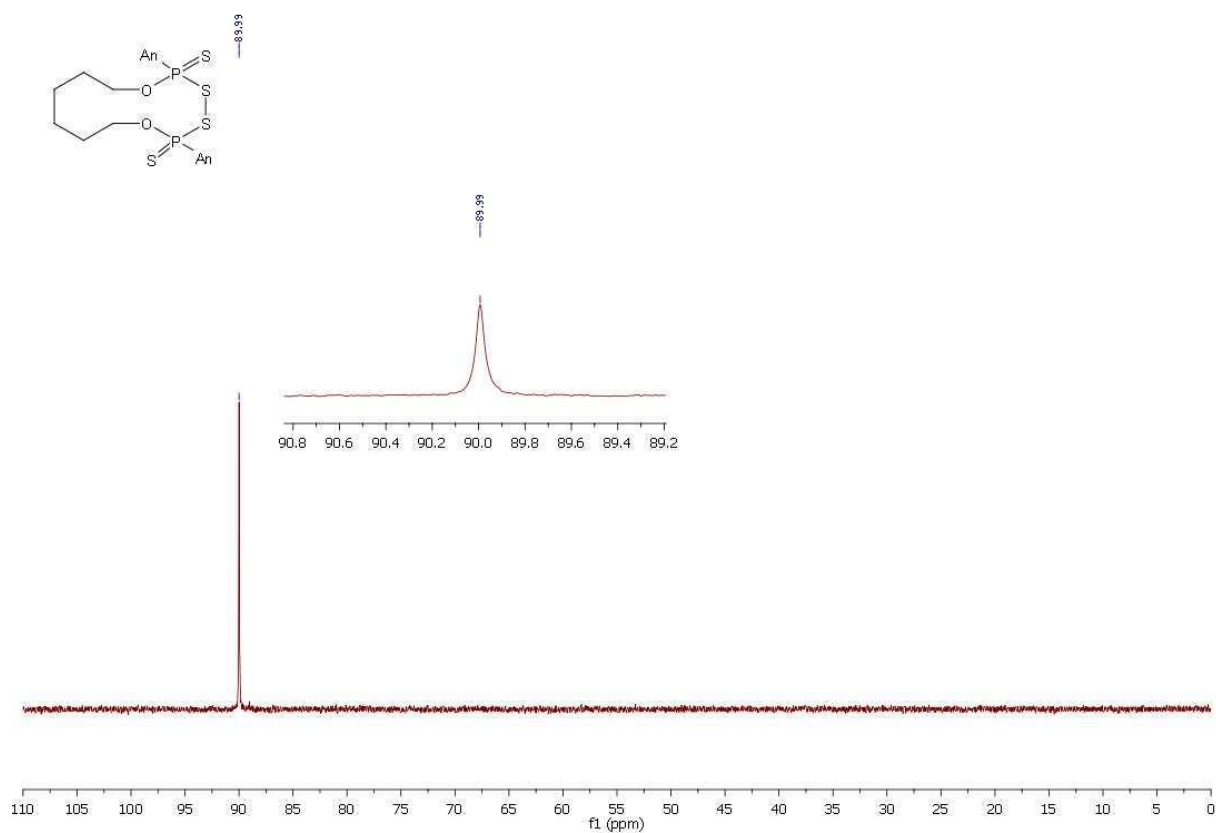

Figure S6.  $^{31}\text{P}$  NMR spectrum of **2d** in  $\text{CDCl}_3$

Z-590  
1H

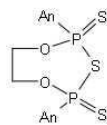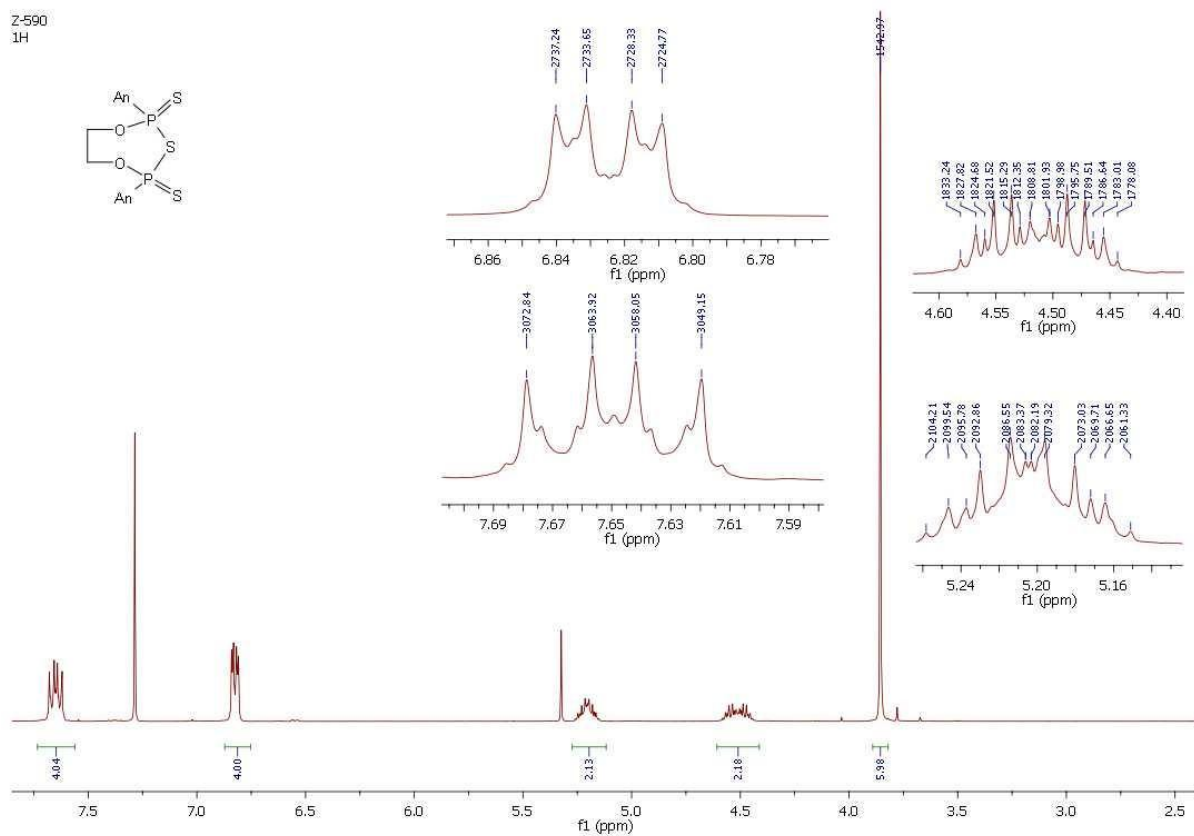

Figure S7.  $^1\text{H}$  NMR spectrum of *cis*-**3a** in  $\text{CDCl}_3$

Z-590  
13C

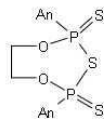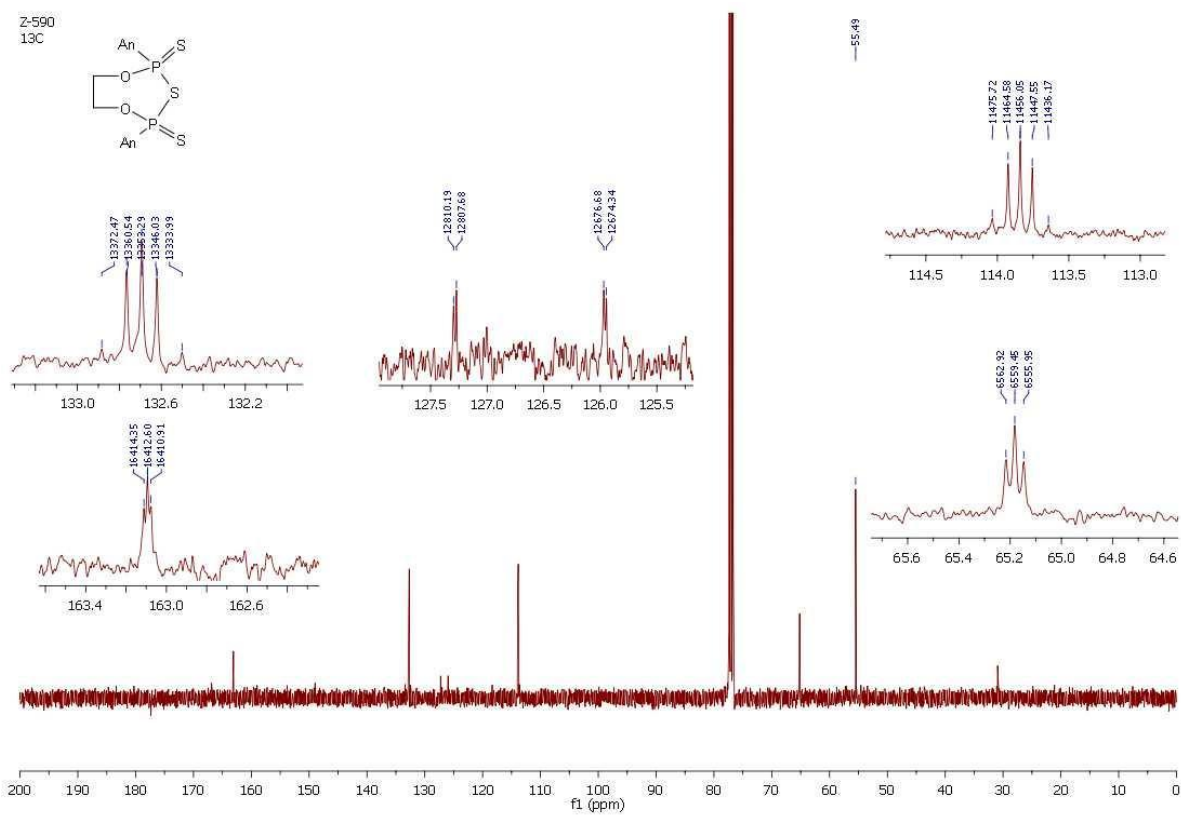

Figure S8.  $^{13}\text{C}$  NMR spectrum of *cis*-**3a** in  $\text{CDCl}_3$

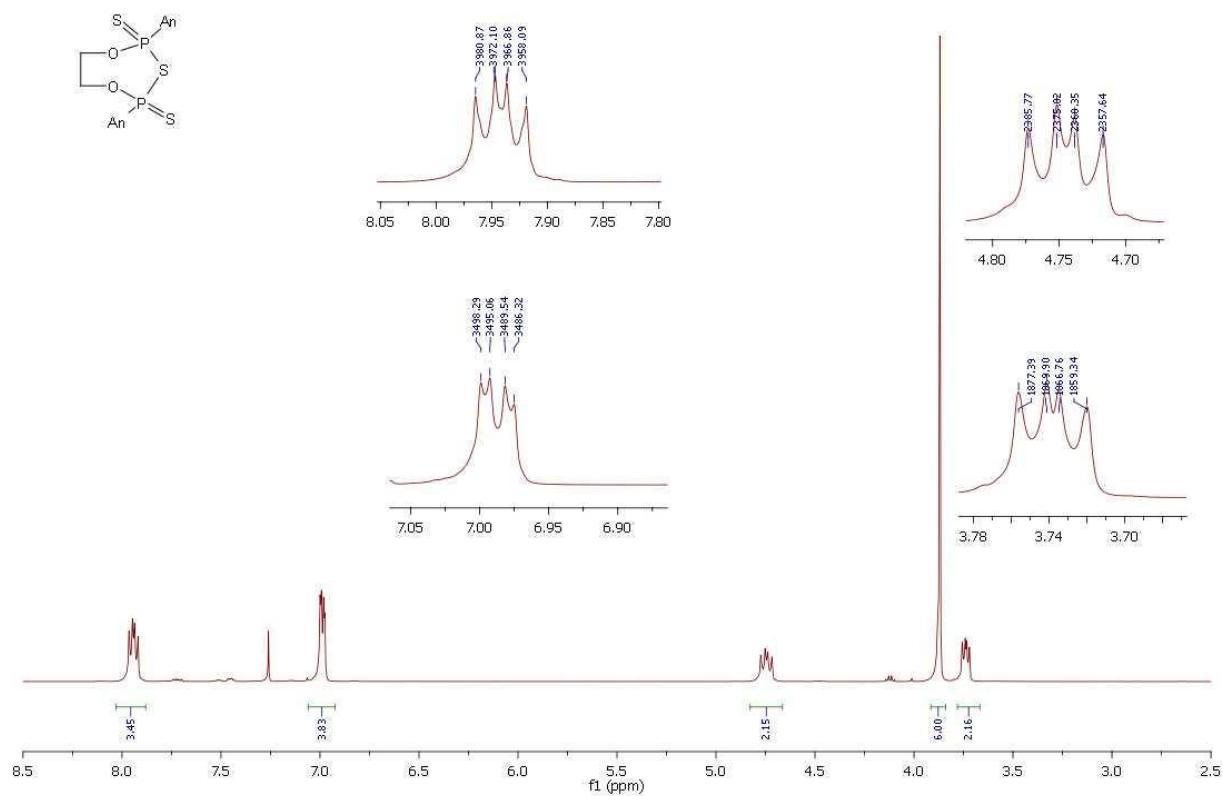

Figure S9. <sup>1</sup>H NMR spectrum of *trans*-3a in CDCl<sub>3</sub>

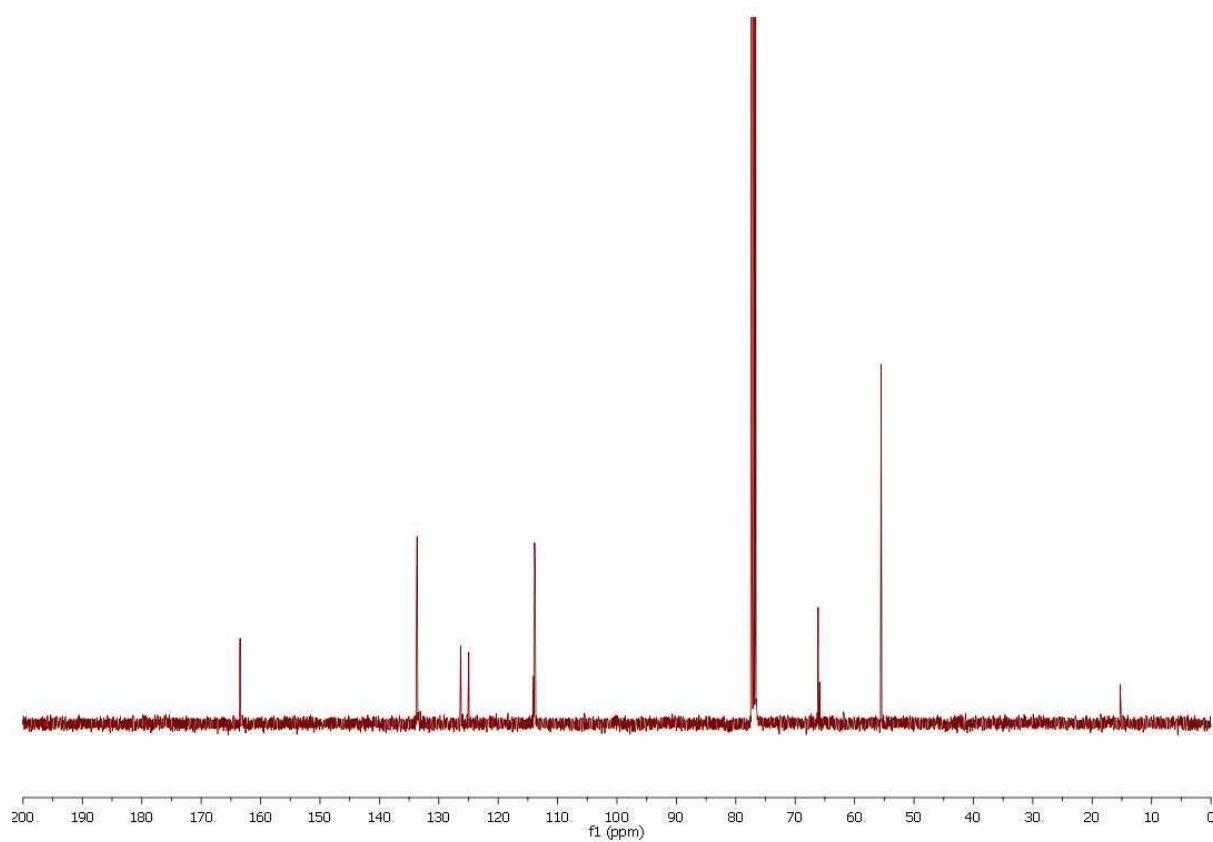

Figure S10. <sup>13</sup>C NMR spectrum of *trans*-3a in CDCl<sub>3</sub>

B4\_13\_18  
B4\_13\_18  
CDCl3 12.04.2013

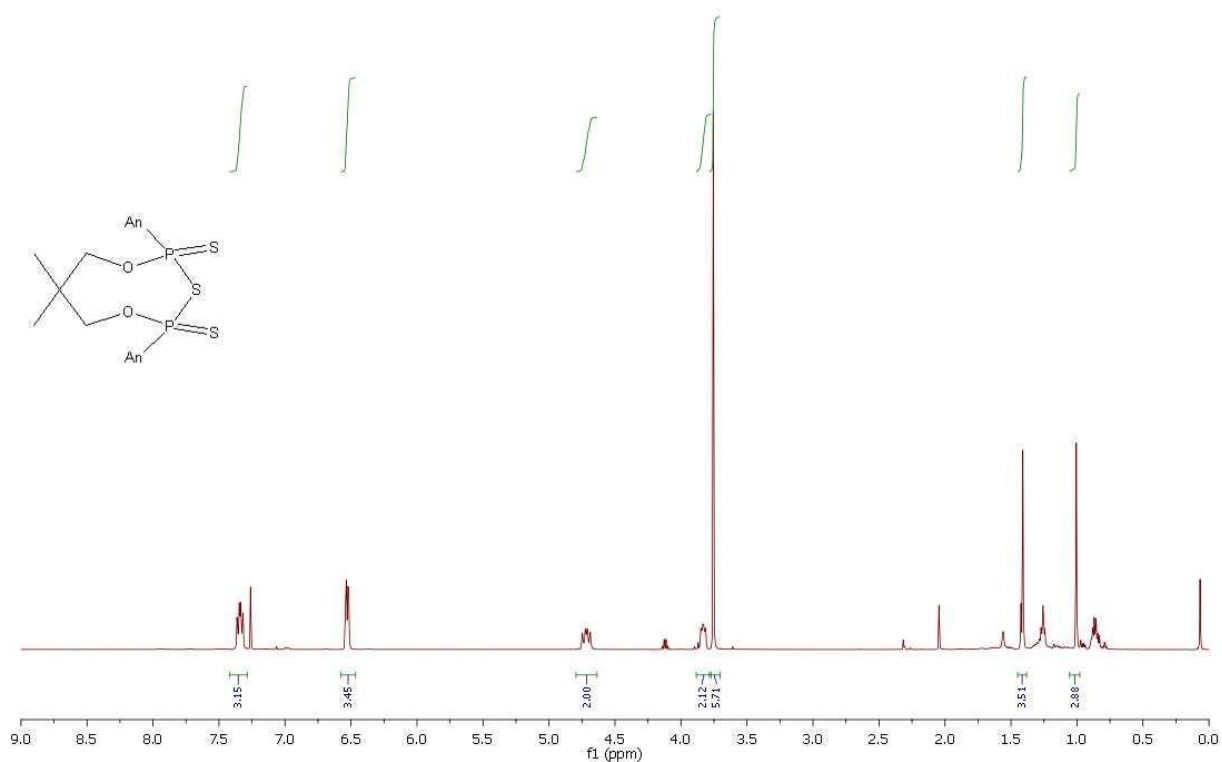

Figure S11. <sup>1</sup>H NMR spectrum of *cis*-**3b** in CDCl<sub>3</sub>

204R9C  
204R9C  
CDCl3  
9.9.2013

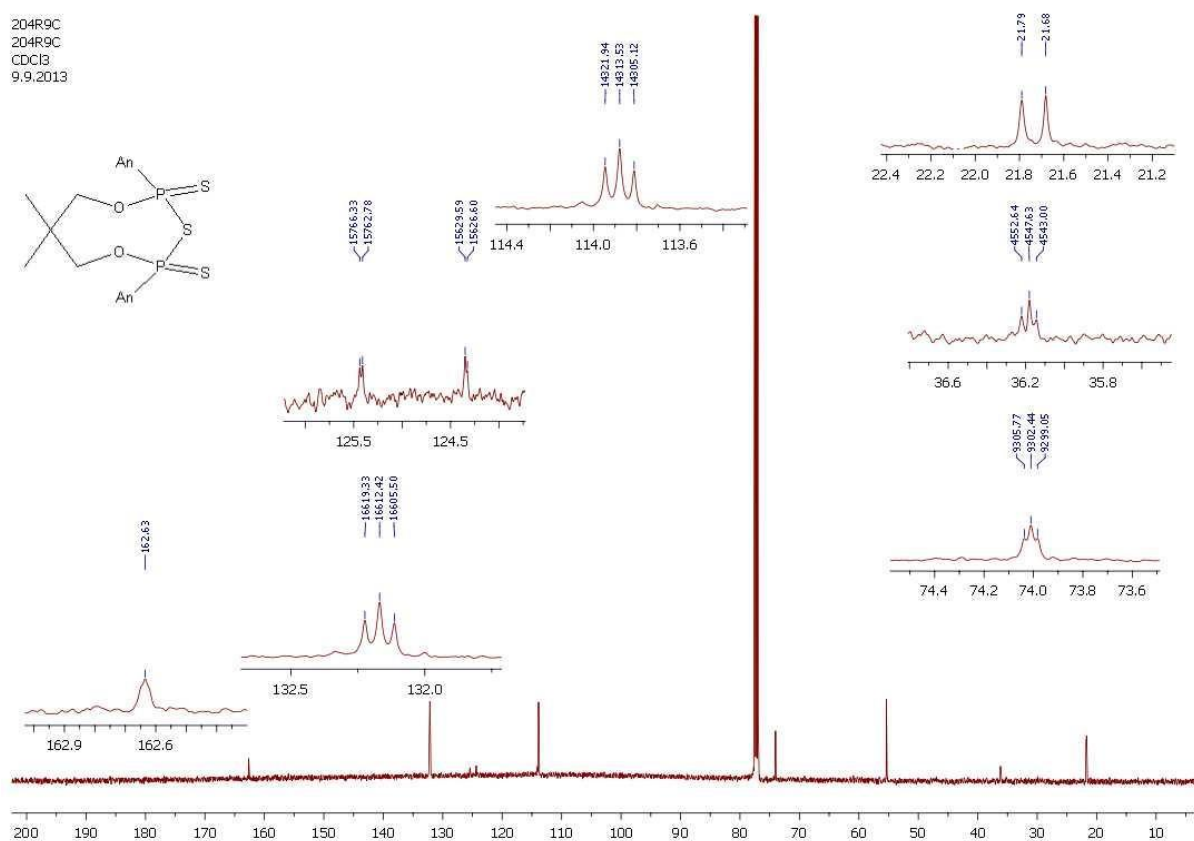

Figure S12. <sup>13</sup>C NMR spectrum of *cis*-**3b** in CDCl<sub>3</sub>

B4\_10\_11  
B4\_10\_11  
CDC1312.04.2013

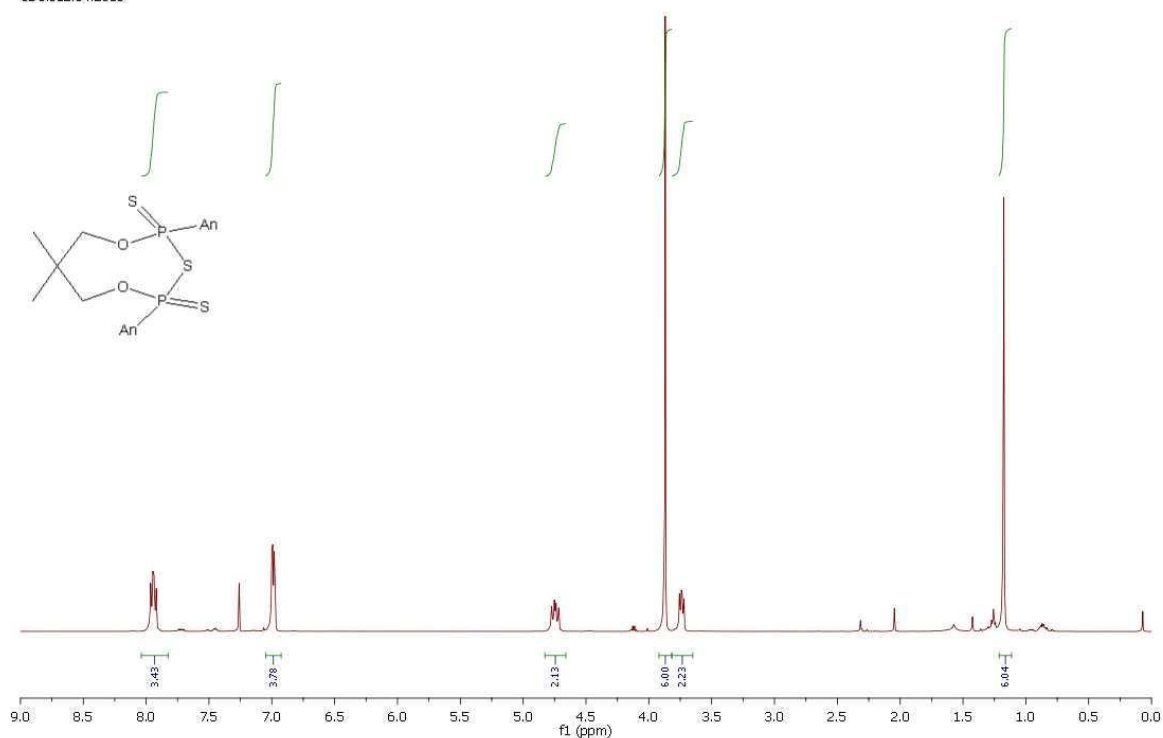

Figure S13. <sup>1</sup>H NMR spectrum of *trans*-3b in CDCl<sub>3</sub>

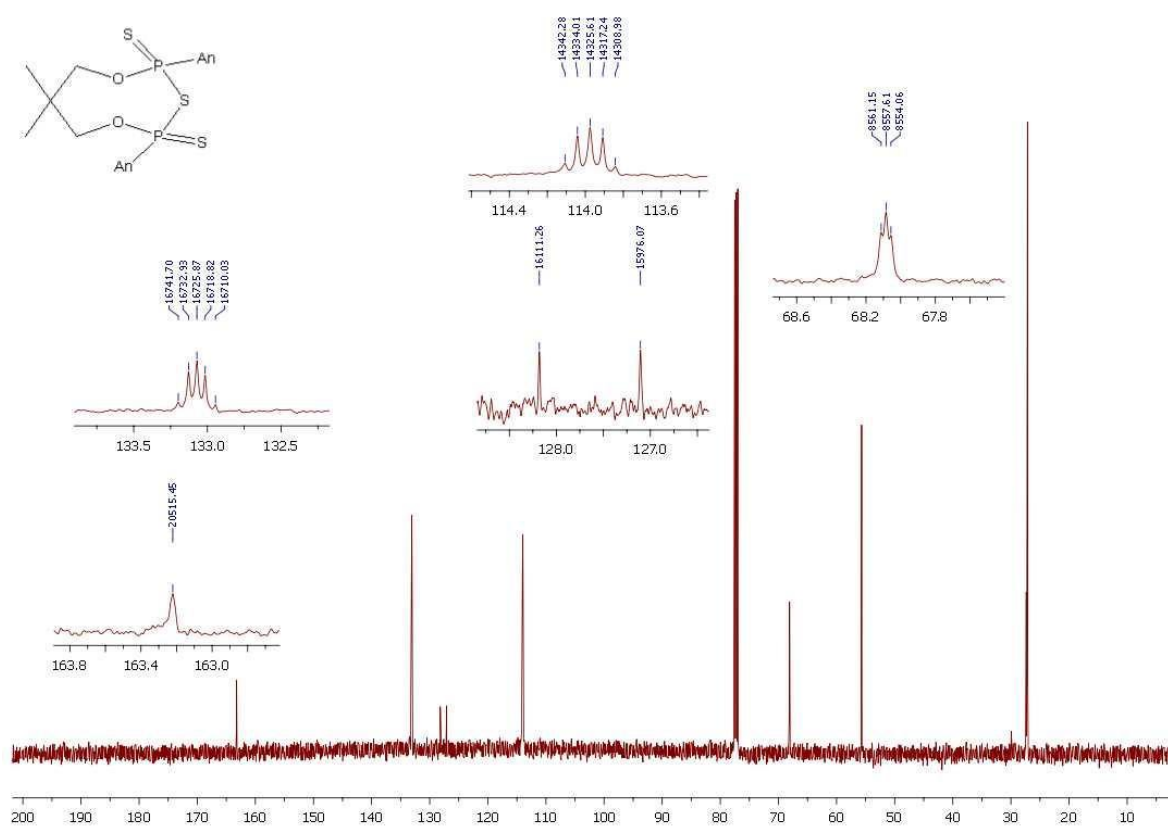

Figure S14. <sup>13</sup>C NMR spectrum of *trans*-3b in CDCl<sub>3</sub>

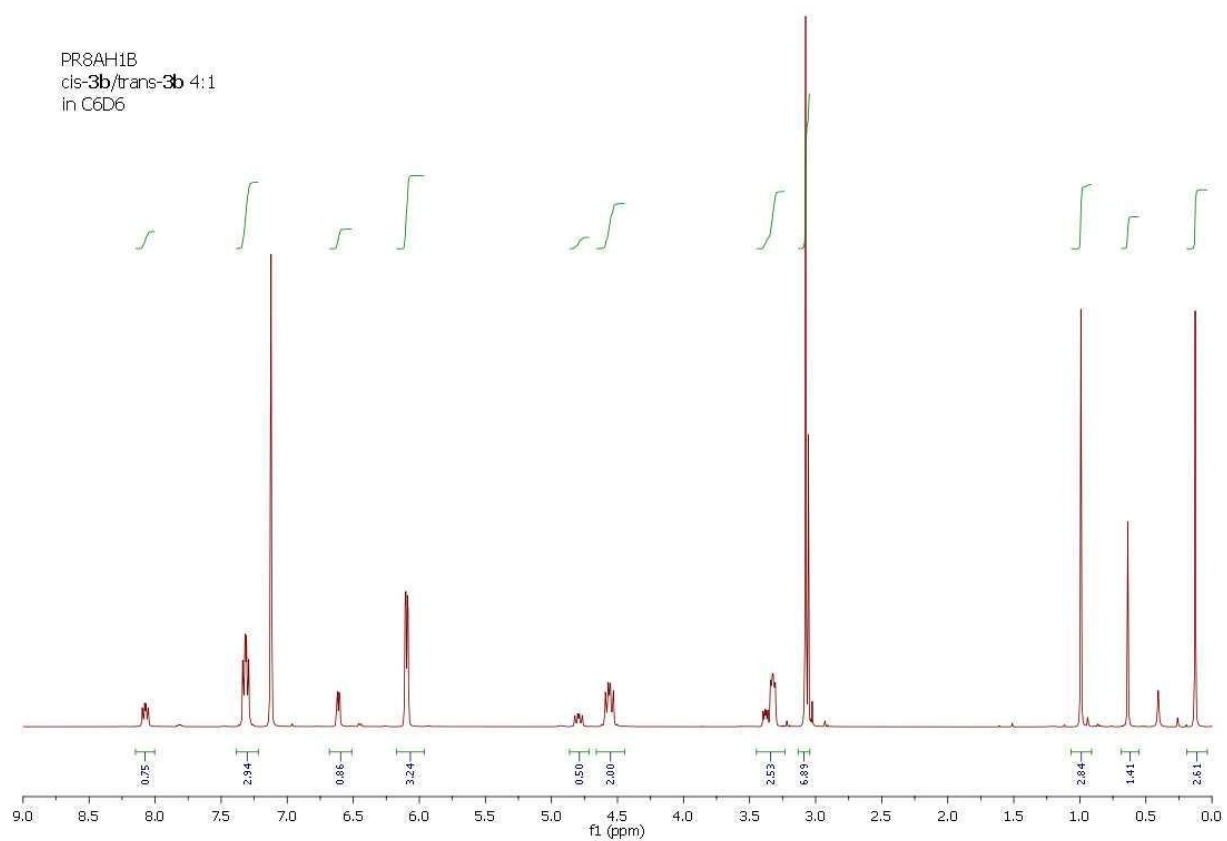

**Figure S15.**  $^1\text{H}$  NMR spectrum of a crude mixture of *cis*-**3b** and *trans*-**3b** (4:1) in  $\text{C}_6\text{D}_6$

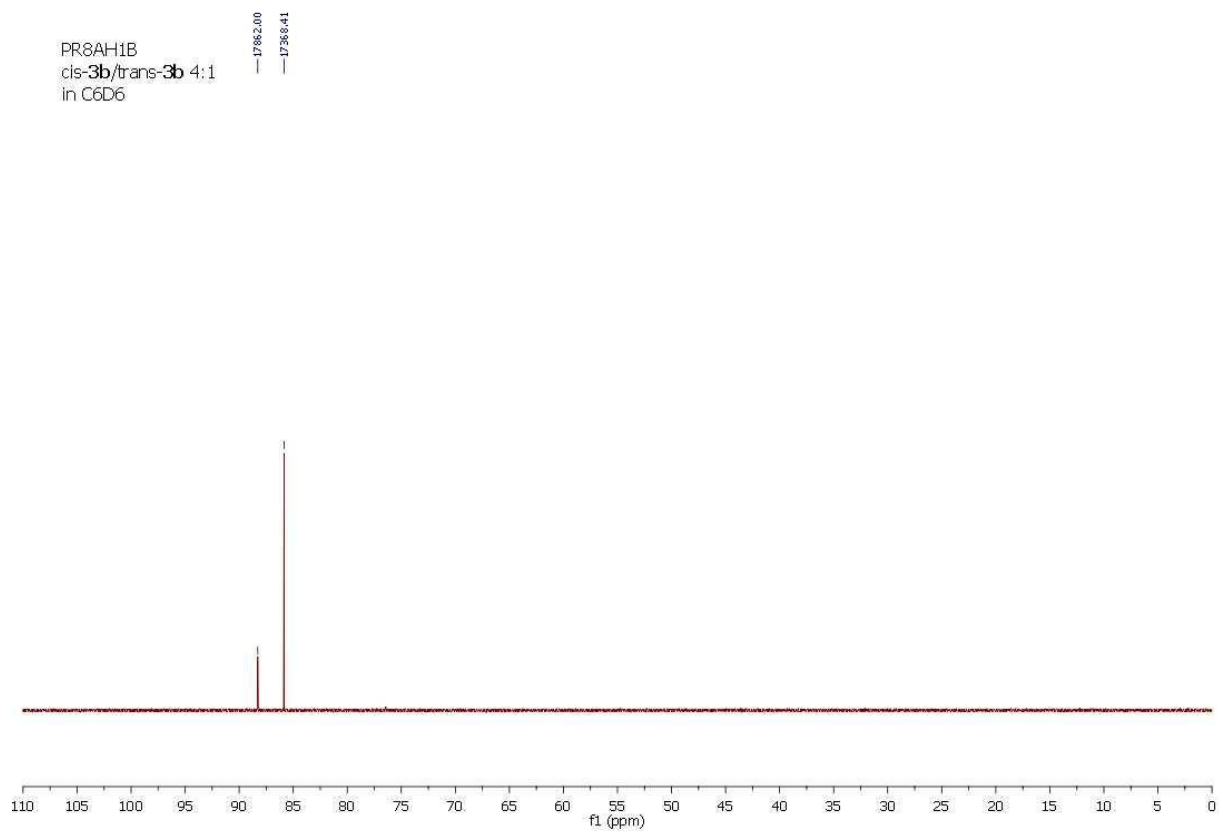

**Figure S16.**  $^{31}\text{P}$  NMR spectrum of a crude mixture of *cis*-**3b** and *trans*-**3b** (4:1) in  $\text{C}_6\text{D}_6$

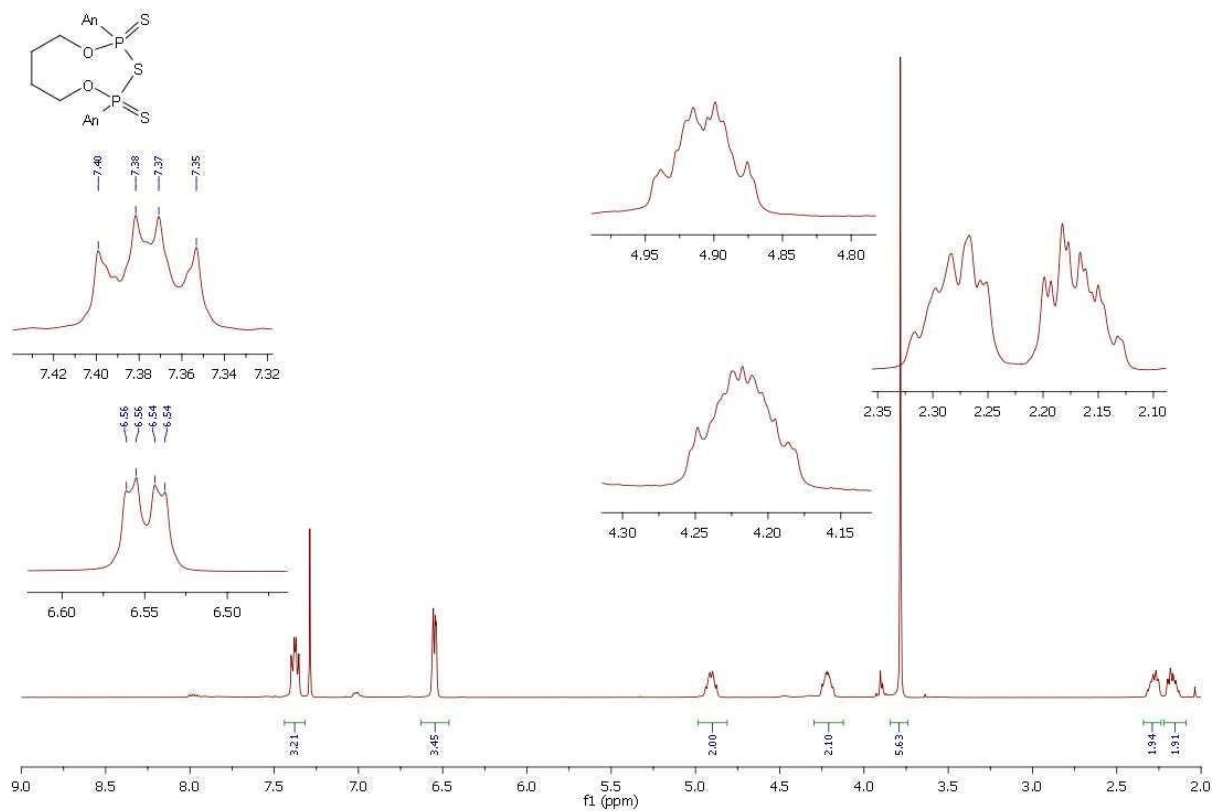

Figure S17.  $^1\text{H}$  NMR spectrum of *cis*-**3c** in CDCl<sub>3</sub>

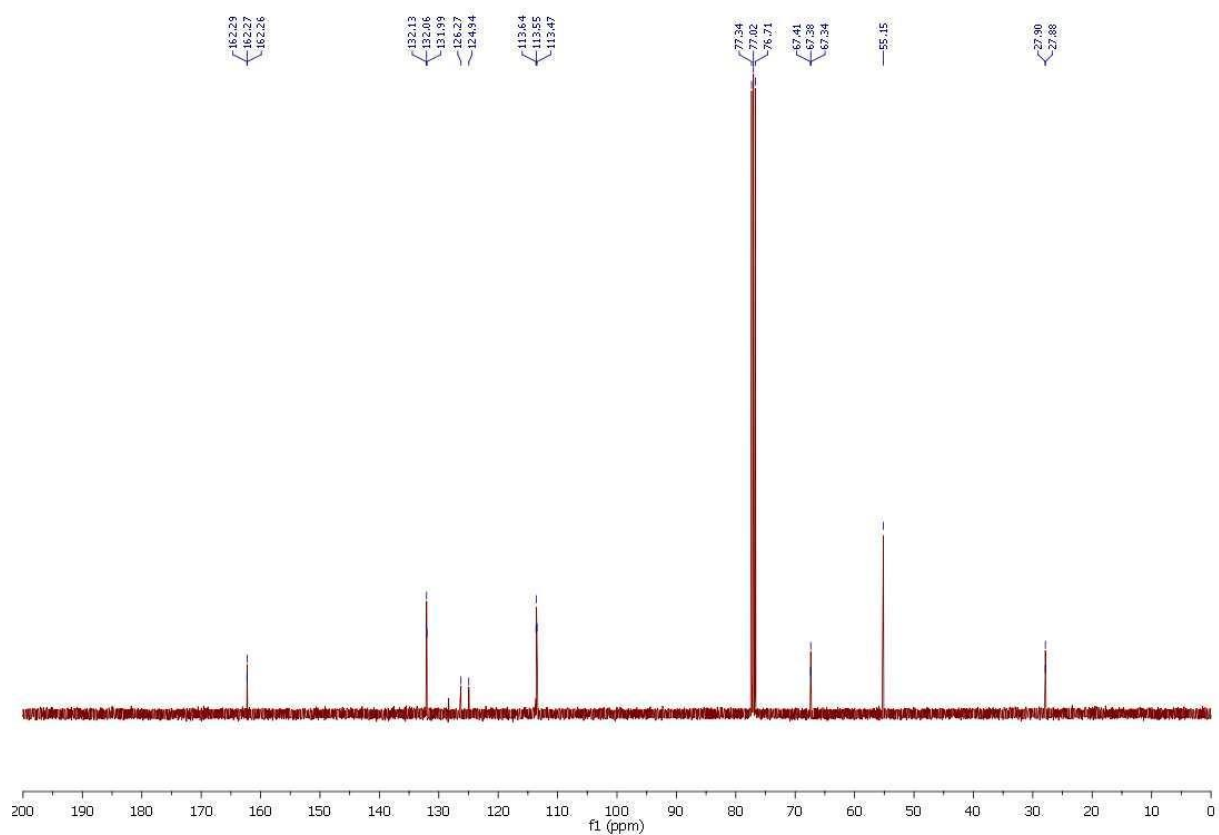

Figure S18.  $^{13}\text{C}$  NMR spectrum of *cis*-**3c** in CDCl<sub>3</sub>



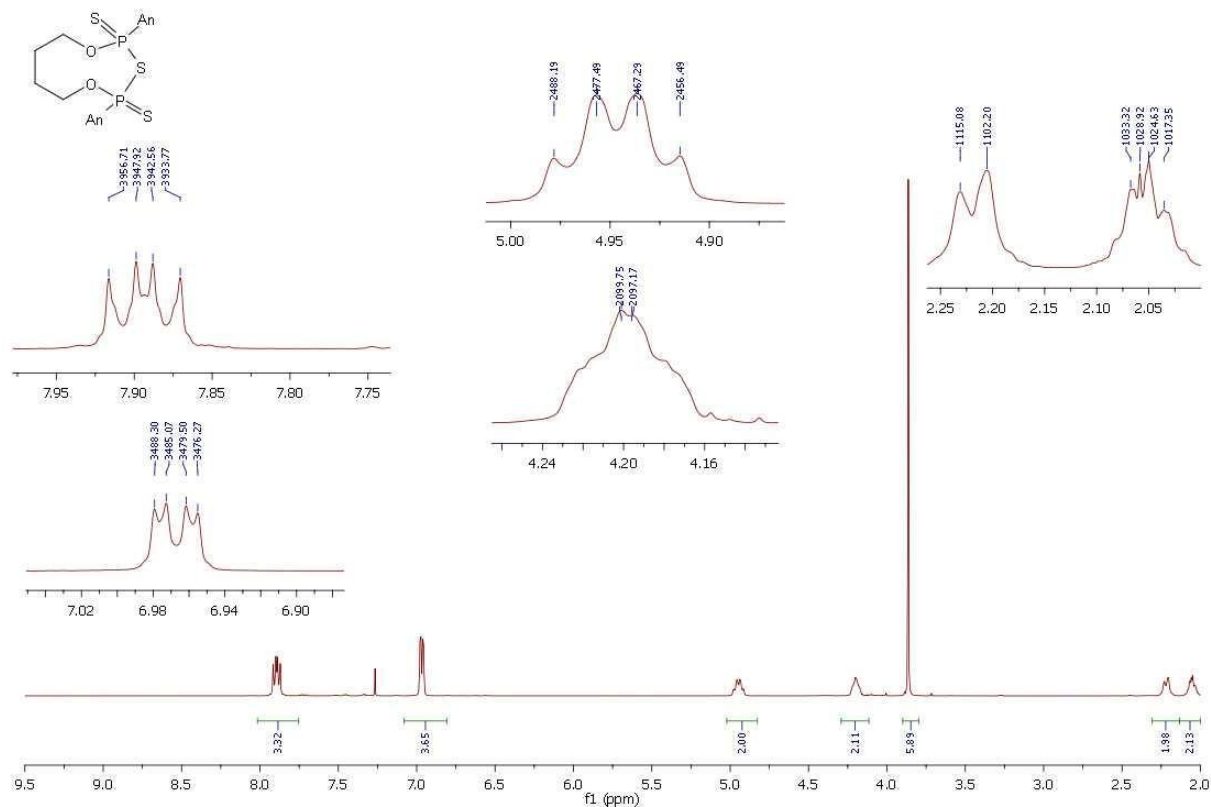

Figure S19. <sup>1</sup>H NMR spectrum of *trans*-**3c** in CDCl<sub>3</sub>

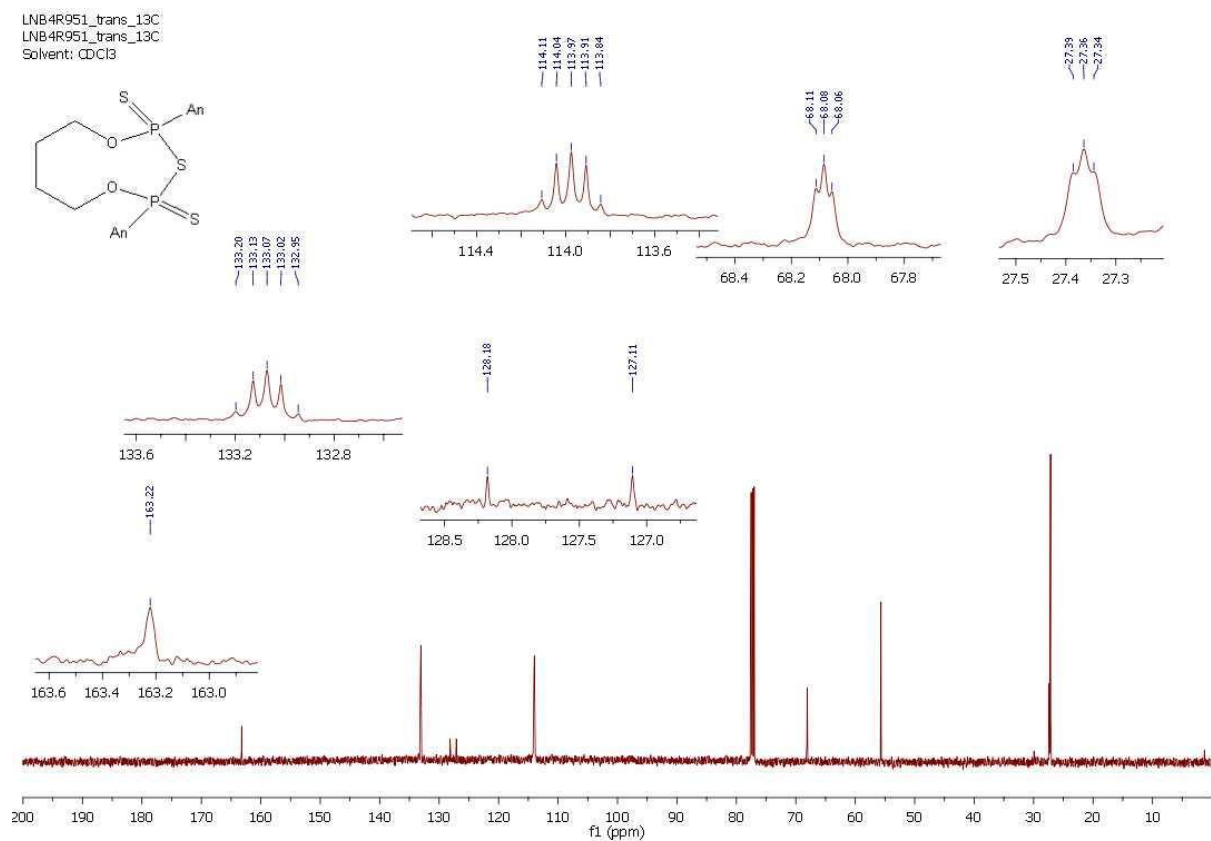

Figure S20. <sup>13</sup>C NMR spectrum of *trans*-**3c** in CDCl<sub>3</sub>

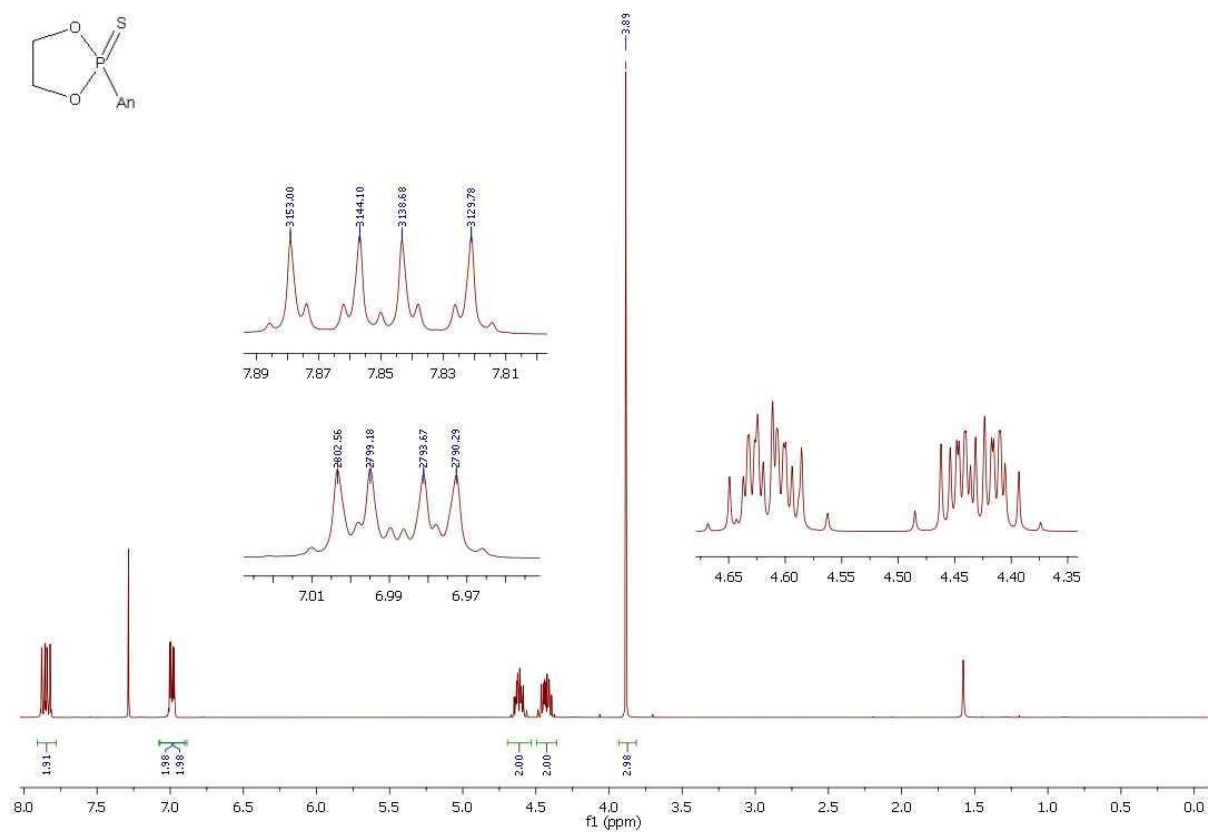

**Figure S21.** <sup>1</sup>H NMR spectrum of **4a** in CDCl<sub>3</sub>

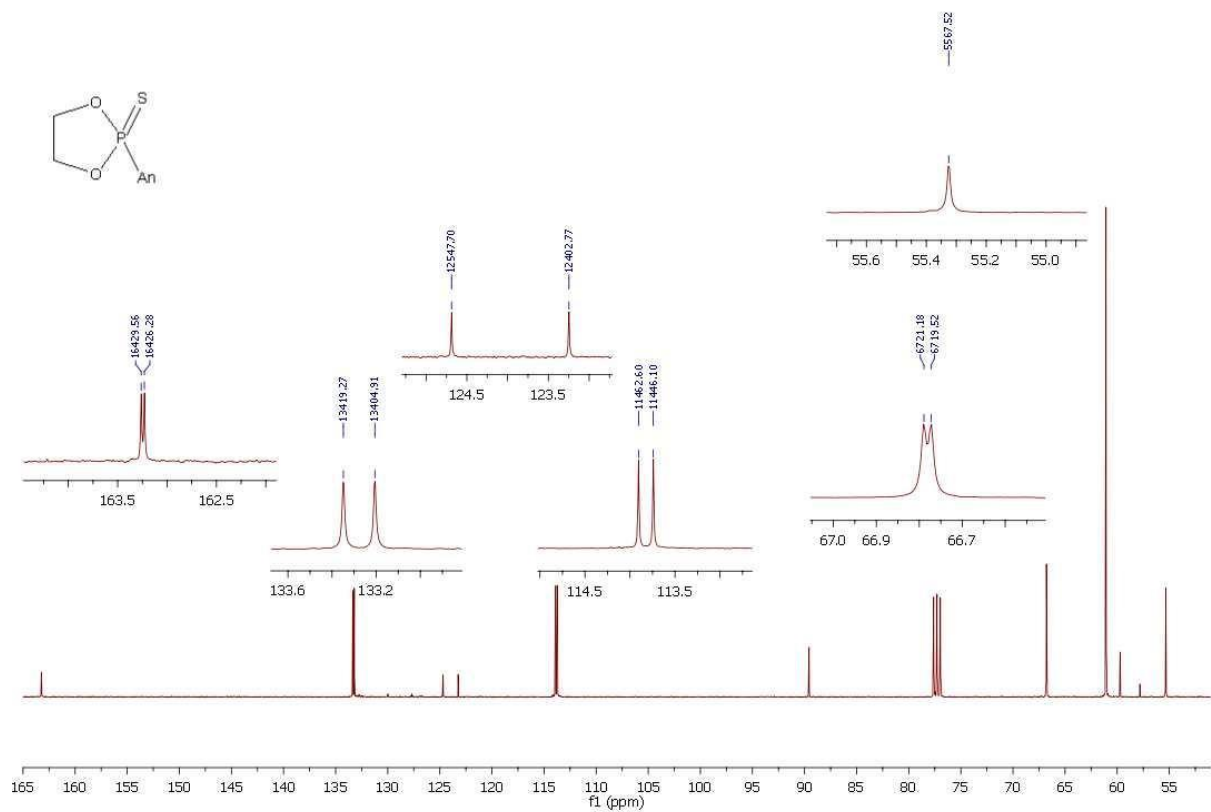

**Figure S22.** <sup>13</sup>C NMR spectrum of **4a** in CDCl<sub>3</sub>

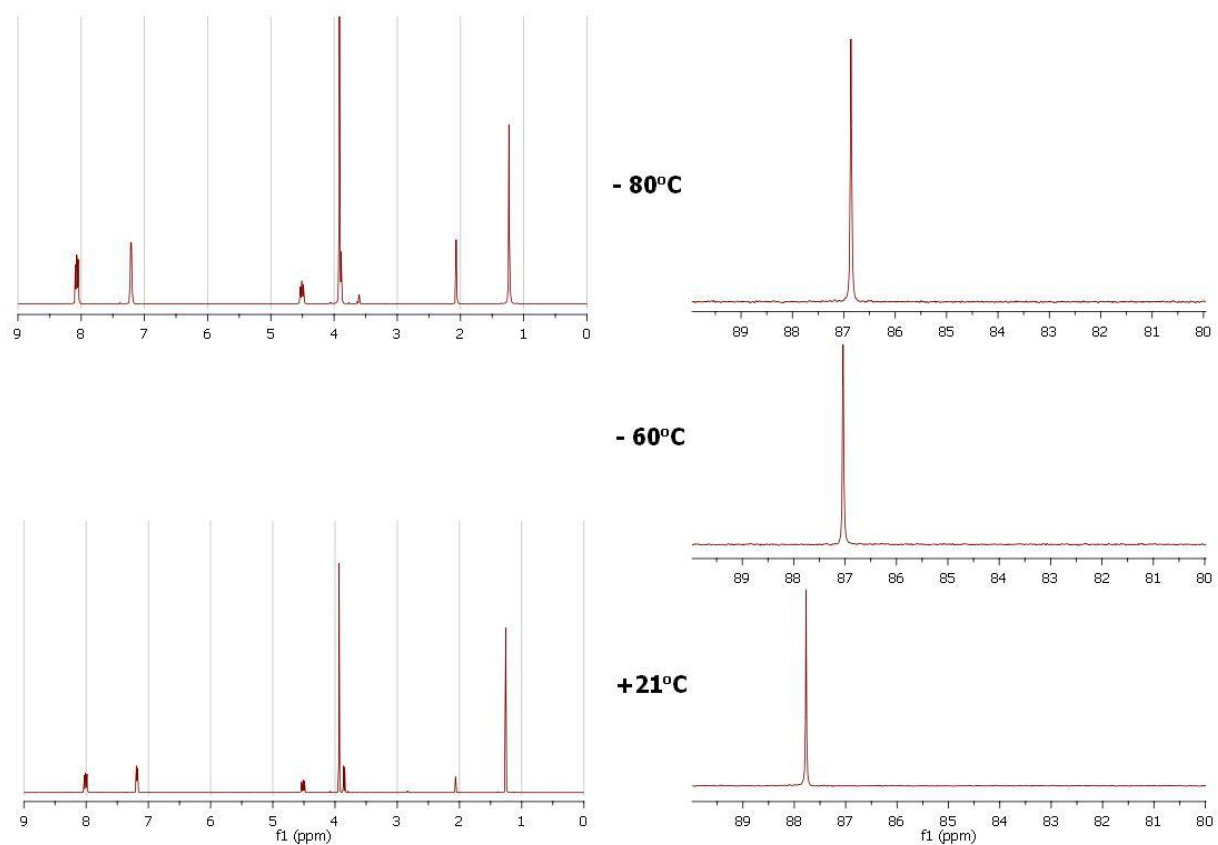

**Figure S23.** Comparing the  $^1\text{H}$  NMR (a-b) and  $^{31}\text{P}$  NMR (c-e) spectra of disulfane **2b** solution in acetone- $\text{d}_6$  recorded at cryogenic temperatures and at room temperature.

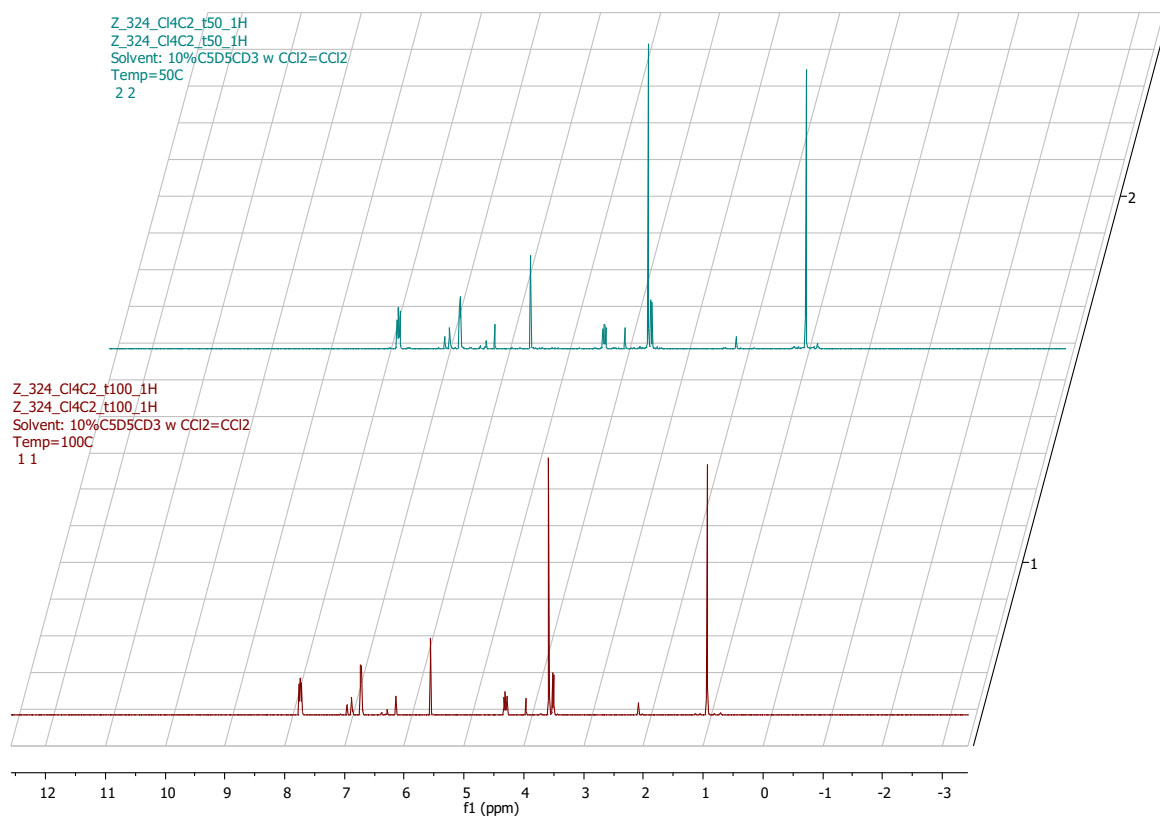

**Figure S24.**  $^1\text{H}$  NMR spectra of **2b** in  $\text{C}_2\text{Cl}_4$  recorded at a)  $50^\circ\text{C}$  and b)  $100^\circ\text{C}$

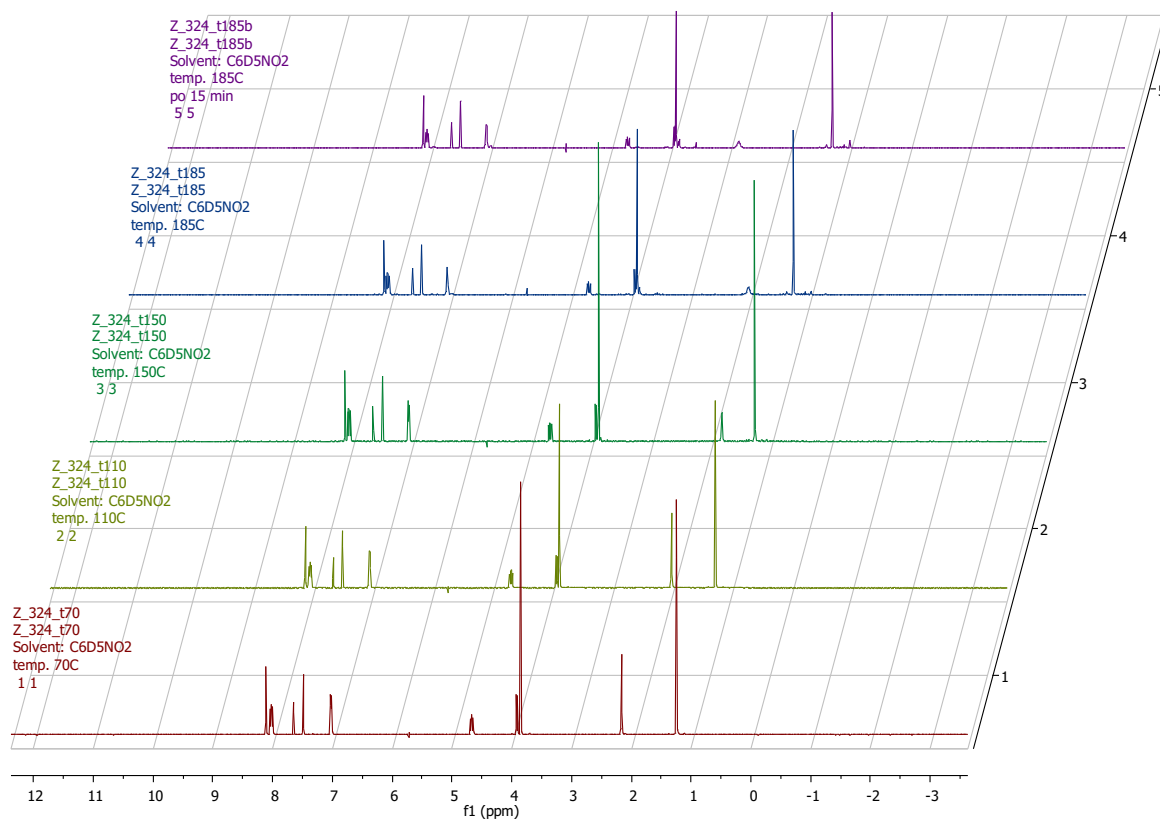

**Figure S25.**  $^1\text{H}$  NMR spectra of **2b** in  $\text{C}_5\text{D}_6\text{NO}_2$  recorded at (a)  $70^\circ\text{C}$ , (b)  $110^\circ\text{C}$ , (c)  $150^\circ\text{C}$ , (d)  $185^\circ\text{C}$  and (e)  $185^\circ\text{C}$  for 15 min

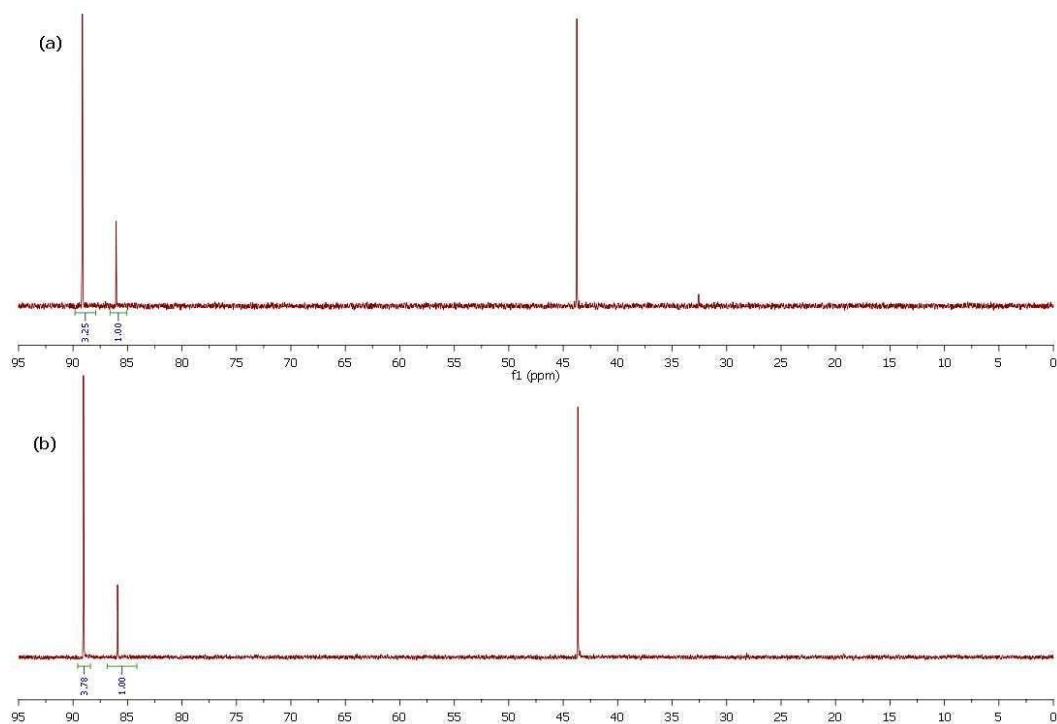

**Figure S26.** 202 MHz  $^{31}\text{P}$  NMR spectra of the crude reaction mixture of disulfane **2a** and  $\text{Ph}_3\text{P}$ : (a) alone (b) after administration of 1 eq of 2,4-dinitrobenzoic acid in  $\text{CH}_2\text{Cl}_2$  plus 10%  $\text{C}_6\text{D}_6$

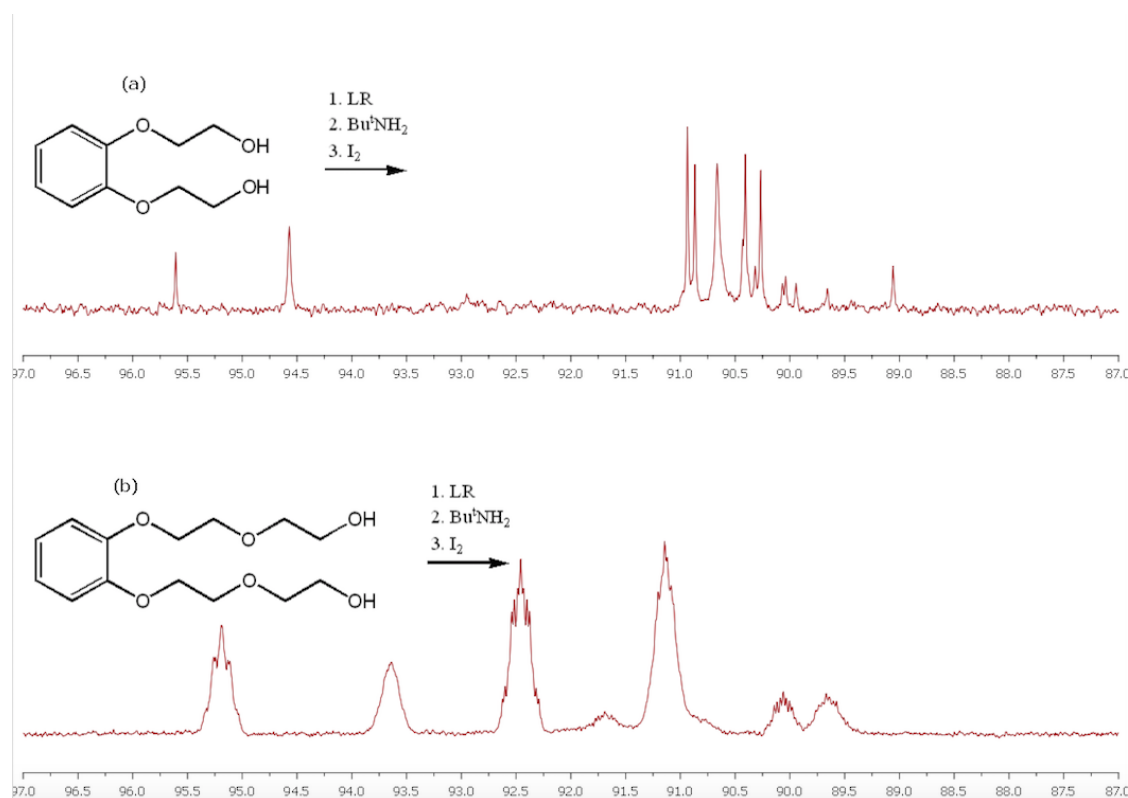

**Figure S27.**  $^{31}\text{P}$  NMR spectra of reaction products obtained using the general procedure (see experimental section), which was intended to give rise to: (a) 14- ( $^1\text{H}$  decoupled spectrum) and (b) 20-membered disulfanes (non-decoupled spectrum)

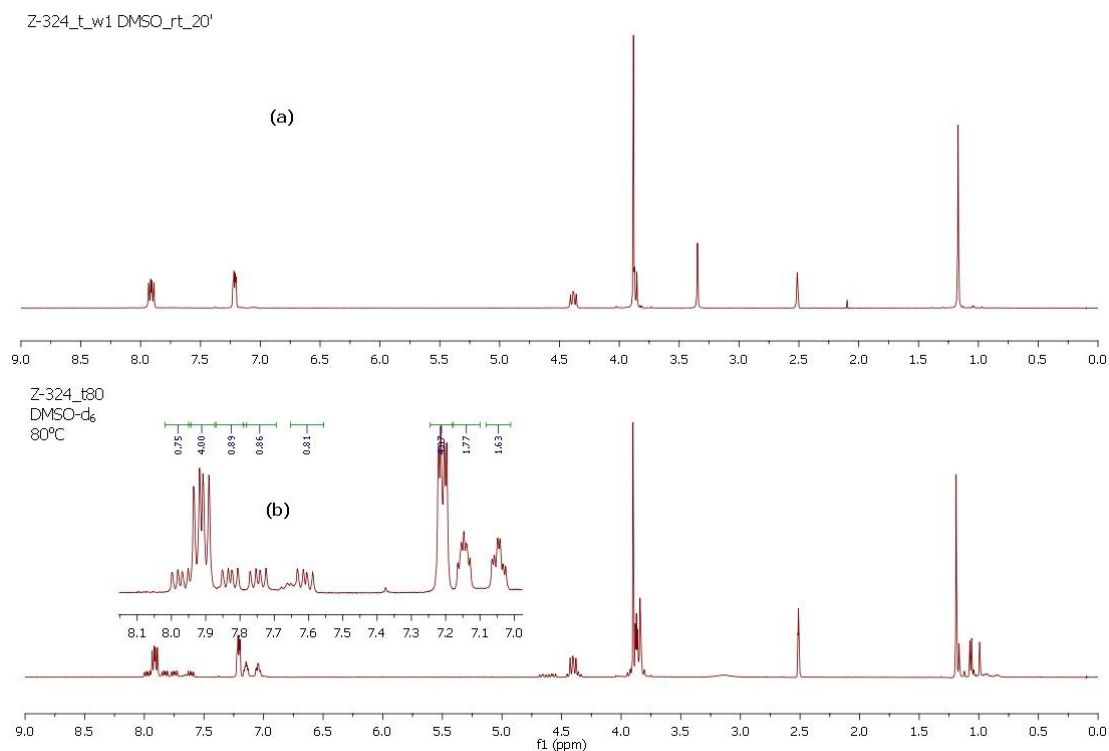

**Figure S28.** 202 MHz  $^{31}\text{P}$  NMR spectra of the solution of disulfane **2b** in  $\text{DMSO-d}_6$  showing the presence of **2b** S-oxides as its initial oxidation products.

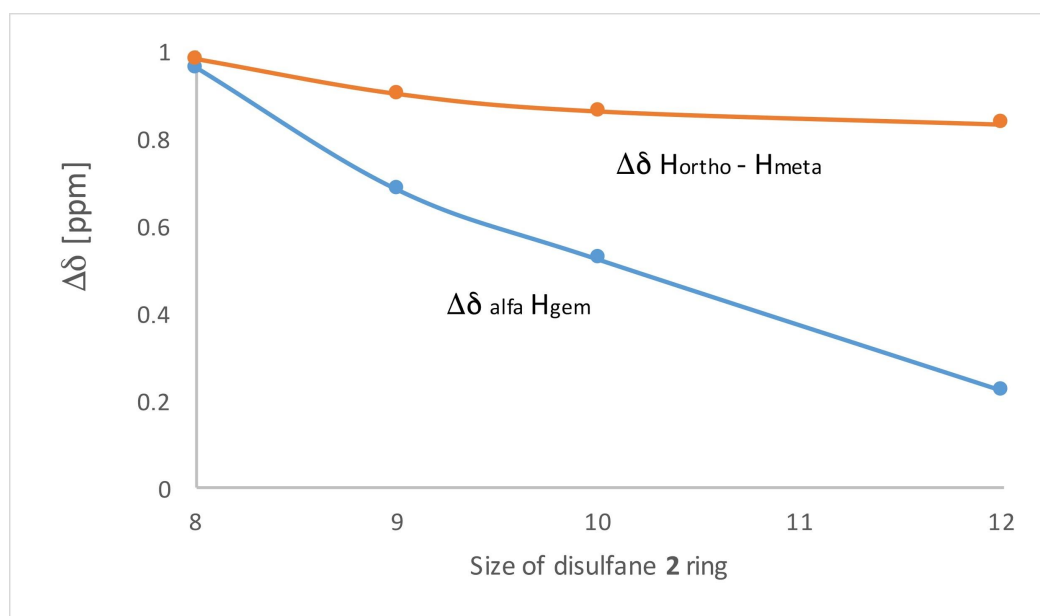

**Figure S29.** Correlations of cyclic disulfanes **2** (except for **2b'**) ring size and the difference in chemical shifts for geminal protons  $\Delta\delta_{\text{Hax-Heq}}$  (blue line) and for aromatic  $\Delta\delta_{\text{Hortho-Hmeta}}$  protons (red line) taken from NMR spectra recorded in  $\text{CDCl}_3$  at room temperature.

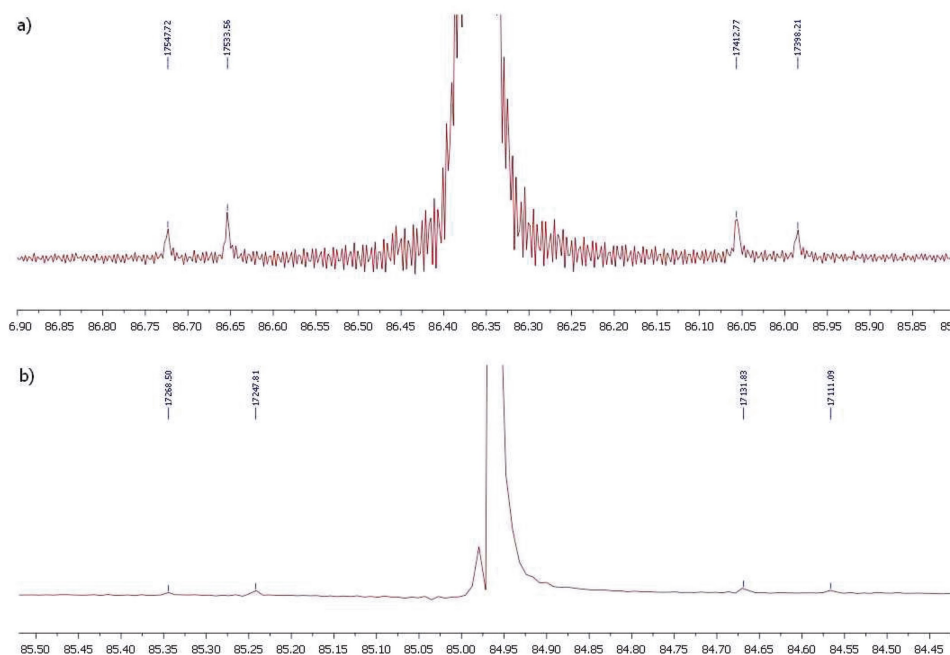

**Figure S30.** 202 MHz  $^{31}\text{P}$  NMR spectra of sulfane **3c** isomers containing  $^{13}\text{C}$  satellites showing a difference in P-P couplings: a) *cis*-**3c** (dd,  $^1J_{\text{PC}} = 135$  Hz,  $^2J_{\text{PP}} = -19.3$  Hz) and b) *trans*-**3c** (dd,  $^1J_{\text{PC}} = 135$  Hz,  $^2J_{\text{PP}} = -12.8$  Hz).

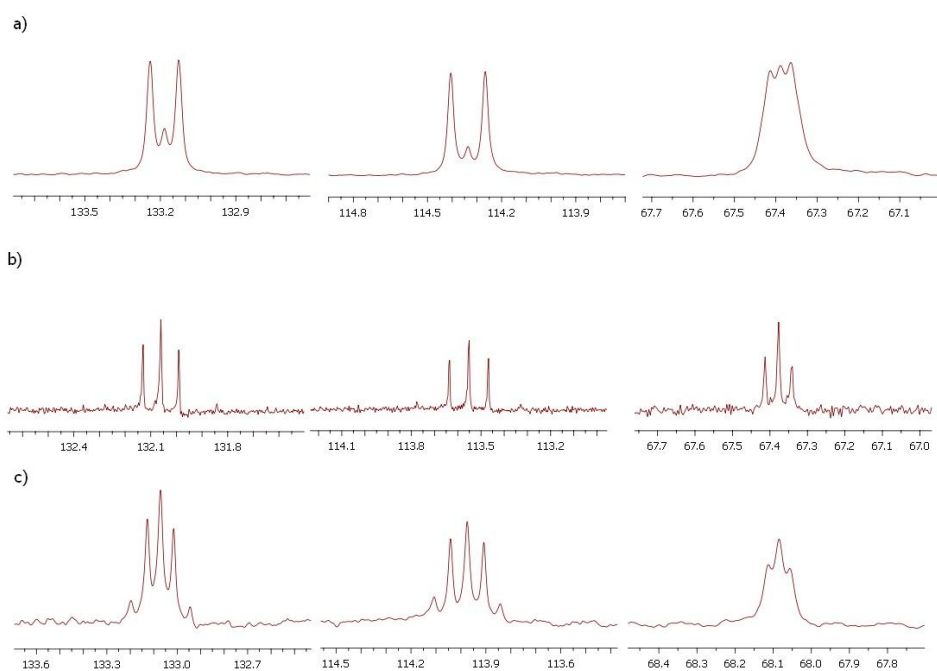

**Figure S31.** AA'X (OCH<sub>2</sub>), C2' and C3' false multiplets observed in  $^{13}\text{C}$  NMR spectra of (a) disulfane **2c** ( $^3J_{\text{PP}} = 4$  Hz), (b) sulfane *cis*-**3c** ( $^2J_{\text{PP}} = -21$  Hz), and sulfane *trans*-**3c** ( $^2J_{\text{PP}} = -14$  Hz) caused by second-order effects of phosphorus atoms magnetic non-equivalence.

**Table S1** Calculated and experimental  $^{31}\text{P}$  NMR parameters for cyclic **2** and **3**

|                 | P1/P2<br>absolute<br>magnetic<br>shielding<br>$\sigma_x$ calcd | $^{31}\text{P}$ Chem<br>shift<br>Calcd*<br>(mean<br>value)<br>$\delta_x = \sigma_{\text{std}} - \sigma_x$ | $^{31}\text{P}$ Chem<br>shift<br>Exp | $^n J_{\text{PP}}$<br>Calcd | $^n J_{\text{PP}}$<br>Exp | $^n J_{\text{exp}}/^n J_{\text{calc}}$ |
|-----------------|----------------------------------------------------------------|-----------------------------------------------------------------------------------------------------------|--------------------------------------|-----------------------------|---------------------------|----------------------------------------|
| <b>2a</b>       | 243.3/243.5                                                    | 98.3                                                                                                      | 88.0                                 | -0.98                       | 4                         | 4.1                                    |
| <b>2b</b>       | 234.9/242.4                                                    | 102.8                                                                                                     | 88.7                                 | -1.33                       | 4                         | 3.0                                    |
| <b>2c</b>       | 237.7/246.5                                                    | 99.4                                                                                                      | 89.2                                 | -1.20                       | 4                         | 3.0                                    |
| <b>2d</b>       | 236.6/237.2                                                    | 104.6                                                                                                     | 90.0                                 | -1.56                       | 4                         | 2.6                                    |
| <i>cis-3a</i>   | 240.1/246.3                                                    | 98.3                                                                                                      | 85.9                                 | -6.1                        | NM                        | NM                                     |
| <i>cis-3b</i>   | 242.0/245.4                                                    | 97.8                                                                                                      | 86.1                                 | -6.1                        | NM                        | NM                                     |
| <i>cis-3c</i>   | 239.3/246.6                                                    | 98.5                                                                                                      | 85.6                                 | -6.3                        | -20.9                     | 3.3                                    |
| <i>trans-3a</i> | 236.4/238.8                                                    | 103.9                                                                                                     | 89.0                                 | -5.3                        | -13.0                     | 2.5                                    |
| <i>trans-3b</i> | 242.9/243.8                                                    | 98.1                                                                                                      | 87.7                                 | -5.0                        | -13.0                     | 2.6                                    |
| <i>trans-3c</i> | 241.6/243.7                                                    | 98.8                                                                                                      | 86.5                                 | -5.0                        | -12.8                     | 2.8                                    |

(\*) Relative to a 85%  $\text{H}_3\text{PO}_4$  standard ( $\sigma_{\text{std}} = 341.5$  ppm)

NM – not measured



# IR and Raman spectra

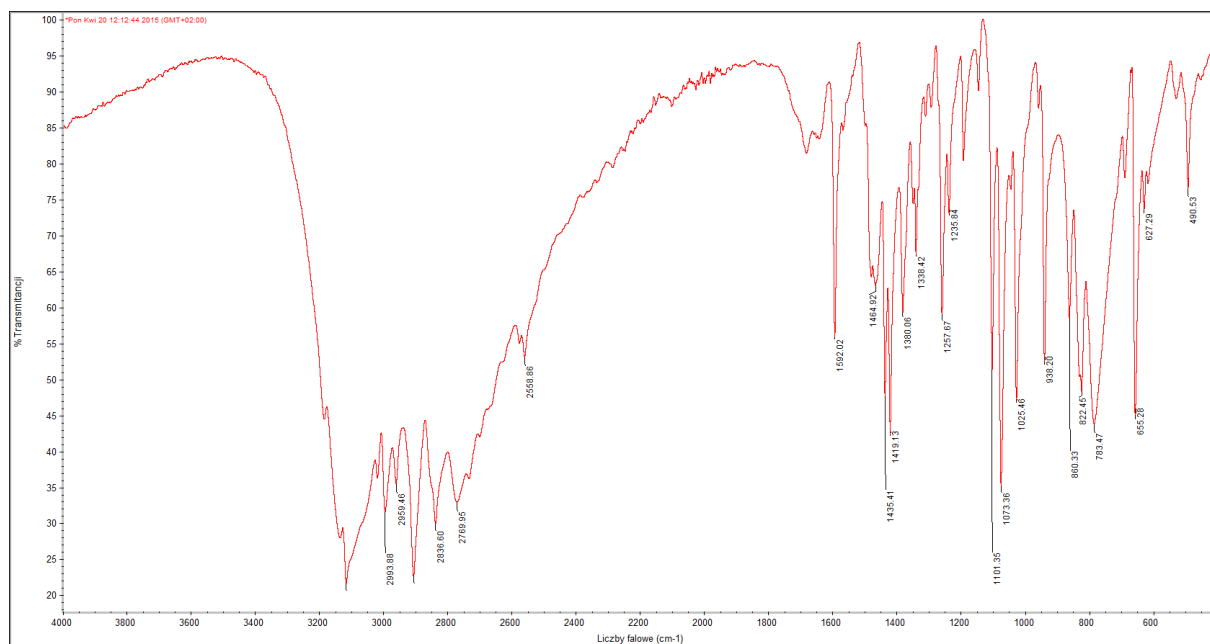

Figure S32. IR spectrum (ATR-IR) of disulfane 2a

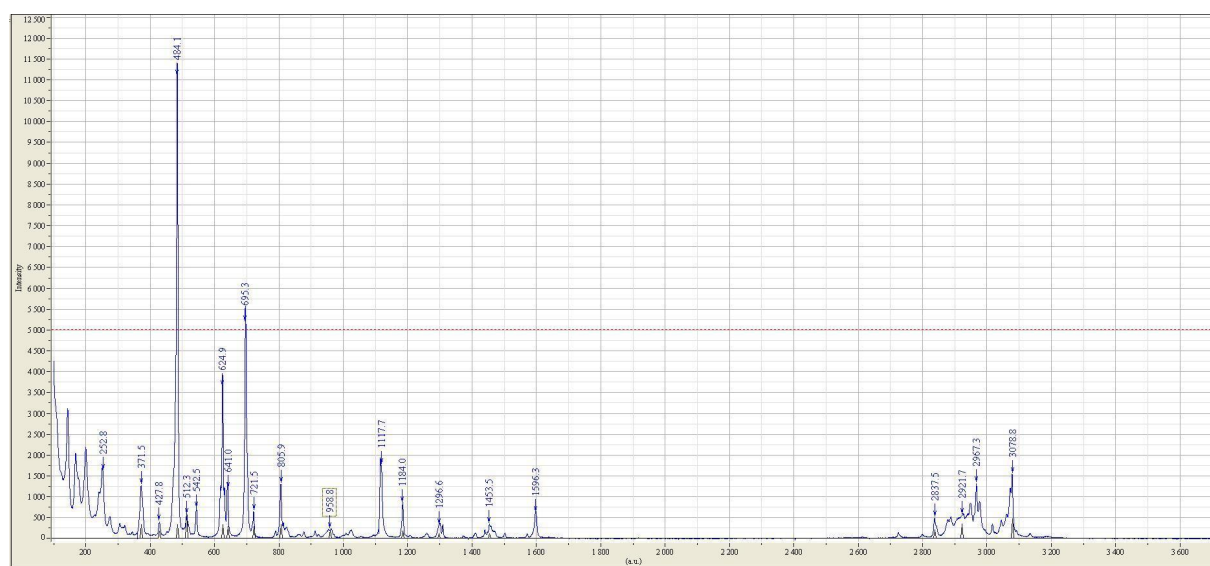

Figure S33. Raman spectrum of disulfane 2a

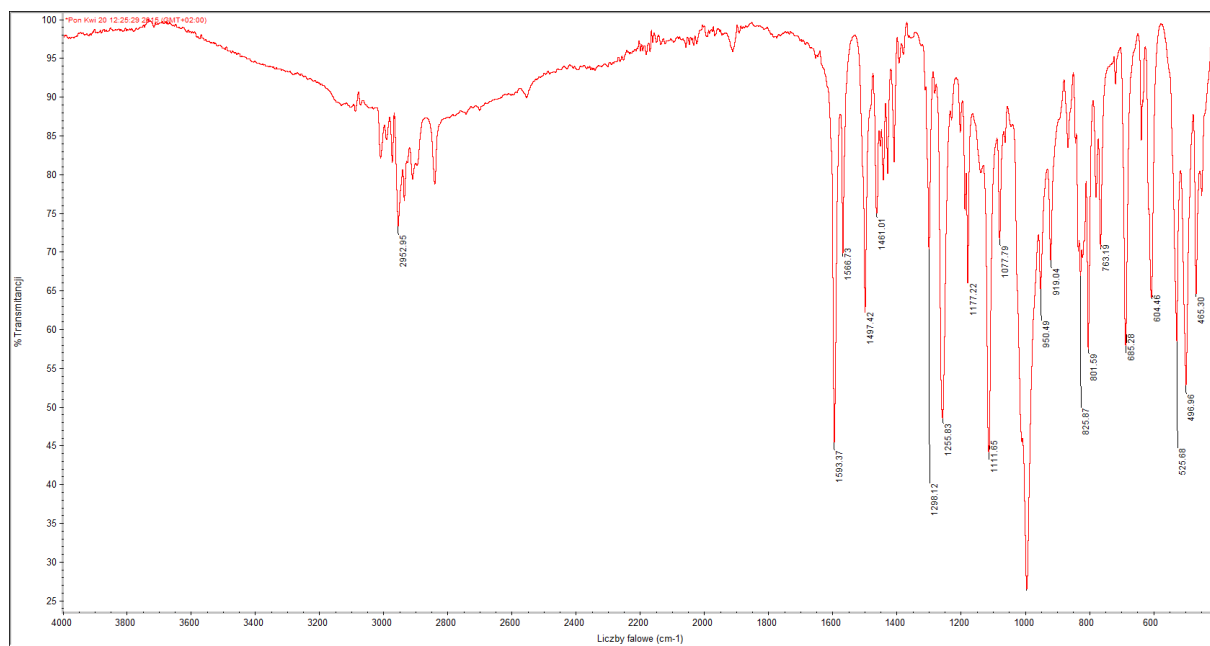

**Figure S34.** IR spectrum (ATR-IR) of disulfane **2b**

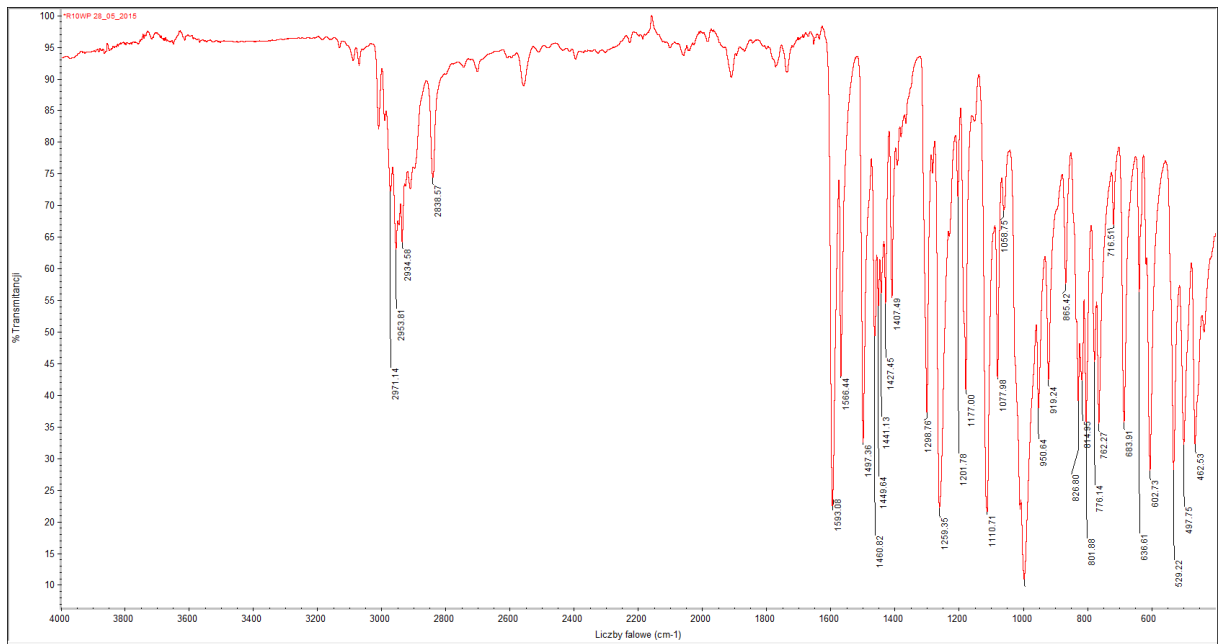

Figure S35. IR spectrum (ATR-IR) of disulfane 2c

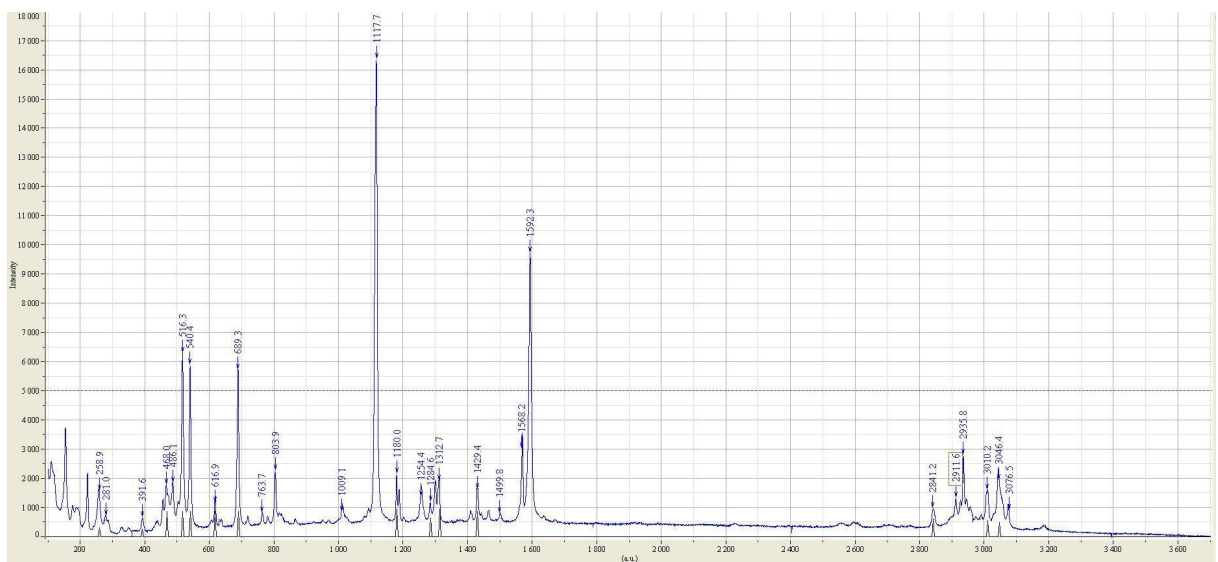

Figure S36. Raman spectrum of disulfane 2c

## X-Ray structural analysis

Crystal structures of cyclic disulfanes **2** and sulfanes **3**

X-ray structures of cyclic disulfanes have been determined for: **2a**, **2b**, **2b'**, **2c** and two polymorphic forms of **2d** – triclinic and monoclinic. Crystallographic data and refinement details are given in **Table S1**. Molecular views of the structures are presented in Figures S37-S-42.

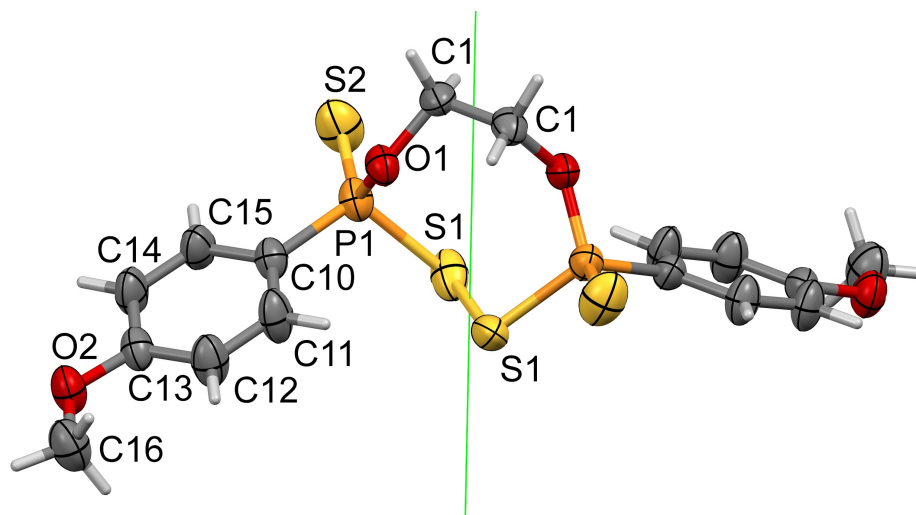

**Figure S37.** View of structure **2a** showing atom labelling scheme. Symmetry axis drawn as the green line, only two labels for symmetry equivalent atoms shown. Displacement ellipsoids drawn at 50% probability level.

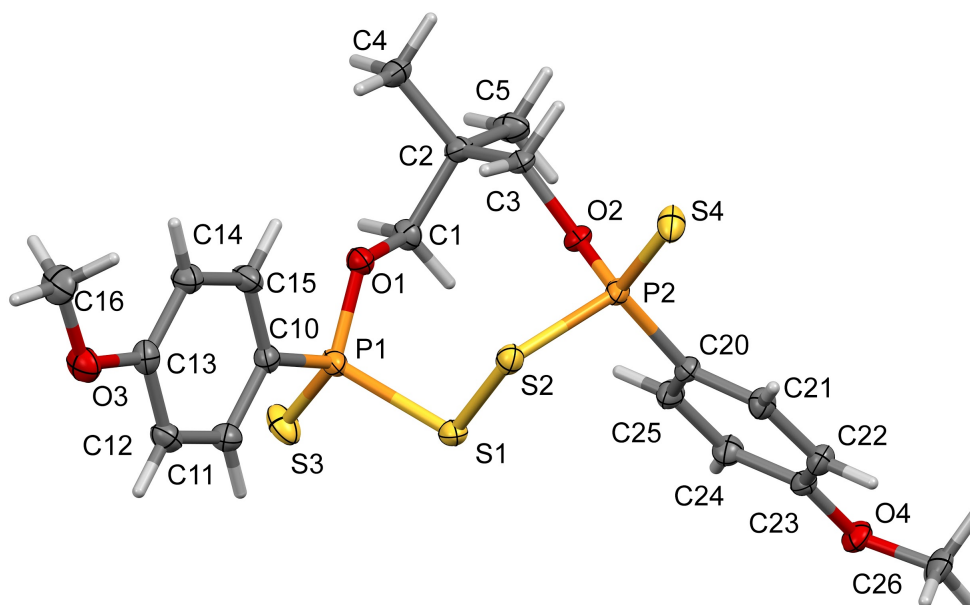

**Figure S38.** View of asymmetric unit of structure **2b** showing atom labelling scheme. Displacement ellipsoids drawn at 50% probability level

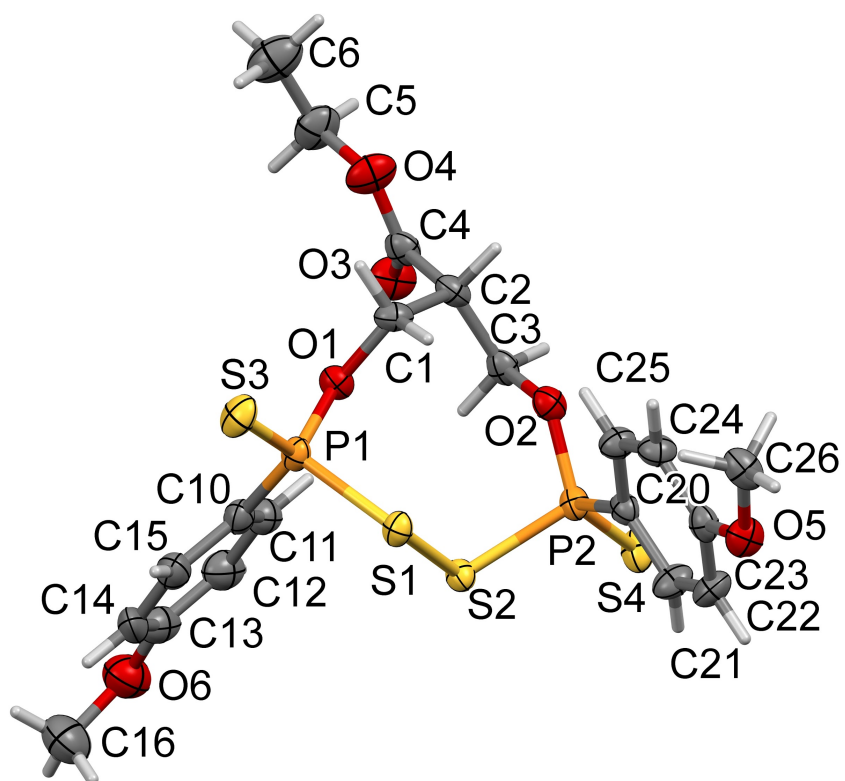

**Figure S39.** View of asymmetric unit of structure **2b'** showing atom labelling scheme. Displacement ellipsoids drawn at 50% probability level.

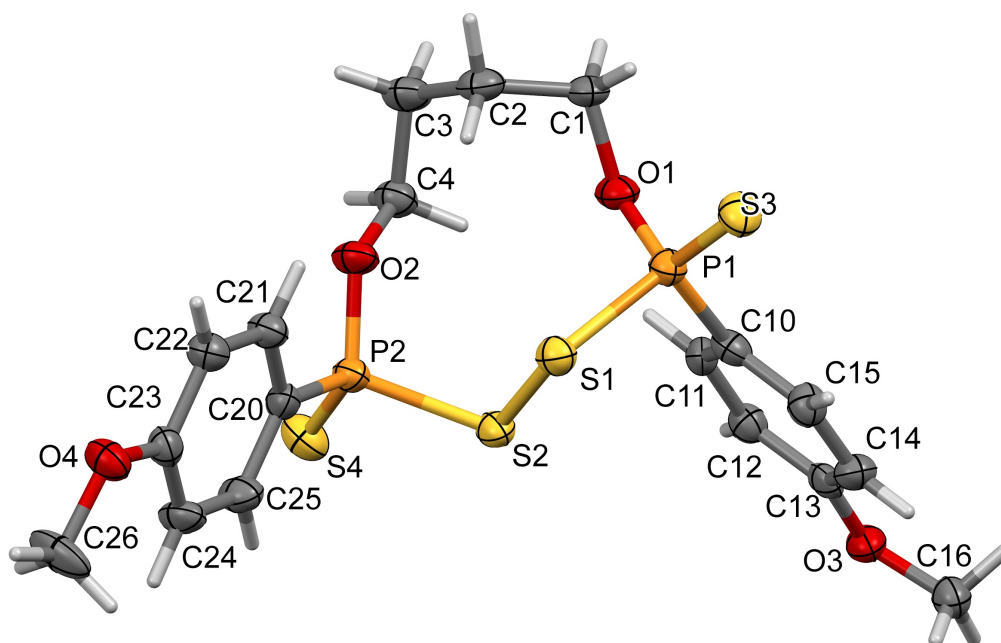

**Figure S40.** View of asymmetric unit of structure **2c** showing atom labelling scheme. Displacement ellipsoids drawn at 50% probability level.

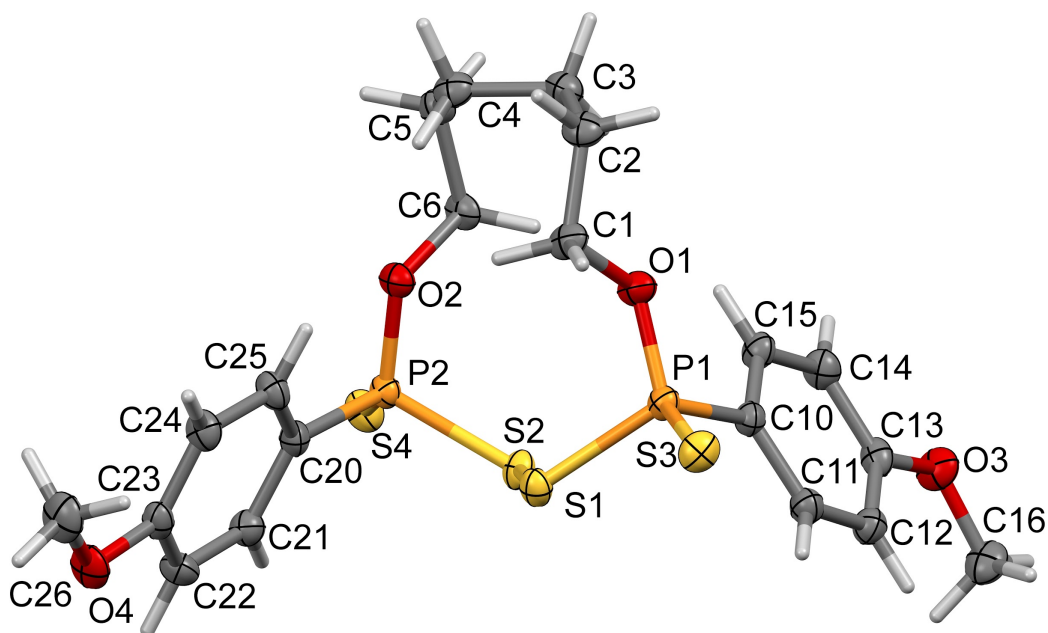

**Figure S41.** View of asymmetric unit of structure **2d\_triclinic** showing atom labelling scheme. Displacement ellipsoids drawn at 50% probability level.

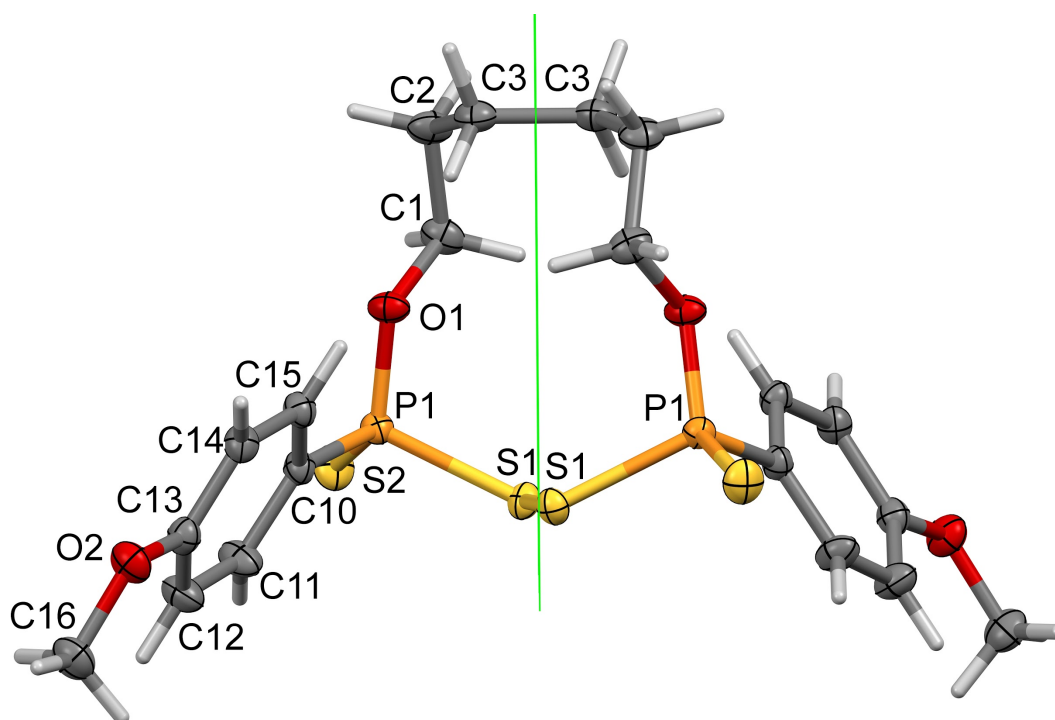

**Figure S42.** View of structure **2d\_monoclinic** showing atom labelling scheme. Symmetry axis drawn as the green line, only three labels for symmetry equivalent atoms shown. Displacement ellipsoids drawn at 50% probability level.

All the compounds exhibit the *trans (anti)* conformation of the anisole residues in relation to the macrocycle and with both P=S groups directed outside the ring. The compounds crystallize in various space groups and with different molecular symmetry, which must be

taken into account during comparison of geometry. Asymmetric unit of **2a** (with the  $-\text{CH}_2-\text{CH}_2-$  organic part of the macrocycle) contains half of the molecule since its symmetry is described by the  $C_2$  point group (Schoenflies) with the two-fold axis passing through the centers of bonds  $\text{S1}-\text{S1}\#1$  and  $\text{C1}-\text{C1}\#1$  ( $\#1$  symmcode:  $1+y, -1+x, -z$ ). Asymmetric units of **2b**, **2b'** and **2d\_triclinic** contain one molecule each. The monoclinic polymorph of **2d** again contains half of the molecule with a two-fold axis passing through bonds  $\text{S1}-\text{S1}\#1$  and  $\text{C3}-\text{C3}\#1$  (where  $\#1$  denotes:  $1-x, y, \frac{1}{2}-z$ ). Molecular symmetry is also described by the  $C_2$  group.

Structures of disulfanes **3** have been also determined by X-Ray structural analyses in this study. Crystallographic data and refinement details for both conformers of **3a**, **3b** and **3d** are given in Table S2. Molecular views of the structures are presented in Figures S43-S48. In three cases i.e. for **3a\_trans**, **3a\_cis**, and **3b\_cis** the asymmetric unit is composed of two molecules.

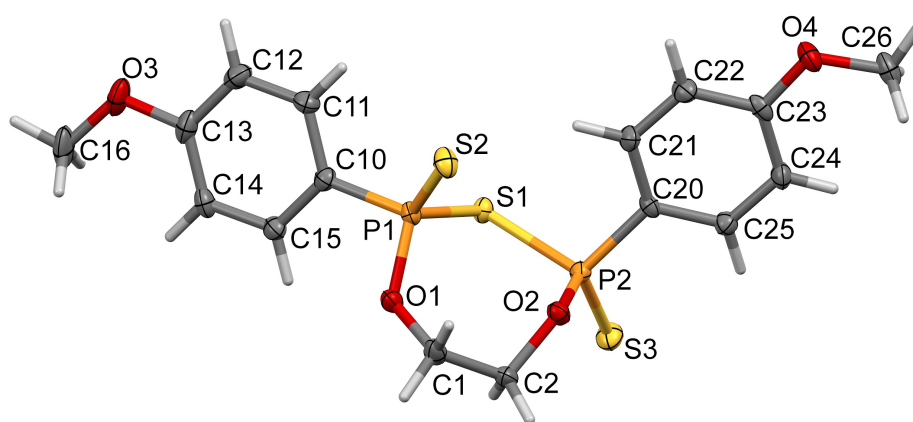

**Figure S43.** View of structure **3a\_trans** showing atom labelling scheme. Only one molecule from the asymmetric unit is shown. Displacement ellipsoids drawn at 50% probability level.

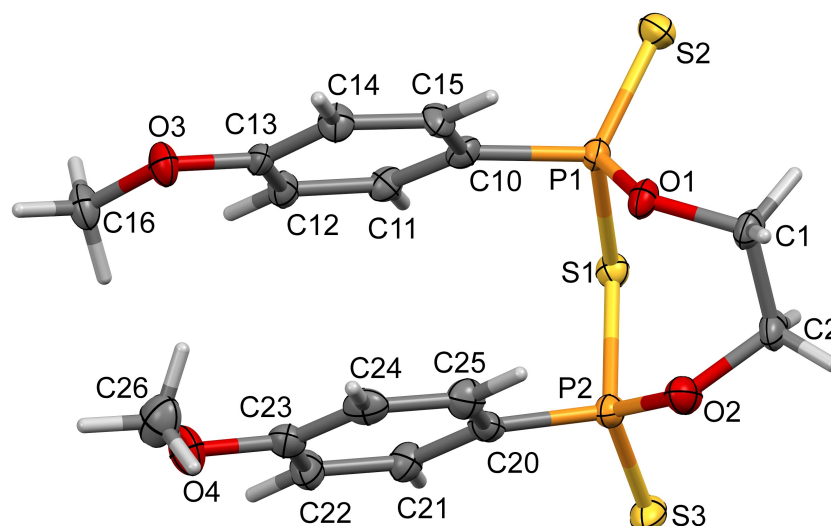

**Figure S44.** View of structure **3a\_cis** showing atom labelling scheme. Only one molecule from the asymmetric unit is shown (out of two). Displacement ellipsoids drawn at 50% probability level.

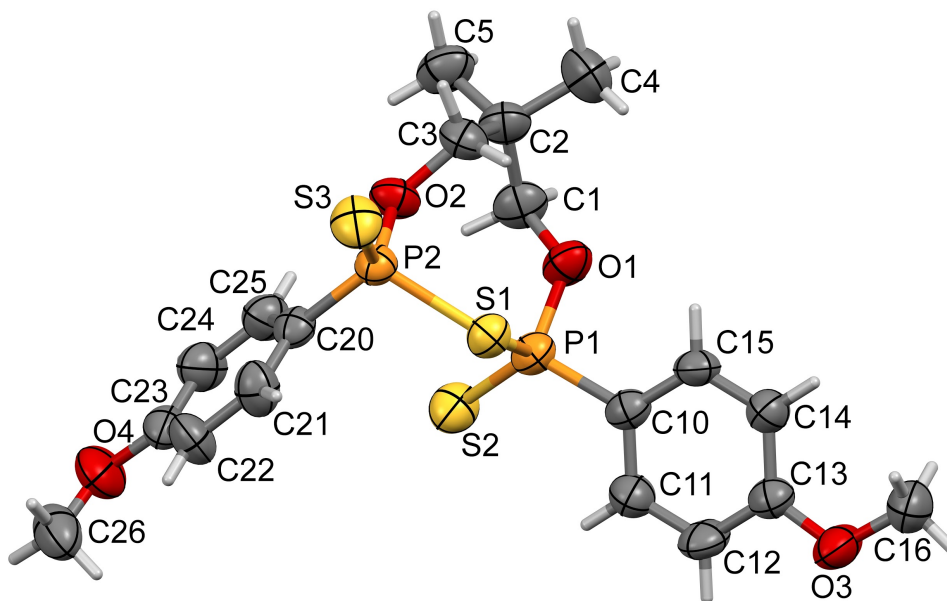

**Figure S45.** View of structure **3b\_trans** showing atom labelling scheme. The asymmetric unit contains one molecule. Displacement ellipsoids drawn at 50% probability level.

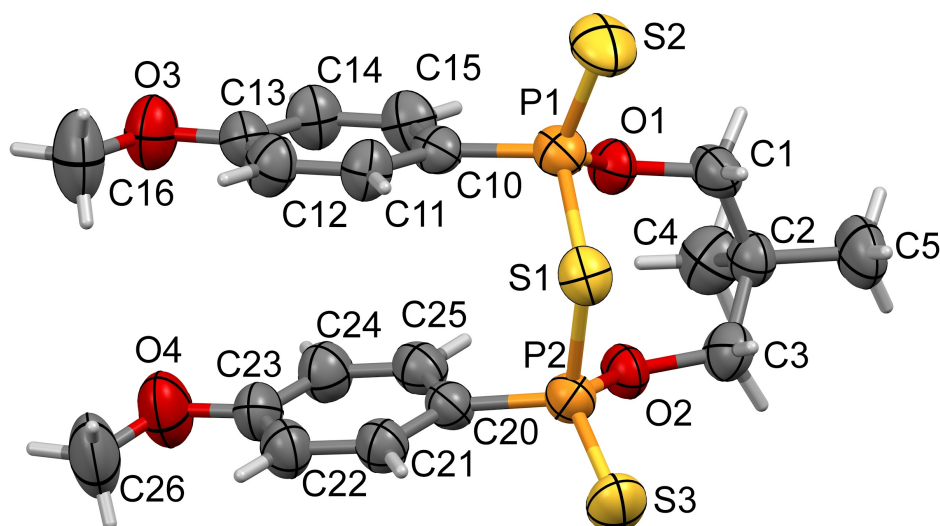

**Figure S46.** View of structure **3b\_cis** showing atom labelling scheme. Only one molecule from the asymmetric unit is shown (out of two,  $Z' = 2$ ). Displacement ellipsoids drawn at 50% probability level.



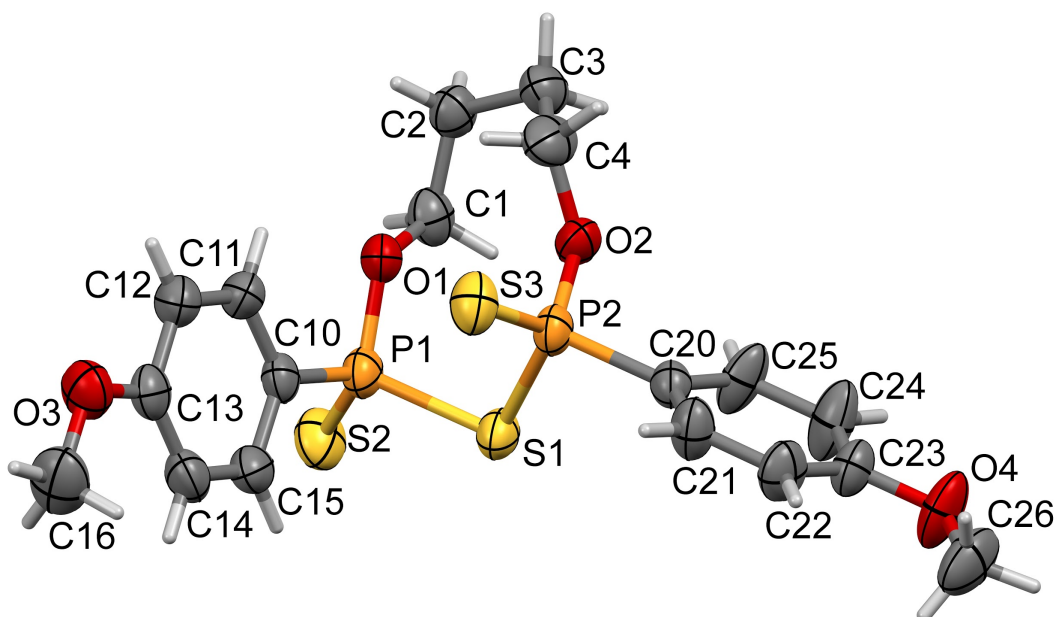

**Figure S47.** View of asymmetric unit of structure **3c\_trans** showing atom labelling scheme. Displacement ellipsoids drawn at 50% probability level.

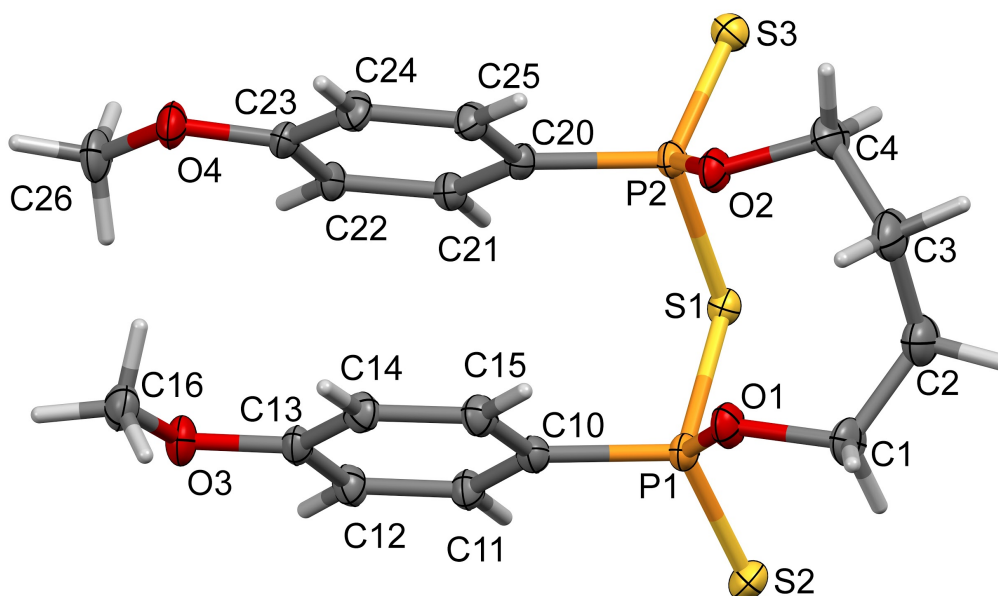

**Figure S48.** View of asymmetric unit of structure **3c\_cis** showing atom labelling scheme. Displacement ellipsoids drawn at 50% probability level.

*Ring conformations.* Having the X-ray data we can analyse conformations of 8-, 9-, and 10- and 12-membered bis(anisylphosphonothioyl) disulfanes, for **2a**, **2b**, **2c** and **2d**, respectively. For definitions of conformations for large macrocycles see: ring puckering analysis [e.g. D. Cremer & J.A. Pople, *J.Amer.Chem.Soc.*, 97, (1975), 1354-1358, D. Cremer, *Acta Cryst.* (1984), B40, 498-500, G.G. Evans & J.A. Boeyens, *Acta Cryst.* (1989), B45, 581-590].

A large interring P-S-S-P torsion angle, increasing with the ring size from *ca* 94° to *ca* 125°, is the most characteristic structural feature of cyclic disulfanes **2**.

*Bonds and angles comparative study.*

Related geometric parameters for all disulfanes **2** are gathered in Table S4.

## Tables

**Table S2.** Details of the X-ray data collections and refinements for cyclic disulfanes **2a-d\***

|                                                                                                                              | <b>2a</b>                                                                    | <b>2b</b>                                                                    | <b>2b'</b>                                                                   | <b>2c</b>                                                                    | <b>2d_triclinic</b>                                                          | <b>2d_monoclinic</b>                                                         |
|------------------------------------------------------------------------------------------------------------------------------|------------------------------------------------------------------------------|------------------------------------------------------------------------------|------------------------------------------------------------------------------|------------------------------------------------------------------------------|------------------------------------------------------------------------------|------------------------------------------------------------------------------|
| <b>Crystal data</b>                                                                                                          |                                                                              |                                                                              |                                                                              |                                                                              |                                                                              |                                                                              |
| Chemical formula                                                                                                             | C <sub>16</sub> H <sub>18</sub> O <sub>4</sub> P <sub>2</sub> S <sub>4</sub> | C <sub>19</sub> H <sub>24</sub> O <sub>4</sub> P <sub>2</sub> S <sub>4</sub> | C <sub>20</sub> H <sub>24</sub> O <sub>6</sub> P <sub>2</sub> S <sub>4</sub> | C <sub>18</sub> H <sub>22</sub> O <sub>4</sub> P <sub>2</sub> S <sub>4</sub> | C <sub>20</sub> H <sub>26</sub> O <sub>4</sub> P <sub>2</sub> S <sub>4</sub> | C <sub>20</sub> H <sub>26</sub> O <sub>4</sub> P <sub>2</sub> S <sub>4</sub> |
| <i>M<sub>r</sub></i>                                                                                                         | 464.48                                                                       | 506.56                                                                       | 550.57                                                                       | 492.53                                                                       | 520.59                                                                       | 520.59                                                                       |
| Crystal system, space group                                                                                                  | Tetragonal, <i>P</i> 4 <sub>3</sub> 2 <sub>1</sub> 2                         | Monoclinic, <i>P</i> 2 <sub>1</sub> / <i>c</i>                               | Triclinic, <i>P</i> -1                                                       | Monoclinic, <i>P</i> 2 <sub>1</sub> / <i>c</i>                               | Triclinic, <i>P</i> -1                                                       | Monoclinic, <i>C</i> 2/ <i>c</i>                                             |
| Temperature (K)                                                                                                              | 296                                                                          | 130                                                                          | 120                                                                          | 120                                                                          | 120                                                                          | 120                                                                          |
| <i>a</i> , <i>b</i> , <i>c</i> (Å)                                                                                           | 7.2415 (3),<br>7.2415 (3),<br>39.516 (2)                                     | 12.3171 (12),<br>9.1385 (5),<br>21.439 (2)                                   | 6.8942 (8),<br>9.3182 (11),<br>19.921 (3)                                    | 9.4262 (6),<br>13.3761 (8),<br>17.7998 (13)                                  | 10.4186 (13),<br>10.5778 (11),<br>12.5703 (15)                               | 12.6554 (19),<br>8.5028 (9),<br>23.058 (4)                                   |
| <i>α</i> , <i>β</i> , <i>γ</i> (°)                                                                                           | 90, 90, 90                                                                   | 90, 96.512 (8),<br>90                                                        | 95.844 (10),<br>90.407 (10),<br>93.486 (10)                                  | 90, 90.068 (7),<br>90                                                        | 71.900 (9),<br>67.807 (9),<br>82.881 (9)                                     | 90, 101.230 (12),<br>90                                                      |
| <i>V</i> (Å <sup>3</sup> )                                                                                                   | 2072.2 (2)                                                                   | 2397.6 (4)                                                                   | 1270.6 (3)                                                                   | 2244.3 (3)                                                                   | 1219.2 (3)                                                                   | 2433.7 (6)                                                                   |
| <i>Z</i>                                                                                                                     | 4                                                                            | 4                                                                            | 2                                                                            | 4                                                                            | 2                                                                            | 4                                                                            |
| Radiation type                                                                                                               | Mo <i>Kα</i>                                                                 |
| <i>μ</i> (mm <sup>-1</sup> )                                                                                                 | 0.63                                                                         | 0.55                                                                         | 0.53                                                                         | 0.59                                                                         | 0.55                                                                         | 0.55                                                                         |
| Crystal size (mm)                                                                                                            | 0.44 × 0.42 ×<br>0.03                                                        | 0.34 × 0.03 ×<br>0.02                                                        | 0.35 × 0.29 ×<br>0.17                                                        | 0.21 × 0.20 ×<br>0.14                                                        | 0.31 × 0.15 ×<br>0.05                                                        | 0.34 × 0.15 × 0.11                                                           |
| <b>Data collection</b>                                                                                                       |                                                                              |                                                                              |                                                                              |                                                                              |                                                                              |                                                                              |
| Diffractometer                                                                                                               | KM4CCD,<br>Sapphire2                                                         | STOE <i>IPDS</i> 2T<br>diffractometer                                        | KM4CCD,<br>Sapphire2                                                         | KM4CCD,<br>Sapphire2                                                         | STOE <i>IPDS</i> 2T<br>diffractometer                                        | STOE <i>IPDS</i> 2T<br>diffractometer                                        |
| Absorption correction                                                                                                        | Multi-scan                                                                   | None                                                                         | Multi-scan                                                                   | Analytical                                                                   | None                                                                         | None                                                                         |
| <i>T<sub>min</sub></i> , <i>T<sub>max</sub></i>                                                                              | 0.689, 0.98                                                                  | –                                                                            | 0.891, 1                                                                     | 0.893, 0.929                                                                 | –                                                                            | –                                                                            |
| No. Of measured, independent and observed [ <i>I</i> > 2σ( <i>I</i> )] reflections                                           | 14211, 2019,<br>1839                                                         | 9945, 4378,<br>4046                                                          | 7730, 4687,<br>3746                                                          | 9496, 4047,<br>3309                                                          | 9505, 5339,<br>4702                                                          | 8581, 3264, 2762                                                             |
| <i>R<sub>int</sub></i>                                                                                                       | 0.036                                                                        | 0.017                                                                        | 0.028                                                                        | 0.051                                                                        | 0.109                                                                        | 0.027                                                                        |
| (sin θ/λ) <sub>max</sub> (Å <sup>-1</sup> )                                                                                  | 0.617                                                                        | 0.608                                                                        | 0.604                                                                        | 0.606                                                                        | 0.647                                                                        | 0.686                                                                        |
| <b>Refinement</b>                                                                                                            |                                                                              |                                                                              |                                                                              |                                                                              |                                                                              |                                                                              |
| <i>R</i> [ <i>F</i> <sup>2</sup> > 2σ( <i>F</i> <sup>2</sup> )], <i>wR</i> ( <i>F</i> <sup>2</sup> ), <i>Goodness of fit</i> | 0.038, 0.092,<br>1.09                                                        | 0.025, 0.068,<br>1.07                                                        | 0.054, 0.147,<br>1.05                                                        | 0.082, 0.241,<br>1.05                                                        | 0.068, 0.193,<br>1.07                                                        | 0.027, 0.074,<br>1.05                                                        |
| No. Of reflections                                                                                                           | 2019                                                                         | 4378                                                                         | 4687                                                                         | 4047                                                                         | 5339                                                                         | 3264                                                                         |
| No. Of parameters                                                                                                            | 120                                                                          | 266                                                                          | 289                                                                          | 256                                                                          | 273                                                                          | 137                                                                          |
| H-atom treatment                                                                                                             | parameters constrained                                                       |
| Δ <sub>max</sub> , Δ <sub>min</sub> (e Å <sup>-3</sup> )                                                                     | 0.33, -0.22                                                                  | 0.35, -0.22                                                                  | 1.37, -0.34                                                                  | 2.27, -0.84                                                                  | 0.82, -0.84                                                                  | 0.36, -0.27                                                                  |
| Absolute structure                                                                                                           | Refined as an inversion twin.                                                | –                                                                            | –                                                                            | –                                                                            | –                                                                            | –                                                                            |
| Abs. str. parameter                                                                                                          | 0.45 (17)                                                                    | –                                                                            | –                                                                            | –                                                                            | –                                                                            | –                                                                            |
| CCDC number                                                                                                                  | <b>719124</b>                                                                | <b>1560159</b>                                                               | <b>719125</b>                                                                | <b>1558043</b>                                                               | <b>1558050</b>                                                               | <b>1558049</b>                                                               |

\* structures of **2a** and **2c** were already published (W. Przychodzeń, J. Chojnacki, *Acta Cryst.*, 2018, **E74**, 212–216)

**Table S3.** Details of the X-ray data collections and refinements for cyclic sulfanes **3**

|                                                                            | <b>3a_trans</b>                                                              | <b>3a_cis</b>                                                                | <b>3b_trans</b>                                                              | <b>3b_cis</b>                                                                | <b>3c_trans</b>                                                              | <b>3c_cis</b>                                                                |
|----------------------------------------------------------------------------|------------------------------------------------------------------------------|------------------------------------------------------------------------------|------------------------------------------------------------------------------|------------------------------------------------------------------------------|------------------------------------------------------------------------------|------------------------------------------------------------------------------|
| Crystal data                                                               |                                                                              |                                                                              |                                                                              |                                                                              |                                                                              |                                                                              |
| Chemical formula                                                           | C <sub>16</sub> H <sub>18</sub> O <sub>4</sub> P <sub>2</sub> S <sub>3</sub> | C <sub>16</sub> H <sub>18</sub> O <sub>4</sub> P <sub>2</sub> S <sub>3</sub> | C <sub>19</sub> H <sub>24</sub> O <sub>4</sub> P <sub>2</sub> S <sub>3</sub> | C <sub>19</sub> H <sub>24</sub> O <sub>4</sub> P <sub>2</sub> S <sub>3</sub> | C <sub>18</sub> H <sub>22</sub> O <sub>4</sub> P <sub>2</sub> S <sub>3</sub> | C <sub>18</sub> H <sub>22</sub> O <sub>4</sub> P <sub>2</sub> S <sub>3</sub> |
| $M_r$                                                                      | 432.42                                                                       | 432.42                                                                       | 474.5                                                                        | 474.5                                                                        | 460.47                                                                       | 460.47                                                                       |
| Crystal system, space group                                                | Monoclinic, $P2_1/c$                                                         | Orthorhombic, $Pna2_1$                                                       | Monoclinic, $Pc$                                                             | Monoclinic, $P2_1/n$                                                         | Triclinic, $P-1$                                                             | Triclinic, $P-1$                                                             |
| Temperature (K)                                                            | 130                                                                          | 150                                                                          | 293                                                                          | 293                                                                          | 293                                                                          | 120                                                                          |
| $a, b, c$ (Å)                                                              | 7.2217 (5),<br>15.7169 (6),<br>33.5977 (17)                                  | 20.284 (6),<br>21.511 (6),<br>8.717 (4)                                      | 14.6528 (5),<br>9.1347 (3),<br>17.8598 (6)                                   | 11.2880 (18),<br>18.3863 (13),<br>12.2511 (11)                               | 8.5551 (6),<br>10.9717 (8),<br>13.0957 (10)                                  | 8.7882 (11),<br>8.8878 (10),<br>14.120 (2)                                   |
| $\alpha, \beta, \gamma$ (°)                                                | 90, 92.598 (5), 90                                                           | 90, 90, 90                                                                   | 90, 108.073 (4), 90                                                          | 90, 112.627 (13), 90                                                         | 113.352 (7),<br>104.434 (7),<br>93.127 (6)                                   | 73.295 (11),<br>75.044 (11),<br>81.888 (9)                                   |
| $V$ (Å <sup>3</sup> )                                                      | 3809.5 (4)                                                                   | 3803 (2)                                                                     | 2272.57 (14)                                                                 | 2346.9 (5)                                                                   | 1076.52 (15)                                                                 | 1017.8 (2)                                                                   |
| $Z$                                                                        | 8                                                                            | 8                                                                            | 4                                                                            | 4                                                                            | 2                                                                            | 2                                                                            |
| Radiation type                                                             | Mo $K\alpha$                                                                 |
| $\mu$ (mm <sup>-1</sup> )                                                  | 0.58                                                                         | 0.58                                                                         | 0.49                                                                         | 0.47                                                                         | 0.51                                                                         | 0.54                                                                         |
| Crystal size (mm)                                                          | 0.29 × 0.05 × 0.02                                                           | 0.21 × 0.08 × 0.07                                                           | 0.29 × 0.17 × 0.11                                                           | 0.13 × 0.04 × 0.02                                                           | 0.41 × 0.26 × 0.02                                                           | 0.44 × 0.23 × 0.11                                                           |
| <b>Data collection</b>                                                     |                                                                              |                                                                              |                                                                              |                                                                              |                                                                              |                                                                              |
| Diffractometer                                                             | STOE <i>IPDS</i> 2T diffractometer                                           | STOE <i>IPDS</i> 2T diffractometer                                           | KM4CCD, Sapphire2                                                            | KM4CCD, Sapphire2                                                            | KM4CCD, Sapphire2                                                            | STOE <i>IPDS</i> 2T diffractometer                                           |
| Absorption correction                                                      | Integration                                                                  | None                                                                         | Multi-scan                                                                   | Multi-scan                                                                   | Multi-scan                                                                   | Integration                                                                  |
| $T_{\min}, T_{\max}$                                                       | 0.834, 0.973                                                                 | -                                                                            | 0.852, 1                                                                     | 0.889, 1                                                                     | 0.551, 1                                                                     | 0.971, 0.992                                                                 |
| No. of measured, independent and observed [ $I > 2\sigma(I)$ ] reflections | 15794, 7366, 5071                                                            | 17031, 8098, 6283                                                            | 15538, 7935, 6588                                                            | 11898, 4297, 2318                                                            | 6586, 3990, 2275                                                             | 14738, 5492, 3596                                                            |
| $R_{\text{int}}$                                                           | 0.057                                                                        | 0.052                                                                        | 0.036                                                                        | 0.061                                                                        | 0.092                                                                        | 0.064                                                                        |
| $(\sin \theta/\lambda)_{\text{max}}$ (Å <sup>-1</sup> )                    | 0.617                                                                        | 0.650                                                                        | 0.617                                                                        | 0.606                                                                        | 0.606                                                                        | 0.688                                                                        |
| <b>Refinement</b>                                                          |                                                                              |                                                                              |                                                                              |                                                                              |                                                                              |                                                                              |
| $R[F^2 > 2\sigma(F^2)], wR(F^2), \text{GooF}$                              | 0.053, 0.127, 1.02                                                           | 0.054, 0.129, 1.05                                                           | 0.052, 0.133, 1.05                                                           | 0.061, 0.173, 1.07                                                           | 0.064, 0.18, 1.03                                                            | 0.061, 0.173, 0.94                                                           |
| No. of reflections                                                         | 7366                                                                         | 8098                                                                         | 7935                                                                         | 4297                                                                         | 3990                                                                         | 5492                                                                         |
| No. of parameters                                                          | 455                                                                          | 456                                                                          | 506                                                                          | 253                                                                          | 244                                                                          | 246                                                                          |
| No. of restraints                                                          | 0                                                                            | 1                                                                            | 2                                                                            | 0                                                                            | 0                                                                            | 0                                                                            |
| H-atom treatment                                                           | parameters constrained                                                       |
| $\Delta \rho_{\text{max}}, \Delta \rho_{\text{min}}$ (e Å <sup>-3</sup> )  | 0.62, -0.43                                                                  | 0.74, -0.36                                                                  | 0.55, -0.38                                                                  | 0.32, -0.45                                                                  | 0.51, -0.58                                                                  | 1.49, -0.66                                                                  |

|                              |                |                               |                               |               |                |                |
|------------------------------|----------------|-------------------------------|-------------------------------|---------------|----------------|----------------|
| Absolute structure           | –              | Refined as an inversion twin. | Refined as an inversion twin. | –             | –              | –              |
| Absolute structure parameter | –              | 0.11 (13)                     | 0.05 (12)                     | –             | –              | –              |
| CCDC number                  | <b>1558051</b> | <b>1561560</b>                | <b>944069</b>                 | <b>944068</b> | <b>1558052</b> | <b>1558054</b> |

**Table S4.** Geometric parameters for cyclic disulfanes **2** and a reference, acyclic structure\*

|                              | <b>2a</b>     | <b>2b</b>  | <b>2b'</b> | <b>2c</b> | <b>2d tri</b> | <b>2d mono</b> | ref [Wollins]             |
|------------------------------|---------------|------------|------------|-----------|---------------|----------------|---------------------------|
| independent molecules, $Z'$  | $\frac{1}{2}$ | 1          | 1          | 1         | 1             | $\frac{1}{2}$  | 2                         |
| <b>Bond lengths, Å</b>       |               |            |            |           |               |                |                           |
| P1—S1                        | 2.101(1)      | 2.1083(6)  | 2.118(1)   | 2.117(2)  | 2.111(1)      | 2.1088(7)      | 2.1153(6) and 2.1023(7)   |
| P1=S3 (or P1=S2 *)           | 1.922(2)      | 1.9276(6)  | 1.936(1)   | 1.931(3)  | 1.9305(9)     | 1.9299(6)      | 1.9303(7) and 1.9305(8)   |
| P2—S2                        | -             | 2.1085(6)  | 2.106(1)   | 2.090(3)  | 2.1043(9)     | -              | 2.1090(7) and 2.1037(6)   |
| P2=S4                        | -             | 1.9248(6)  | 1.946(1)   | 1.933(3)  | 1.9313(9)     | -              | 1.9344(6) and 1.9295(7)   |
| S1—S2 (S1—S1#1**)            | 2.068(2)      | 2.0704(6)  | 2.081(1)   | 2.074(3)  | 2.0705(9)     | 2.0759(5)      | 2.0850(8) and 2.0831(7)   |
| P1—O1                        | 1.584(2)      | 1.580(1)   | 1.602(2)   | 1.580(5)  | 1.586(2)      | 1.580(1)       | 1.583(1) and 1.582(1)     |
| P2—O2                        | -             | 1.589(1)   | 1.602(2)   | 1.582(5)  | 1.590(2)      | -              | 1.583(1) and 1.585(1)     |
| P1—C10                       | 1.787(3)      | 1.780(2)   | 1.794(4)   | 1.797(7)  | 1.780(2)      | 1.779(1)       | 1.780(2) and 1.779(2)     |
| P2—C20                       | -             | 1.780(1)   | 1.795(3)   | 1.794(7)  | 1.780(3)      | -              | 1.785(2) and 1.784(2)     |
| <b>valence angles, °</b>     |               |            |            |           |               |                |                           |
| S1—P1=S3 (S1—P1=S2 *)        | 104.43(6)     | 104.82(2)  | 102.41(5)  | 104.2(1)  | 103.16(4)     | 103.16(2)      | 103.17(3) and 103.78(3)   |
| S2—P2=S4                     | -             | 104.84(2)  | 104.01(5)  | 103.0(1)  | 101.39(4)     | -              | 104.50(3) and 102.64(3)   |
| S1—P1—O1                     | 106.96(9)     | 107.32(4)  | 107.75(9)  | 108.6(2)  | 108.65(8)     | 109.11(4)      | 105.66(5) and 106.62(5)   |
| S2—P2—O2                     | -             | 106.89(4)  | 108.32(9)  | 108.2(2)  | 109.73(8)     | -              | 107.34(5) and 105.87(5)   |
| S1—P1—C10                    | 109.6(1)      | 109.08(5)  | 108.2(1)   | 105.2(2)  | 107.11(9)     | 107.52(4)      | 110.47(6) and 108.96(6)   |
| S2—P2—C20                    | -             | 109.95(5)  | 109.1(1)   | 109.4(2)  | 108.27(9)     | -              | 109.55(6) and 111.20(6)   |
| S3=P1—C10 (S2=P1—C10 *)      | 116.2(1)      | 115.95(5)  | 120.0(1)   | 118.5(2)  | 118.55(9)     | 118.84(5)      | 116.75(6) and 117.84(7)   |
| S4=P2—C20                    | -             | 116.88(5)  | 117.1(1)   | 116.5(2)  | 118.41(9)     | -              | 116.42(6) and 117.76(6)   |
| P1—S1—S2 (P1-S1-S1#1*)       | 105.16(6)     | 103.57(2)  | 104.74(5)  | 103.1(1)  | 104.81(4)     | 105.53(2)      | 104.65(3) and 102.07(3)   |
| P2—S2—S1                     | -             | 104.59(2)  | 103.23(5)  | 105.9(1)  | 107.23(4)     | -              | 103.64(3) and 103.37(2)   |
| <b>Torsion angles, °</b>     |               |            |            |           |               |                |                           |
| S3=P1-S1-S2<br>S2=P1-S1-S1#1 | 164.53(6)     | 176.23(2)  | 178.39(5)  | -171.0(1) | -163.94(4)    | -              | -171.21(3) and -170.28(3) |
| S1-S2-P2=S4                  | -             | -179.55(2) | 176.61(5)  | 174.9(1)  | -166.26(4)    | -              | -173.52(3) and -172.28(3) |

|                 |           |            |           |           |            |           |               |
|-----------------|-----------|------------|-----------|-----------|------------|-----------|---------------|
| P1-S1-S2-P2     | -93.68(6) | -105.86(2) | 106.77(5) | -112.9(1) | -114.35(4) | -         | -123.47(3)    |
| P1-S1-S1#1-P#1  |           |            |           |           |            | 124.93(2) | -126.30(3)    |
| O1-P1-S1-S2     | 37.5(1)   | 50.55(5)   | -56.7(1)  | 61.9(2)   | 70.67(9)   | 73.08(4)  | -46.07(6) and |
| O1-P1-S1-S1#1   |           |            |           |           |            |           | -47.93(6)     |
| S1-S2-P2-O2     | -         | 54.46(5)   | -57.1(1)  | 47.5(2)   | 68.77(9)   | -         | -44.43(6) and |
|                 |           |            |           |           |            |           | -47.83(5)     |
| C10-P1-S1-S2    | -70.4(1)  | -58.99(6)  | 50.7(1)   | -45.7(3)  | -38.1(1)   | -34.74(5) | 63.29(7) and  |
| C10P1S1-S1#1*   |           |            |           |           |            |           | 60.13(7)      |
| C20-P2-S2-S1    | -         | -53.13(5)  | 50.9(1)   | -60.6(3)  | -41.0(1)   | -         | 64.31(7) and  |
|                 |           |            |           |           |            |           | 60.92(7)      |
| C11-C10-P1-S3   | 178.1(3)  | 46.6(1)    | 154.0(3)  | -153.5(5) | 36.9(2)    | 28.8(1)   | -12.3(2) and  |
|                 |           |            |           |           |            |           | 148.6(1)      |
| C21-C20-P2-S4   | -         | 24.3(1)    | -37.8(3)  | -143.6(5) | 35.8(2)    | -         | -17.6(2) and  |
|                 |           |            |           |           |            |           | -34.3(2)      |
| S3P1...O3CH3    | -178.2(3) | -129.2(1)  | -33.9(3)  | 20.9(5)   | 42.0(2)    | 30.18(9)  | -4.8(1) and   |
| S2 P1...O2CH3** |           |            |           |           |            |           | -11.3(1)      |
| S4P2...O4CH3    | -         | 21.1(1)    | 139.4(2)  | 32.7(5)   | -144.7(2)  | -         | 140.6(1) and  |
|                 |           |            |           |           |            |           | -38.4(1)      |

\* structures of **2a** and **2c** were already published (W. Przychodzeń, J. Chojnacki, *Acta Cryst.*, 2018, **E74**, 212–216)  
\*\* for Z' = ½, #1 for **2a**: 1+y, -1+x, -z; #1 for **2d**: 1-x, y, ½ -z (both are 2-fold rotations)

**Table S5.** Geometric parameters for cyclic sulfanes **3**

|                           | Cis-3a   | Trans-3a | Cis-3b   | Trans-3b | Cis-3c               | Trans-3c |
|---------------------------|----------|----------|----------|----------|----------------------|----------|
| independent molecules, Z' | 2        | 2        | 1        | 2        | 1                    | 1        |
| <b>Bond lengths, Å</b>    |          |          |          |          |                      |          |
| P1=S2                     | 1.922(2) | 1.923(1) | 1.926(2) | 1.924(3) | 1.924(1)             | 1.927(2) |
| P2=S3                     | 1.923(3) | 1.931(1) | 1.920(2) | 1.917(3) | 1.938(1)             | 1.918(2) |
| P3=S5                     | 1.921(3) | 1.924(1) | -        | 1.911(3) | -                    | -        |
| P4=S6                     | 1.926(2) | 1.931(1) |          | 1.921(2) |                      |          |
| P1—S1                     | 2.101(3) | 2.124(1) | 2.103(2) | 2.129(3) | 2.130(1)<br>2.103(1) | 2.113(3) |
| P2—S1                     | 2.110(2) | 2.120(1) | 2.131(2) | 2.118(3) |                      | 2.129(2) |
| P3—S4                     | 2.111(2) | 2.121(1) | -        | 2.140(2) | -                    | -        |
| P4—S4                     | 2.099(3) | 2.117(1) |          | 2.105(2) |                      |          |
| P1—O1                     | 1.587(4) | 1.588(3) | 1.578(3) | 1.585(5) | 1.585(3)             | 1.586(4) |
| P2—O2                     | 1.593(5) | 1.589(2) | 1.571(3) | 1.596(5) | 1.584(3)             | 1.588(4) |
| P3—O5                     | 1.586(5) | 1.594(3) | -        | 1.582(6) | -                    | -        |
| P4—O6                     | 1.585(4) | 1.592(2) |          | 1.593(5) |                      |          |
| P1—C10                    | 1.788(7) | 1.783(3) | 1.782(5) | 1.792(7) | 1.777(3)             | 1.785(5) |
| P2—C20                    | 1.782(7) | 1.788(3) | 1.779(5) | 1.780(6) | 1.779(3)             | 1.802(6) |
| P3—C30                    | 1.771(7) | 1.783(3) | -        | 1.794(7) | -                    | -        |
| P4—C40                    | 1.794(7) | 1.780(3) |          |          |                      |          |
| <b>valence angles, °</b>  |          |          |          |          |                      |          |

|              |           |           |           |          |           |           |
|--------------|-----------|-----------|-----------|----------|-----------|-----------|
| S1P1=S2      | 107.3(1)  | 116.79(6) | 106.05(8) | 114.3(1) | 105.45(5) | 107.64(9) |
| S1P2=S3      | 105.1(1)  | 108.44(5) |           | 105.0(1) | 105.77(5) | 116.8(1)  |
| S4P3=S5      | 105.7(1)  | 115.80(6) | -         | 115.6(1) | -         | -         |
| S4P4=S6      | 106.7(1)  | 108.16(6) |           | 105.8(1) |           |           |
| O1P1=S2      | 117.3(2)  | 116.3(1)  | 116.8(1)  | 117.2(2) | 118.3(1)  | 117.1(2)  |
| O2P2=S3      | 117.4(2)  | 116.8(1)  | 119.0(1)  | 117.6(2) | 116.8(1)  | 117.5(2)  |
| O5P3=S5      | 117.7(2)  | 116.6(1)  | -         | 117.1(2) | -         | -         |
| O6P4=S6      | 117.3(2)  | 116.0(1)  |           | 117.3(2) |           |           |
| O1P1—S1      | 106.3(2)  | 103.4(1)  | 106.3(1)  | 104.7(2) | 106.6(1)  | 105.5(2)  |
| O2P2—S1      | 106.1(2)  | 105.4(1)  | 105.6(1)  | 104.2(2) | 107.4(1)  | 100.8(2)  |
| O5P3—S4      | 106.3(2)  | 104.1(1)  | -         | 104.3(2) | -         | -         |
| O6P4—S4      | 106.0(2)  | 105.7(1)  |           | 105.0(2) |           |           |
| O1P1C10      | 98.3(3)   | 100.9(1)  | 101.6(2)  | 102.6(2) | 102.7(1)  | 101.2(2)  |
| O2P2C20      | 102.5(3)  | 101.2(1)  | 101.9(2)  | 102.3(2) | 101.5(1)  | 103.5(2)  |
| O5P3C30      | 102.2(3)  | 100.0(1)  | -         | 1.794(7) | -         | -         |
| O6P4C40      | 98.9(3)   | 100.9(1)  |           | 1.786(8) |           |           |
| P1-S1-P2     | 105.73(9) | 105.28(5) | 108.70(8) | 106.4(1) | 108.77(5) | 103.00(9) |
| P3-S4-P4     | 105.66(9) | 104.19(5) | -         | 105.1(1) | -         | -         |
| P1-O1-C1     | 125.1(4)  | 123.0(2)  | 120.1(3)  | 124.1(5) | 121.0(2)  | 120.9(3)  |
| P2-O2-C2/N*  | 122.5(4)  | 123.1(2)  | 121.9(3)  | 120.3(4) | 122.1(2)  | 125.6(3)  |
| P3-O5-C50    | 121.8(4)  | 123.2(2)  | -         | 125.2(5) | -         | -         |
| P4-O6-C51/M* | 124.6(4)  | 125.0(2)  |           | 118.1(4) |           |           |

(\*) N and M denote the terminal C atom number in the macrocyclic ring

| Torsion angles, ° |           |            |            |           |            |           |
|-------------------|-----------|------------|------------|-----------|------------|-----------|
| S2=P1-S1-P2       | 154.9(1)  | 65.47(7)   | -166.95(8) | -57.1(1)  | -174.57(5) | 164.85(9) |
| P1-S1-P2=S3       | -170.5(1) | 137.14(6)  | 170.53(8)  | -163.3(1) | 172.32(5)  | 58.2(1)   |
| S5=P3-S4-P4       | 170.6(1)  | -69.34(7)  | -          | 57.2(1)   | -          | -         |
| P3-S4-P4=S6       | -155.2(1) | -131.90(6) |            | 163.5(1)  |            |           |
| C11C10P1=S<br>2   | 94.8(6)   | 31.4(3)    | -73.6(4)   | -19.5(7)  | -41.9(3)   | -121.1(4) |
| C21C20P2=S<br>3   | -38.6(6)  | 153.6(3)   | 36.3(4)    | -45.0(7)  | 74.1(3)    | 17.8(5)   |
| C31C30P3=S<br>5   | 42.4(6)   | -40.2(3)   | -          | 26.3(7)   | -          | -         |
|                   | -94.2(6)  | -155.8(3)  |            | 59.0(7)   |            |           |

|                                                      |                       |                       |                     |                        |                     |                    |
|------------------------------------------------------|-----------------------|-----------------------|---------------------|------------------------|---------------------|--------------------|
| C41C40P4=S<br>6                                      |                       |                       |                     |                        |                     |                    |
| S2P1...P2S3                                          | -23.6(2)              | 174.21(7)             | 6.0(2)              | 155.4(2)               | -3.6(1)             | -155.7(1)          |
| S5P3...P4S6                                          | 23.0(2)               | -172.00(7)            | -                   | -156.5(2)              | -                   | -                  |
| S2P1...O3CH <sub>3</sub><br>S3P2...O4CH <sub>3</sub> | 100.8(4)<br>147.8(5)  | -142.4(3)<br>-22.7(3) | -77.4(4)<br>29.7(4) | 162.4(5)<br>-41.7(6)   | 139.5(2)<br>78.0(2) | 62.1(4)<br>21.0(5) |
| S5P3...O7CH <sub>3</sub><br>S6P4...O8CH <sub>3</sub> | -143.1(5)<br>-99.8(5) | 130.4(3)<br>-155.7(2) | -                   | -162.6(5)<br>-102.7(6) | -                   | -                  |

**Table S6.** Hydrogen-bond geometry (Å, °) for investigated cyclic disulfanes **2**.

| $D-H\cdots A$                                                                 | $D-H$ | $H\cdots A$ | $D\cdots A$ | $D-H\cdots A$ |
|-------------------------------------------------------------------------------|-------|-------------|-------------|---------------|
| <i>Comp 2b</i>                                                                |       |             |             |               |
| C12—H12 $\cdots$ O4 <sup>i</sup>                                              | 0.95  | 2.49        | 3.4346 (18) | 171           |
| C26—H26C $\cdots$ S4 <sup>ii</sup>                                            | 0.98  | 2.79        | 3.7602 (16) | 169           |
| Symmetry codes: (i) $x, -y+5/2, z-1/2$ ; (ii) $x, -y+3/2, z+1/2$              |       |             |             |               |
| <i>Comp 2b'</i>                                                               |       |             |             |               |
| C2—H2 $\cdots$ S4 <sup>i</sup>                                                | 1.00  | 2.93        | 3.783 (4)   | 144           |
| C6—H6C $\cdots$ O3 <sup>i</sup>                                               | 0.98  | 2.66        | 3.450 (6)   | 138           |
| C6—H6A $\cdots$ S2 <sup>ii</sup>                                              | 0.98  | 3.02        | 3.671 (5)   | 125           |
| C15—H15 $\cdots$ S3 <sup>iii</sup>                                            | 0.95  | 2.94        | 3.773 (4)   | 148           |
| Symmetry codes: (i) $x-1, y, z$ ; (ii) $x-1, y+1, z$ ; (iii) $-x+1, -y+1, -z$ |       |             |             |               |

|                                                                                                                    |      |      |             |     |
|--------------------------------------------------------------------------------------------------------------------|------|------|-------------|-----|
| Comp <i>syn</i> - <b>2d</b> mono                                                                                   |      |      |             |     |
| C16—H16B···S2 <sup>i</sup>                                                                                         | 0.98 | 3.03 | 3.9768 (16) | 163 |
| C16—H16C···O2 <sup>ii</sup>                                                                                        | 0.98 | 2.53 | 3.3626 (18) | 143 |
| Symmetry codes: (i) -x+1, -y, -z+1; (ii) -x+2, -y, -z+1                                                            |      |      |             |     |
| Comp <i>anti</i> - <b>2d</b> tri                                                                                   |      |      |             |     |
| C15—H15···S4 <sup>i</sup>                                                                                          | 0.95 | 2.97 | 3.684 (3)   | 133 |
| C16—H16A···S4 <sup>ii</sup>                                                                                        | 0.98 | 2.86 | 3.652 (3)   | 138 |
| C16—H16C···S3 <sup>iii</sup>                                                                                       | 0.98 | 3.00 | 3.827 (3)   | 143 |
| C21—H21···S2 <sup>iv</sup>                                                                                         | 0.95 | 2.95 | 3.617 (3)   | 129 |
| C25—H25···S3 <sup>v</sup>                                                                                          | 0.95 | 2.97 | 3.672 (3)   | 131 |
| Symmetry codes: (i) -x+1, -y, -z+1; (ii) x, y-1, z; (iii) -x+2, -y-1, -z+1; (iv) -x+2, -y, -z+1; (v) -x+2, -y, -z. |      |      |             |     |

**Table S7.** Hydrogen-bond geometry (Å, °) for investigated sulfides **3**

| $D-H\cdots A$               | $D-H$ | $H\cdots A$ | $D\cdots A$ | $D-H\cdots A$ |
|-----------------------------|-------|-------------|-------------|---------------|
| <i>Comp cis</i> - <b>3a</b> |       |             |             |               |
| C11—H11···S1                | 0.95  | 2.87        | 3.333 (6)   | 111           |
| C15—H15···S3 <sup>i</sup>   | 0.95  | 3.00        | 3.871 (7)   | 153           |



|                                                                                                                                                           |      |      |           |     |
|-----------------------------------------------------------------------------------------------------------------------------------------------------------|------|------|-----------|-----|
| C16—H16A···S3 <sup>ii</sup>                                                                                                                               | 0.98 | 2.84 | 3.751 (7) | 154 |
| C16—H16B···S6 <sup>iii</sup>                                                                                                                              | 0.98 | 3.02 | 3.675 (8) | 126 |
| C16—H16C···S4 <sup>iv</sup>                                                                                                                               | 0.98 | 2.90 | 3.533 (8) | 123 |
| C36—H36A···S2 <sup>ii</sup>                                                                                                                               | 0.98 | 3.01 | 3.754 (9) | 133 |
| C41—H41···S4                                                                                                                                              | 0.95 | 2.95 | 3.405 (6) | 111 |
| C42—H42···S2 <sup>v</sup>                                                                                                                                 | 0.95 | 3.02 | 3.931 (7) | 161 |
| C46—H46B···S1 <sup>vi</sup>                                                                                                                               | 0.98 | 3.00 | 3.601 (8) | 121 |
| C52—H52B···O2 <sup>i</sup>                                                                                                                                | 0.99 | 2.52 | 3.464 (8) | 159 |
| Symmetry codes: (i) x, y, z-1; (ii) -x+3/2, y+1/2, z-1/2; (iii) x-1/2, -y+3/2, z+1; (iv) x-1/2, -y+3/2, z; (v) x+1/2, -y+3/2, z; (vi) x+1/2, -y+3/2, z-1. |      |      |           |     |
| <i>Comp trans-3a</i>                                                                                                                                      |      |      |           |     |
| C2—H2A···S6 <sup>i</sup>                                                                                                                                  | 0.99 | 2.88 | 3.622 (3) | 132 |
| C16—H16A···S2 <sup>ii</sup>                                                                                                                               | 0.98 | 2.91 | 3.534 (5) | 123 |
| C21—H21···S2                                                                                                                                              | 0.95 | 2.80 | 3.614 (4) | 144 |
| C22—H22···O7 <sup>iii</sup>                                                                                                                               | 0.95 | 2.55 | 3.457 (4) | 160 |
| C32—H32···S2 <sup>ii</sup>                                                                                                                                | 0.95 | 2.91 | 3.721 (4) | 144 |
| C36—H36A···S5 <sup>iv</sup>                                                                                                                               | 0.98 | 2.94 | 3.590 (4) | 125 |
| C41—H41···S5                                                                                                                                              | 0.95 | 2.91 | 3.718 (4) | 143 |

|                                                                                                                                |      |      |            |     |
|--------------------------------------------------------------------------------------------------------------------------------|------|------|------------|-----|
| C45—H45···O8 <sup>v</sup>                                                                                                      | 0.95 | 2.65 | 3.584 (4)  | 167 |
| Symmetry codes: (i) -x, -y+2, -z; (ii) -x, y+1/2, -z+1/2; (iii) -x, y-1/2, -z+1/2; (iv) -x-1, y-1/2, -z+1/2; (v) -x, -y+3, -z. |      |      |            |     |
| <i>Comp cis-3b</i>                                                                                                             |      |      |            |     |
| C2—H2···S1 <sup>i</sup>                                                                                                        | 0.93 | 2.75 | 3.460 (5)  | 134 |
| C5—H5···S2 <sup>ii</sup>                                                                                                       | 0.93 | 2.89 | 3.790 (5)  | 162 |
| C7—H7A···S2 <sup>iii</sup>                                                                                                     | 0.96 | 2.88 | 3.828 (7)  | 171 |
| C14—H14A···S3 <sup>iii</sup>                                                                                                   | 0.96 | 3.01 | 3.881 (7)  | 151 |
| Symmetry codes: (i) x+1/2, -y+1/2, z+1/2; (ii) -x+2, -y, -z; (iii) x+1, y, z.                                                  |      |      |            |     |
| <i>Comp trans-3b</i>                                                                                                           |      |      |            |     |
| C16—H16C···S6 <sup>i</sup>                                                                                                     | 0.96 | 2.86 | 3.487 (9)  | 124 |
| C26—H26C···S2 <sup>ii</sup>                                                                                                    | 0.96 | 2.74 | 3.674 (10) | 166 |
| C41—H41···O7 <sup>iii</sup>                                                                                                    | 0.93 | 2.54 | 3.389 (9)  | 153 |
| C46—H46A···O3 <sup>iv</sup>                                                                                                    | 0.96 | 2.65 | 3.554 (11) | 157 |
| Symmetry codes: (i) x, -y+2, z+1/2; (ii) x, -y+1, z-1/2; (iii) x, -y+3, z-1/2; (iv) x+1, -y+2, z-1/2.                          |      |      |            |     |
| <i>Comp cis-3c</i>                                                                                                             |      |      |            |     |
| C1—H1A···S2                                                                                                                    | 0.99 | 2.84 | 3.408 (4)  | 117 |
| C2—H2A···S1                                                                                                                    | 0.99 | 2.95 | 3.660 (4)  | 130 |
| C12—H12···S1 <sup>i</sup>                                                                                                      | 0.95 | 3.02 | 3.759 (3)  | 136 |

|                                                                                             |      |      |           |     |
|---------------------------------------------------------------------------------------------|------|------|-----------|-----|
| C14—H14···S3 <sup>ii</sup>                                                                  | 0.95 | 2.96 | 3.907 (3) | 171 |
| C16—H16A···S2 <sup>iii</sup>                                                                | 0.98 | 2.91 | 3.742 (3) | 143 |
| C16—H16C···S1 <sup>ii</sup>                                                                 | 0.98 | 2.99 | 3.951 (4) | 168 |
| C24—H24···S3 <sup>iv</sup>                                                                  | 0.95 | 2.99 | 3.875 (3) | 156 |
| Symmetry codes: (i) -x+2, -y+1, -z; (ii) x+1, y, z; (iii) x+1, y-1, z; (iv) -x+2, -y, -z+1. |      |      |           |     |
| <i>Comp trans-3c</i>                                                                        |      |      |           |     |
| C21—H21···S3                                                                                | 0.93 | 2.99 | 3.448 (6) | 112 |
| C21—H21···S3 <sup>i</sup>                                                                   | 0.93 | 3.09 | 3.952 (6) | 156 |
| C26—H26B···O3 <sup>i</sup>                                                                  | 0.96 | 2.56 | 3.462 (8) | 156 |
| Symmetry code: (i) -x+1, -y, -z.                                                            |      |      |           |     |

**Table S8.** Transannular hydrogens and transannular H-H repulsive and H-S attractive interactions taken from X-Ray structures and from calculated structures (in brackets) of **2** and **3**

| Compd               | transannular hydrogens | repulsive interaction  | distance       | transannular CH...S interaction<br>/hydrogen bond* | distance           |
|---------------------|------------------------|------------------------|----------------|----------------------------------------------------|--------------------|
| <i>trans-2a</i>     | -                      | -                      | -              | -                                                  | -                  |
| ( <i>trans-2a</i> ) | -                      | -                      | -              | -                                                  | -                  |
| ( <i>cis-2a</i> )   | -                      | -                      | -              | -                                                  | -                  |
| <i>trans-2b</i>     | C1H, C3H               | -                      | -              | C1H...S1<br>C3H...S2                               | 3.109<br>3.109     |
| ( <i>trans-2b</i> ) | C1H, C3H               | -                      | -              | C1H...S1<br>C3H...S2                               | 3.032<br>3.057     |
| ( <i>cis-2b</i> )   | C1H, C3H               | -                      | -              | C1H...S1<br>C3H...S2                               | 3.108<br>3.070     |
| <i>trans-2b'</i>    | C1H, C3H               | -                      | -              | C1H...S1<br>C3H...S2                               | 3.038<br>3.046     |
| <i>trans-2c</i>     | C1H, C3H               | -                      | -              | C1H...S1<br>C3H...S2                               | 3.171<br>3.222     |
| ( <i>trans-2c</i> ) | C1H, C3H               | -                      | -              | C1H...S1<br>C3H...S2                               | 3.101<br>3.321     |
| ( <i>cis-2c</i> )   | C1H, C3H               | -                      | -              | C1H...S1<br>C3H...S2                               | 3.170<br>3.222     |
| <i>trans-2d</i>     | C1H, C4H,<br>C3H, C6H  | C1H...HC4<br>C3H...HC6 | 2.221<br>2.181 | C1H...S1<br>C6H...S2                               | 3.292<br>3.296     |
| ( <i>trans-2d</i> ) | C1H, C4H,<br>C3H, C6H  | C1H...HC4<br>C3H...HC6 | 2.184<br>2.182 | C1H...S1<br>C6H...S2                               | 3.374<br>3.460     |
| ( <i>cis-2d</i> )   | C1H, C4H,<br>C3H, C6H  | C1H...HC4<br>C3H...HC6 | 2.182<br>2.159 | C1H...S1<br>C6H...S2                               | 3.364<br>3.357     |
| <i>cis-3a</i>       | C1H                    | -                      | -              | <b>C1H...S</b>                                     | <b>2.767-2.786</b> |
| ( <i>cis-3a</i> )   | C1H                    | -                      | -              | <b>C1H...S</b>                                     | <b>2.739</b>       |
| <i>trans-3a</i>     | C1H, C3H               | -                      | -              | C1H...S                                            | 3.387              |
| ( <i>trans-3a</i> ) | C1H, C3H               | -                      | -              | C1H...S                                            | 3.679              |
| <i>cis-3b</i>       | C1H, C3H               | -                      | -              | C1H...S<br>C3H...S                                 | 3.082<br>3.044     |
| ( <i>cis-3b</i> )   | C1H, C3H               | -                      | -              | C1H...S<br>C3H...S                                 | 3.120<br>3.069     |
| <i>trans-3b</i>     | C1H                    | -                      | -              | <b>C1H...S</b>                                     | <b>2.838</b>       |
| ( <i>trans-3b</i> ) | C1H                    | -                      | -              | <b>C1H...S</b>                                     | <b>2.873</b>       |

|                          |          |   |   |         |       |
|--------------------------|----------|---|---|---------|-------|
| <i>cis-3c</i>            | C2H, C3H | - | - | C3H...S | 2.946 |
| <b>(<i>cis-3c</i>)</b>   | C2H, C3H | - | - | C3H...S | 2.951 |
| <i>trans-3c</i>          | C1H, C4H | - | - | C1H...S | 3.190 |
| <b>(<i>trans-3c</i>)</b> | C1H, C4H | - | - | C1H...S | 3.195 |

(\*) Interactions in which the CH...S distance is smaller than the sum of the van der Waals radii (<2.9 Å) are defined as hydrogen bonds and listed in bold

## Calculations

The molecular structure of disulfanes **2** and sulfanes **3** was optimized with the density functional theory at MN12SX/6-311G\* level using Gaussian 09<sup>2</sup>. Solvent effects of dichloroethane were included using PCM continuum model. The optimized geometries were used to calculate the NMR parameters.

Dipole moments (debye) computed for molecules **3**

---

<sup>2</sup> M. J. Frisch, G. W. Trucks, H. B. Schlegel, G. E. Scuseria, M. A. Robb, J. R. Cheeseman, G. Scalmani, V. Barone, G. A. Petersson, H. Nakatsuji, X. Li, M. Caricato, A. Marenich, J. Bloino, B. G. Janesko, R. Gomperts, B. Mennucci, H. P. Hratchian, J. V. Ortiz, A. F. Izmaylov, J. L. Sonnenberg, D. Williams-Young, F. Ding, F. Lipparini, F. Egidi, J. Goings, B. Peng, A. Petrone, T. Henderson, D. Ranasinghe, V. G. Zakrzewski, J. Gao, N. Rega, G. Zheng, W. Liang, M. Hada, M. Ehara, K. Toyota, R. Fukuda, J. Hasegawa, M. Ishida, T. Nakajima, Y. Honda, O. Kitao, H. Nakai, T. Vreven, K. Throssell, J. A. Montgomery, Jr., J. E. Peralta, F. Ogliaro, M. Bearpark, J. J. Heyd, E. Brothers, K. N. Kudin, V. N. Staroverov, T. Keith, R. Kobayashi, J. Normand, K. Raghavachari, A. Rendell, J. C. Burant, S. S. Iyengar, J. Tomasi, M. Cossi, J. M. Millam, M. Klene, C. Adamo, R. Cammi, J. W. Ochterski, R. L. Martin, K. Morokuma, O. Farkas, J. B. Foresman, and D. J. Fox, Gaussian, Inc., Wallingford CT, 2016.

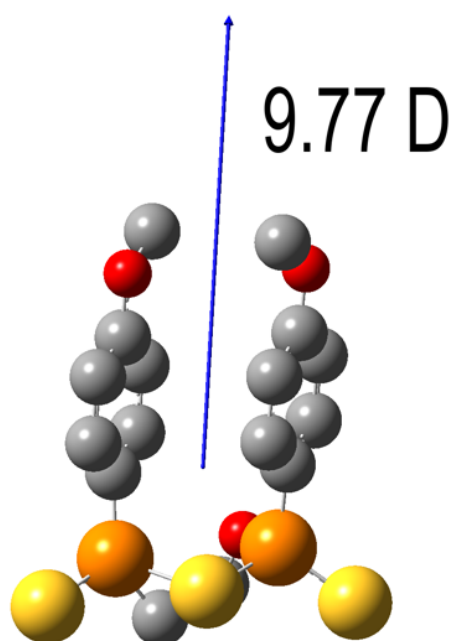

**Figure S49.** Dipole moment and its orientation for *cis*-3a

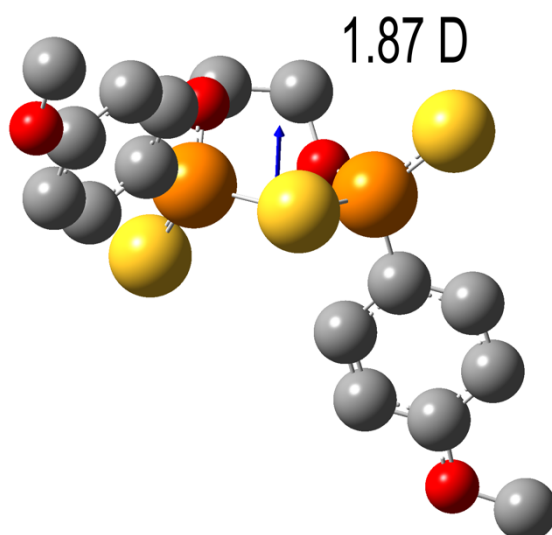

**Figure S50.** Dipole moment and its orientation for *trans*-3a

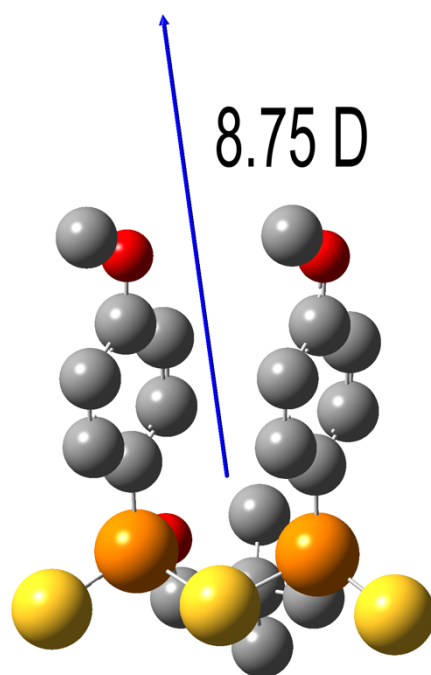

**Figure S51.** Dipole moment and its orientation for *cis*-3b

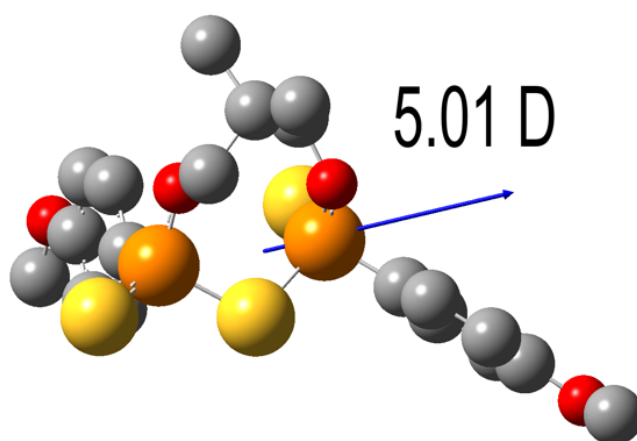

**Figure S52.** Dipole moment and its orientation for *trans*-3b



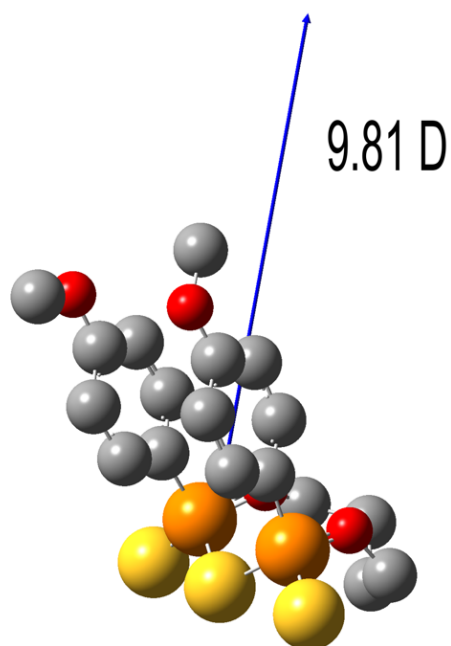

**Figure S53.** Dipole moment and its orientation for *cis*-3c

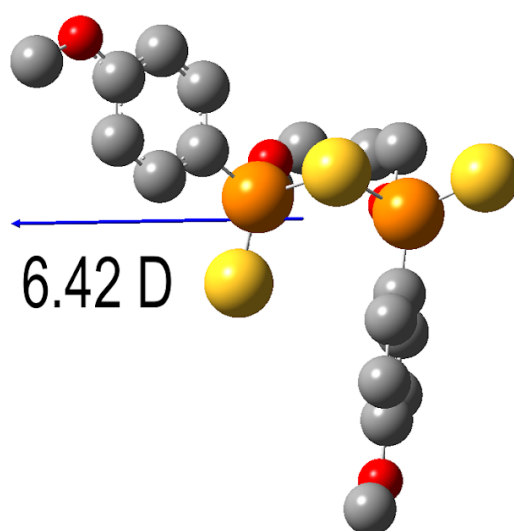

**Figure S54.** Dipole moment and its orientation for *trans*-3c
